# Supplementary material for: Anthocyanin Accumulation Provides Protection against High Light Stress While Reducing Photosynthesis in Apple Leaves
Source: MDPI journal article supplement (doi:10.3390/ijms232012616), 2022-10-20
Supplement: s1 [file s1]

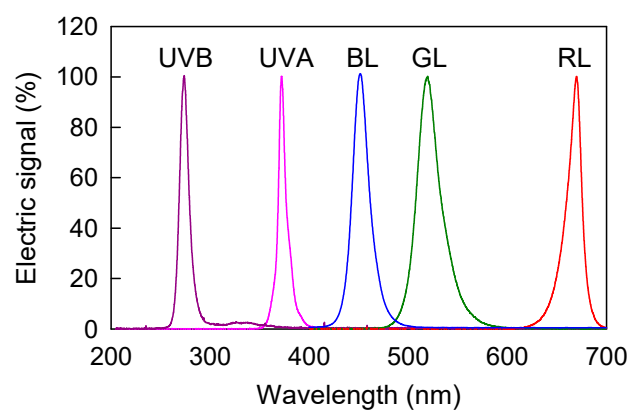

**Figure S1** The spectra of different light sources used in this study.

BL, blue light; GL, green light; RL, red light.

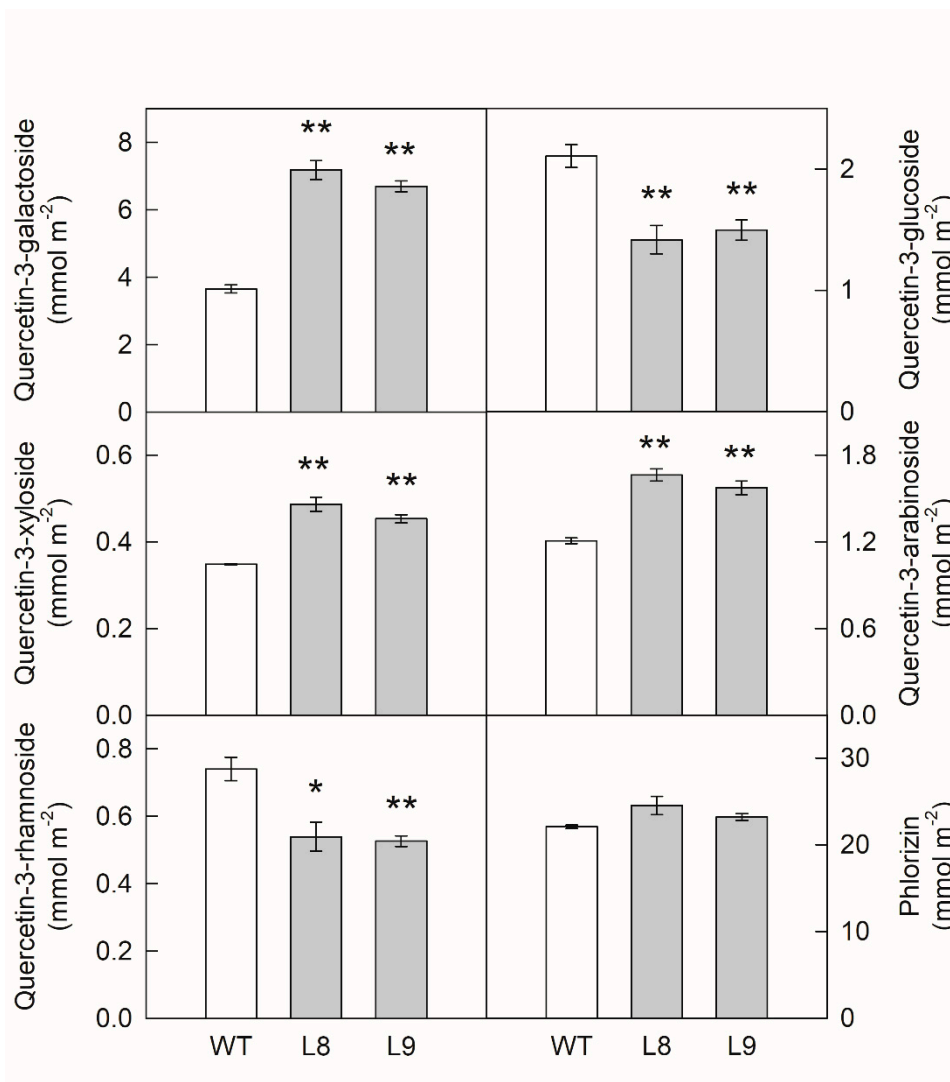

**Figure S2** The contents of flavonol compounds and phlorizin in leaves of ‘Galaxy Gala’ (WT) and its transgenic lines (L8, L9) with *MdMYB10* overexpression.

Data are means  $\pm$  SE (n = 5). The “\*” or “\*\*” indicates a significant difference at  $P < 0.05$  or  $P < 0.01$ , respectively, *t*-test.

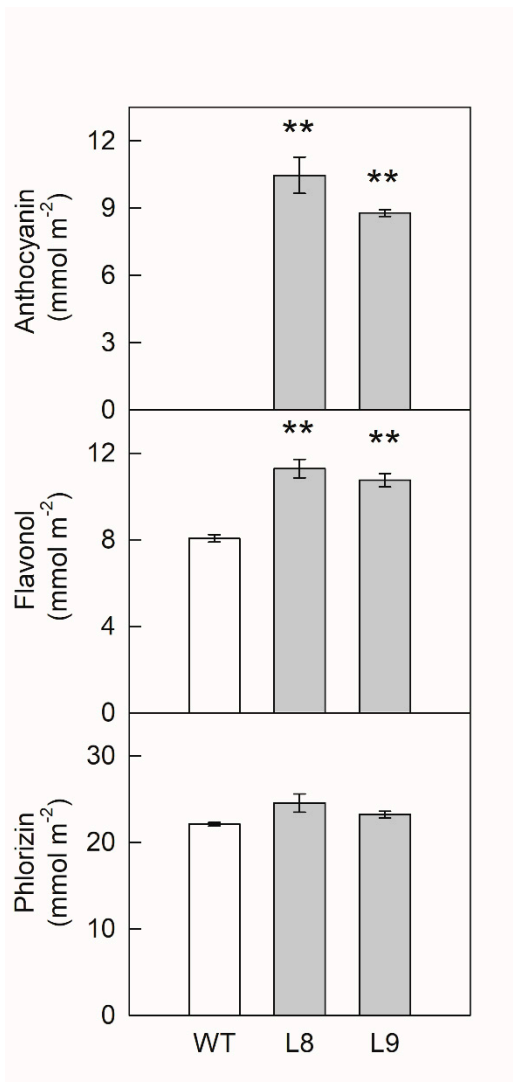

**Figure S3** Flavonoid content in the bark of young branches of ‘Galaxy Gala’ (WT) and its transgenic lines (L8, L9) with *MdMYB10* overexpression.

Data are means  $\pm$  SE (n = 5). For the statistical analysis, “\*\*” indicates a significant difference at  $P < 0.01$ , *t*-test.

A

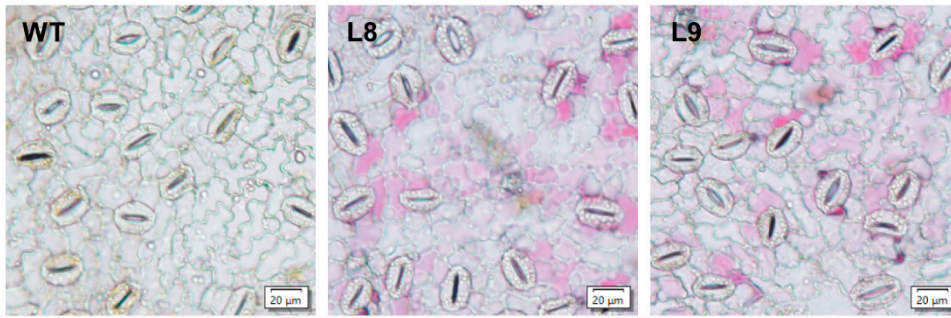

B

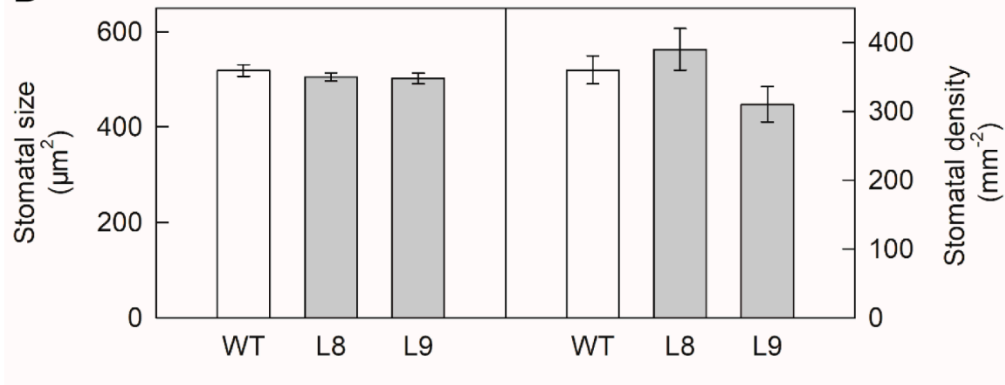

**Figure S4** Stomatal phenotypes (A), size, and density (B) in leaves of ‘Galaxy Gala’ (WT) and its transgenic lines (L8, L9) with overexpression of *MdMYB10*. Five biological replicates were performed for each point.

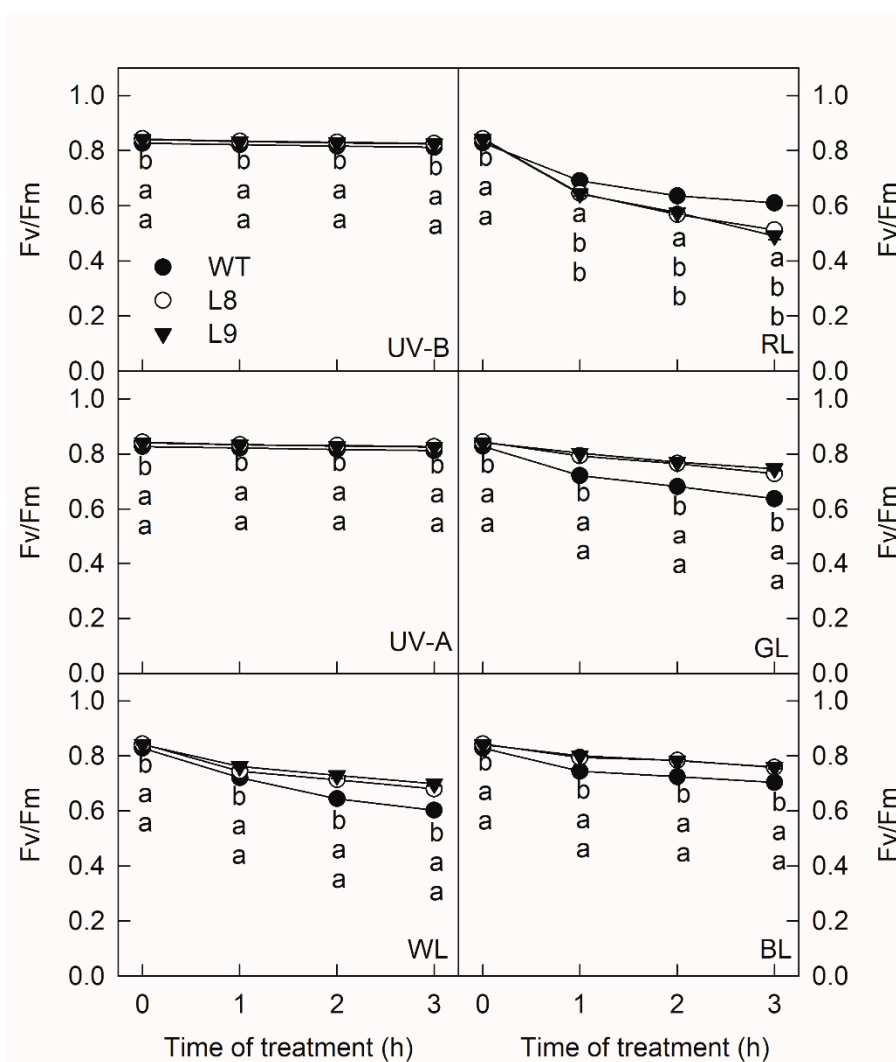

**Figure S5** Relative changes in the maximum quantum yield of PSII (Fv/Fm) in leaves of ‘Galaxy Gala’ (WT) and its transgenic lines (L8, L9) with *MdMYB10* overexpression after different treatments under laboratory conditions.

WL, white light, RL, red light; GL, green light; BL, blue light. Data are means  $\pm$  SE (n = 5). Different small letters below the symbols indicate a significant difference among genotypes at P < 0.01, LSD.
