# Supplementary material for: Anthocyanin Accumulation Provides Protection against High Light Stress While Reducing Photosynthesis in Apple Leaves
Source: Int J Mol Sci. 2022 Oct 20;23(20):12616. doi: 10.3390/ijms232012616 (PMC9604341; doi:10.3390/ijms232012616)
Supplement: Supplementary file 1 [file ijms-23-12616-s001.zip › ijms-1975915-Supplemental Tables.xlsx]

## Sheet: Table S1
Table S1 Differential gene expression (DEG) between ‘Galaxy Gala’ (WT) and its transgenic lines (L8, L9) with overexpression of MdMYB10.
gene_id	WT_1	WT_2	WT_3	L8_1	L8_2	L8_3	L9_1	L9_2	L9_3	Swiss-Prot_annotation	NR_annotation
MD14G1020100	1.84222	2.29695	1.52249	100.471	64.0983	123.554	110.066	122.07	106.794	--	PREDICTED: solute carrier family 35 member F1-like [Pyrus x bretschneideri]
MD17G1272100	0	0.119638	0	2698.03	1557.04	1936.61	2499.71	2845.02	1753.84	Glutathione S-transferase F12 OS=Arabidopsis thaliana GN=GSTF12 PE=1 SV=1	glutathione S-transferase F12-like [Malus domestica]
MD06G1201700	14.1048	18.7016	20.4154	567.08	326.93	529.602	662.27	687.176	486.757	Flavonoid 3&apos;-monooxygenase OS=Petunia hybrida GN=CYP75B2 PE=2 SV=1	PREDICTED: flavonoid 3&apos;-monooxygenase [Malus domestica]
MD14G1179400	8.5123	8.26479	9.01171	48.9784	45.8342	55.9774	93.7639	77.3165	93.8826	Probable boron transporter 2 OS=Arabidopsis thaliana GN=BOR2 PE=2 SV=1	PREDICTED: probable boron transporter 2 [Malus domestica]
MD09G1278600	0.0446199	0	0	714.527	869.509	710.012	473.819	776.505	711.38	Transcription factor MYB113 OS=Arabidopsis thaliana GN=MYB113 PE=1 SV=1	MYB transcription factor [Malus domestica]
MD10G1075200	43.3469	29.6799	20.6506	0.60733	0.885835	0.909235	0.135236	0.0747624	0.0679718	Transcription factor RADIALIS OS=Antirrhinum majus GN=RAD PE=1 SV=1	PREDICTED: transcription factor RADIALIS-like [Malus domestica]
MD13G1083700	0.277921	0.101612	0.116335	9.32628	5.5954	9.77818	15.8126	16.4549	15.6664	Probable inactive receptor kinase At1g27190 OS=Arabidopsis thaliana GN=At1g27190 PE=1 SV=1	PREDICTED: probable inactive receptor kinase At1g27190 [Malus domestica]
MD07G1306900	20.2609	9.56739	15.1623	329.746	186.377	330.63	363.881	286.502	226.493	Anthocyanidin 3-O-glucosyltransferase 2 OS=Fragaria ananassa GN=FGT PE=1 SV=1	PREDICTED: anthocyanidin 3-O-glucosyltransferase 2-like [Malus domestica]
MD04G1183900	5.23909	6.21043	5.43178	20.387	20.1294	20.6687	22.0021	23.1533	27.0959	Phytochrome type A OS=Lathyrus sativus GN=PHYA PE=3 SV=1	PREDICTED: phytochrome A isoform X2 [Malus domestica]
MD13G1040100	18.6483	30.1403	20.9399	165.667	234.066	218.013	216.473	172.35	198.827	Universal stress protein A-like protein OS=Arabidopsis thaliana GN=At3g01520 PE=1 SV=2	PREDICTED: universal stress protein A-like protein [Malus domestica]
MD13G1026400	13.1443	9.56437	11.2806	191.295	88.8171	201.609	329.984	289.028	260.407	Transcription repressor MYB6 OS=Arabidopsis thaliana GN=MYB6 PE=1 SV=1	PREDICTED: transcription repressor MYB6-like [Malus domestica]
MD08G1117200	0.853058	2.37308	1.05054	53.3891	28.8734	76.0476	81.6435	86.466	74.0846	Tetraspanin-19 OS=Arabidopsis thaliana GN=TOM2AH3 PE=2 SV=1	tetraspanin-19-like isoform X2 [Prunus avium]
MD16G1022200	59.1031	89.0929	66.1537	14.0229	12.5013	13.9827	8.02846	16.9465	28.9005	Probable pectinesterase/pectinesterase inhibitor 6 OS=Arabidopsis thaliana GN=PME6 PE=2 SV=1	PREDICTED: pectinesterase-like [Pyrus x bretschneideri]
MD14G1234500	0.46324	0.65865	0.804356	7.86885	10.9154	12.4219	6.98904	8.97911	7.07508	Transcription repressor MYB6 OS=Arabidopsis thaliana GN=MYB6 PE=1 SV=1	PREDICTED: myb-related protein Zm38-like [Malus domestica]
MD05G1314100	7.89591	18.9035	11.921	0.429818	0.422922	0.109997	0.132929	0.117579	0.0534497	Allantoinase OS=Arabidopsis thaliana GN=ALN PE=1 SV=1	PREDICTED: allantoinase-like [Malus domestica]
MD00G1033200	7.49072	6.16479	4.04545	56.0855	47.2345	78.1866	125.73	140.132	94.3673	#N/A	#N/A
MD16G1029400	10.6002	7.99227	8.31182	89.6317	57.3449	122.714	100.292	96.5248	90.5561	Transcription factor MYB7 OS=Arabidopsis thaliana GN=MYB7 PE=1 SV=1	PREDICTED: myb-related protein 308-like [Malus domestica]
MD12G1246700	97.8242	83.7303	94.1843	30.4281	25.2333	27.828	32.5138	28.9581	28.8516	Probable low-specificity L-threonine aldolase 1 OS=Arabidopsis thaliana GN=THA1 PE=1 SV=1	PREDICTED: probable low-specificity L-threonine aldolase 1 [Malus domestica]
MD09G1030800	5.1942	7.74849	9.31475	52.9974	40.4586	47.6133	35.2839	74.8727	61.224	Monodehydroascorbate reductase 4, peroxisomal OS=Arabidopsis thaliana GN=MDAR4 PE=1 SV=1	PREDICTED: monodehydroascorbate reductase 4, peroxisomal-like isoform X1 [Malus domestica]
MD07G1204100	25.0855	27.7746	31.0812	6.98537	4.73483	4.7976	1.47581	5.20601	5.76927	Ultraviolet-B receptor UVR8 OS=Arabidopsis thaliana GN=UVR8 PE=1 SV=1	PREDICTED: ultraviolet-B receptor UVR8 [Malus domestica]
MD01G1234400	3.22678	1.09162	3.99387	48.3082	39.2031	47.7636	76.4211	64.2613	71.0988	Anthocyanidin 3-O-glucosyltransferase 2 OS=Fragaria ananassa GN=FGT PE=1 SV=1	PREDICTED: anthocyanidin 3-O-glucosyltransferase 2-like isoform X2 [Malus domestica]
MD08G1217600	6.8704	6.70825	8.76804	36.7877	26.4157	36.6449	40.5475	55.1316	34.0137	Receptor-like protein kinase HSL1 OS=Arabidopsis thaliana GN=HSL1 PE=2 SV=1	PREDICTED: receptor-like protein kinase HAIKU2 [Malus domestica]
MD01G1236300	18.795	11.6021	27.6389	240.722	143.065	234.149	445.393	358.778	362.486	4-coumarate--CoA ligase 2 OS=Glycine max PE=2 SV=2	PREDICTED: 4-coumarate--CoA ligase 2-like [Malus domestica]
MD12G1197300	7.78212	7.81525	10.442	40.4275	30.7441	40.4477	40.5131	63.1065	49.6581	Glutamate--tRNA ligase, cytoplasmic OS=Arabidopsis thaliana GN=At5g26710 PE=1 SV=1	PREDICTED: glutamate--tRNA ligase, cytoplasmic [Pyrus x bretschneideri]
MD08G1093900	201.163	163.128	170.72	63.7846	62.8839	65.8934	55.7317	69.1469	72.0527	Cysteine proteinase RD21A OS=Arabidopsis thaliana GN=RD21A PE=1 SV=1	PREDICTED: low-temperature-induced cysteine proteinase-like [Malus domestica]
MD14G1214200	7.22363	6.40606	12.4375	0.882806	0.510967	0.875452	1.1467	1.20748	1.1527	Cytochrome P450 78A5 OS=Arabidopsis thaliana GN=CYP78A5 PE=2 SV=1	PREDICTED: cytochrome P450 78A5-like [Pyrus x bretschneideri]
MD06G1214400	2.11855	4.02434	4.63502	22.0773	27.2979	29.0008	42.8397	36.0173	43.091	Cytochrome P450 CYP736A12 OS=Panax ginseng PE=2 SV=1	PREDICTED: cytochrome P450 CYP736A12-like [Malus domestica]
MD01G1219500	16.2108	12.0122	15.32	54.4722	44.9142	48.4529	67.8108	44.0979	37.6968	Glutamate synthase [NADH], amyloplastic OS=Medicago sativa PE=1 SV=1	PREDICTED: glutamate synthase [NADH], amyloplastic isoform X1 [Malus domestica]
MD01G1092000	7.81059	7.53867	7.46161	1.42	1.37738	1.29696	1.36291	1.44664	2.19207	--	PREDICTED: uncharacterized protein LOC103423525 [Malus domestica]
MD03G1234100	7.82553	3.6195	3.6835	0.222688	0.400735	0.209823	0.270472	1.84414	1.06489	L-type lectin-domain containing receptor kinase IX.1 OS=Arabidopsis thaliana GN=LECRK91 PE=1 SV=1	PREDICTED: L-type lectin-domain containing receptor kinase IX.1-like [Pyrus x bretschneideri]
MD04G1063300	6.77561	4.43536	5.04525	21.7218	21.7302	26.2759	47.3743	29.4702	33.8546	WAT1-related protein At5g47470 OS=Arabidopsis thaliana GN=At5g47470 PE=3 SV=1	PREDICTED: WAT1-related protein At5g47470 [Malus domestica]
MD07G1043400	8.35157	1.9841	7.95054	96.1989	120.751	93.845	77.7379	111.938	104.159	Probable carboxylesterase 17 OS=Arabidopsis thaliana GN=CXE17 PE=2 SV=1	CXE carboxylesterase [Malus pumila]
MD16G1029300	1.73582	1.22801	1.63337	25.8535	9.11097	29.8152	25.3634	25.5814	12.453	U-box domain-containing protein 10 OS=Arabidopsis thaliana GN=PUB10 PE=2 SV=1	PREDICTED: U-box domain-containing protein 11-like [Malus domestica]
MD16G1260500	6.52133	5.88286	6.36944	17.3895	16.0471	15.8204	26.1656	16.7944	16.2008	--	PREDICTED: 5&apos;-nucleotidase domain-containing protein DDB_G0275467 isoform X1 [Malus domestica]
MD07G1279400	448.441	355.847	460.618	142.709	130.106	109.426	128.64	116.859	127.503	Heavy metal-associated isoprenylated plant protein 39 OS=Arabidopsis thaliana GN=HIPP39 PE=2 SV=1	PREDICTED: heavy metal-associated isoprenylated plant protein 3 [Malus domestica]
MD15G1054000	136.895	40.2947	104.534	4.67319	8.54613	3.49239	4.64946	12.2398	10.1822	Probable WRKY transcription factor 50 OS=Arabidopsis thaliana GN=WRKY50 PE=2 SV=1	PREDICTED: probable WRKY transcription factor 50 [Malus domestica]
MD00G1185200	2.01267	3.90059	3.69654	21.5702	15.6995	25.533	30.898	27.2005	22.2485	--	PREDICTED: uncharacterized protein LOC103927255 [Pyrus x bretschneideri]
MD07G1003600	43.6033	47.9463	66.1189	191.963	182.677	174.424	183.096	211.586	191.419	Linoleate 13S-lipoxygenase 2-1, chloroplastic OS=Solanum tuberosum GN=LOX2.1 PE=1 SV=1	lipoxygenase [Malus domestica]
MD12G1020200	75.5989	76.2729	78.1885	28.7958	24.7831	32.1204	19.4762	37.3742	33.0064	--	PREDICTED: ankyrin repeat domain-containing protein 30A-like isoform X2 [Pyrus x bretschneideri]
MD08G1196300	1.36645	1.16572	1.49478	8.02748	8.31442	13.5155	8.10125	15.1406	4.51841	AT-hook motif nuclear-localized protein 17 OS=Arabidopsis thaliana GN=AHL17 PE=2 SV=1	PREDICTED: AT-hook motif nuclear-localized protein 28-like [Malus domestica]
MD07G1004500	188.222	221.157	310.4	857.868	961.089	929.642	921.044	1117.66	956.315	Linoleate 13S-lipoxygenase 2-1, chloroplastic OS=Solanum tuberosum GN=LOX2.1 PE=1 SV=1	linoleate 13S-lipoxygenase 2-1, chloroplastic-like [Malus domestica]
MD12G1248300	13.3136	10.4492	10.9229	2.53641	3.11905	2.05904	1.94436	2.81521	2.74565	TMV resistance protein N OS=Nicotiana glutinosa GN=N PE=1 SV=1	PREDICTED: TMV resistance protein N-like, partial [Malus domestica]
MD03G1237500	9.53435	12.2753	9.95303	33.5064	56.2366	52.0831	53.6571	58.4015	56.208	Homogentisate 1,2-dioxygenase OS=Arabidopsis thaliana GN=HGO PE=2 SV=2	PREDICTED: homogentisate 1,2-dioxygenase [Pyrus x bretschneideri]
MD14G1205300	39.0151	43.2714	33.7571	14.5129	14.5396	14.8174	9.36216	10.9126	9.808	Peroxisome biogenesis factor 10 OS=Arabidopsis thaliana GN=PEX10 PE=1 SV=1	PREDICTED: probable receptor-like protein kinase At5g61350 [Malus domestica]
MD08G1037500	2.07701	0.147658	0.507158	42.6646	19.5144	38.8614	170.806	67.5258	106.813	Protein DETOXIFICATION 33 OS=Arabidopsis thaliana GN=DTX33 PE=2 SV=1	PREDICTED: protein DETOXIFICATION 33-like [Malus domestica]
MD12G1033500	1.78839	0.391198	1.79152	25.7377	15.2435	23.4716	25.893	22.8836	19.3065	G-type lectin S-receptor-like serine/threonine-protein kinase At2g19130 OS=Arabidopsis thaliana GN=At2g19130 PE=2 SV=1	PREDICTED: G-type lectin S-receptor-like serine/threonine-protein kinase At2g19130 [Pyrus x bretschneideri]
MD14G1169600	1.07111	1.32256	2.03727	14.6708	7.28917	12.0719	36.9804	30.0399	21.7299	Cytochrome P450 71A1 OS=Persea americana GN=CYP71A1 PE=1 SV=2	PREDICTED: cytochrome P450 71A1-like isoform X1 [Pyrus x bretschneideri]
MD05G1122600	38.7229	50.8079	58.6847	173.085	161.055	225.107	227.003	250.476	166.126	Probable aquaporin PIP2-8 OS=Arabidopsis thaliana GN=PIP2-8 PE=1 SV=1	PREDICTED: probable aquaporin PIP2-8 [Malus domestica]
novel.553	5.53591	8.12847	4.41916	0.320023	0.381043	0.737088	0.101801	0.450227	0.204667	#N/A	#N/A
MD13G1024300	5.40897	5.57494	4.44202	1.15666	1.02726	0.567751	1.66779	1.16709	2.14339	Probable sulfate transporter 3.3 OS=Arabidopsis thaliana GN=SULTR3;3 PE=2 SV=2	PREDICTED: probable sulfate transporter 3.3 [Malus domestica]
MD02G1013900	14.4307	39.1262	46.8195	238.686	424.95	376.229	517.836	492.165	488.117	Methanol O-anthraniloyltransferase OS=Vitis labrusca GN=AMAT PE=1 SV=1	PREDICTED: methanol O-anthraniloyltransferase-like [Malus domestica]
MD00G1130900	33.1328	47.352	57.8521	167.885	204.042	259.966	282.165	254.895	219.241	Starch synthase 2, chloroplastic/amyloplastic OS=Arabidopsis thaliana GN=SS2 PE=1 SV=1	PREDICTED: LOW QUALITY PROTEIN: granule-bound starch synthase 2, chloroplastic/amyloplastic [Malus domestica]
MD12G1165800	69.588	76.65	88.0098	22.3541	26.8223	16.8025	9.09093	16.4778	29.0135	Vacuolar cation/proton exchanger 3 OS=Arabidopsis thaliana GN=CAX3 PE=1 SV=1	PREDICTED: vacuolar cation/proton exchanger 3-like [Malus domestica]
MD07G1196500	438.003	518.4	525.677	213.578	168.84	176.452	131.601	189.461	233.122	Heat shock cognate 70 kDa protein OS=Petunia hybrida GN=HSP70 PE=2 SV=1	heat shock cognate 70 kDa protein 2-like [Malus domestica]
MD01G1092900	3.41567	2.52302	2.17661	0.286207	0.503181	0.329601	0.398316	0.264241	0.6006	NAC domain-containing protein 91 OS=Arabidopsis thaliana GN=NAC091 PE=1 SV=1	PREDICTED: NAC domain-containing protein 83-like [Malus domestica]
MD03G1224800	1.25577	1.19733	2.88592	35.2746	12.0959	29.5173	19.1423	17.8847	9.72774	Cytochrome P450 CYP72A219 OS=Panax ginseng PE=2 SV=1	PREDICTED: cytochrome P450 CYP72A219-like [Malus domestica]
MD13G1228000	0.14702	0.219489	0.323089	3.53558	2.2693	4.68965	7.69705	4.5466	5.29954	--	hypothetical protein PRUPE_1G040900 [Prunus persica]
MD12G1208500	152.817	70.8591	121.915	18.322	24.3919	14.1982	8.21991	46.7753	30.7486	Calmodulin-binding protein 60 B OS=Arabidopsis thaliana GN=CBP60B PE=2 SV=1	PREDICTED: calmodulin-binding protein 60 B-like isoform X1 [Malus domestica]
MD16G1200000	5.5594	4.18176	3.97026	0.359394	0.37443	0.591263	1.25757	0.379212	0.976845	Early light-induced protein 1, chloroplastic OS=Arabidopsis thaliana GN=ELIP1 PE=1 SV=1	PREDICTED: early light-induced protein 1, chloroplastic-like [Malus domestica]
MD03G1182800	10.8368	11.6938	10.2339	2.897	2.56868	3.19426	1.71565	5.00786	2.20752	Receptor kinase-like protein Xa21 OS=Oryza sativa subsp. indica GN=XA21 PE=1 SV=1	PREDICTED: putative receptor-like protein kinase At3g47110 [Malus domestica]
MD09G1184000	14.1318	13.9903	34.0122	359.704	128.517	224.362	389.795	336.111	269.695	Transcription repressor MYB4 OS=Arabidopsis thaliana GN=MYB4 PE=1 SV=1	uncharacterized protein LOC103453608 [Malus domestica]
MD11G1241700	20.7573	15.2726	18.2406	46.9193	53.5125	46.709	38.02	59.3298	73.9508	Protochlorophyllide reductase, chloroplastic OS=Cucumis sativus GN=PORA PE=2 SV=1	PREDICTED: protochlorophyllide reductase, chloroplastic [Pyrus x bretschneideri]
MD07G1004600	105.991	121.803	200.52	579.367	585.221	677.009	621.646	732.881	639.657	Linoleate 13S-lipoxygenase 2-1, chloroplastic OS=Solanum tuberosum GN=LOX2.1 PE=1 SV=1	lipoxygenase [Malus domestica]
MD07G1162700	1.48024	0.985596	1.09314	0.0930246	0.064611	0.0892739	0.0172617	0.152684	0.17352	Protein NTM1-like 9 OS=Arabidopsis thaliana GN=NTL9 PE=1 SV=1	PREDICTED: NAC domain-containing protein 68-like [Malus domestica]
MD00G1192900	15.3718	8.07239	9.61961	2.46656	1.96026	1.4931	0.739356	4.67128	3.3799	Probable LRR receptor-like serine/threonine-protein kinase At3g47570 OS=Arabidopsis thaliana GN=At3g47570 PE=2 SV=1	PREDICTED: probable LRR receptor-like serine/threonine-protein kinase At3g47570 [Malus domestica]
MD15G1080600	14.34	9.89676	9.98183	2.53046	1.09161	1.98069	3.43362	3.115	5.22163	Subtilisin-like protease SBT1.9 OS=Arabidopsis thaliana GN=SBT1.9 PE=2 SV=1	PREDICTED: subtilisin-like protease SBT1.9 [Malus domestica]
MD03G1273300	4.77942	3.82769	11.956	65.092	49.6614	92.0371	98.7735	94.901	65.2559	Gibberellin receptor GID1B OS=Arabidopsis thaliana GN=GID1B PE=1 SV=1	uncharacterized protein LOC103432477 [Malus domestica]
MD00G1167000	2.40017	4.36818	6.53269	46.6709	23.195	38.6801	106.035	89.0877	63.8924	Cytochrome P450 71A1 OS=Persea americana GN=CYP71A1 PE=1 SV=2	PREDICTED: cytochrome P450 71A1-like [Malus domestica]
MD14G1159700	0.262754	0.512356	0.18331	3.22389	3.05648	2.85876	3.80472	5.07981	3.93287	--	PREDICTED: uncharacterized protein LOC103942790 isoform X2 [Pyrus x bretschneideri]
MD07G1279300	27.1724	41.0121	37.0751	12.0535	10.5205	10.5215	6.31735	9.74719	10.4046	Protein REVEILLE 6 OS=Arabidopsis thaliana GN=RVE6 PE=2 SV=1	uncharacterized protein LOC103439808 [Malus domestica]
MD02G1291300	1.283	1.29975	1.37059	11.2259	5.5249	15.1883	18.1344	11.2757	5.97365	Annexin D3 OS=Arabidopsis thaliana GN=ANN3 PE=2 SV=2	PREDICTED: annexin D3 [Malus domestica]
MD12G1208600	78.6517	80.1268	84.6659	33.134	36.0665	40.2826	23.6705	50.5652	47.3642	Chaperone protein dnaJ 6 OS=Arabidopsis thaliana GN=ATJ6 PE=2 SV=1	PREDICTED: LOW QUALITY PROTEIN: dnaJ homolog subfamily B member 3-like [Malus domestica]
MD15G1348800	19.4178	17.002	23.0986	59.0009	54.446	48.5042	173.573	104.273	86.929	Esterase OS=Hevea brasiliensis PE=1 SV=1	PREDICTED: esterase-like [Pyrus x bretschneideri]
MD03G1258300	4.77108	5.81752	5.41307	1.71774	1.61711	1.21551	1.38251	1.07001	2.91846	Heat stress transcription factor A-2b OS=Oryza sativa subsp. japonica GN=HSFA2B PE=2 SV=1	PREDICTED: heat stress transcription factor A-6b [Pyrus x bretschneideri]
MD04G1069500	105.66	103.062	108.603	51.7815	41.3828	46.7246	38.4953	53.8588	48.8568	Bifunctional dTDP-4-dehydrorhamnose 3,5-epimerase/dTDP-4-dehydrorhamnose reductase OS=Arabidopsis thaliana GN=NRS/ER PE=1 SV=1	PREDICTED: bifunctional dTDP-4-dehydrorhamnose 3,5-epimerase/dTDP-4-dehydrorhamnose reductase [Malus domestica]
MD17G1274200	39.9739	35.1871	43.6861	15.5272	16.7161	15.2323	9.15596	22.2997	19.6306	TMV resistance protein N OS=Nicotiana glutinosa GN=N PE=1 SV=1	PREDICTED: TMV resistance protein N-like isoform X3 [Malus domestica]
MD15G1260000	23.208	22.4676	23.4491	4.31146	1.30198	3.59793	0.97396	1.84606	0.209798	Transcription factor RADIALIS OS=Antirrhinum majus GN=RAD PE=1 SV=1	PREDICTED: protein RADIALIS-like 4 [Malus domestica]
MD04G1064700	13.214	15.4083	18.1319	2.65224	4.85167	3.26746	2.16318	3.9103	2.8303	Heat stress transcription factor B-2b OS=Arabidopsis thaliana GN=HSFB2B PE=2 SV=1	PREDICTED: heat stress transcription factor B-2b [Malus domestica]
MD17G1153400	1.16587	0.710431	0.542245	5.57884	8.09741	5.05189	8.17554	12.0329	20.1189	Protein MARD1 OS=Arabidopsis thaliana GN=MARD1 PE=2 SV=2	PREDICTED: uncharacterized protein LOC103454047 [Malus domestica]
MD05G1303400	126.157	106.108	103.574	30.7433	39.2544	21.8539	27.957	39.4167	38.4704	Protein trichome birefringence-like 38 OS=Arabidopsis thaliana GN=TBL38 PE=2 SV=1	PREDICTED: protein trichome birefringence-like 38 [Malus domestica]
MD14G1050600	0.722439	0.885949	0.837914	3.64533	4.56549	4.42132	6.9514	10.3115	13.5849	F-box/kelch-repeat protein At2g44130 OS=Arabidopsis thaliana GN=At2g44130 PE=2 SV=2	PREDICTED: F-box/kelch-repeat protein At2g44130-like [Pyrus x bretschneideri]
MD16G1138900	15.1469	18.3921	20.3666	45.7059	45.8109	43.297	48.0388	54.2354	43.4368	ATP-citrate synthase alpha chain protein 3 OS=Oryza sativa subsp. japonica GN=ACLA-3 PE=2 SV=1	PREDICTED: ATP-citrate synthase alpha chain protein 3, partial [Malus domestica]
MD15G1237100	0.452199	0.241107	0.165625	1.73153	5.51307	5.55354	2.90074	0.737065	1.1229	Phospholipase D delta OS=Arabidopsis thaliana GN=PLDDELTA PE=1 SV=2	PREDICTED: phospholipase D delta [Malus domestica]
MD07G1210700	29.2103	41.7148	27.1714	133.802	583.833	312.834	76.6339	71.8346	173.097	17.3 kDa class I heat shock protein OS=Glycine max GN=HSP17.3-B PE=3 SV=1	PREDICTED: 18.1 kDa class I heat shock protein-like [Malus domestica]
MD15G1407200	16.4113	18.3212	15.6839	6.2383	6.63982	7.2618	5.40623	7.80388	6.94411	Transcription factor bHLH80 OS=Arabidopsis thaliana GN=BHLH80 PE=2 SV=1	PREDICTED: transcription factor bHLH80-like [Malus domestica]
MD14G1124200	5.10323	3.2088	3.81274	0.803261	0.363856	0.764171	1.69144	0.472911	1.73937	Oligopeptide transporter 7 OS=Arabidopsis thaliana GN=OPT7 PE=2 SV=1	PREDICTED: oligopeptide transporter 7 [Malus domestica]
MD14G1137200	0.904564	0.239488	1.21861	12.3501	6.55899	9.65653	60.3098	26.9102	45.1842	Transcription factor bHLH14 OS=Arabidopsis thaliana GN=BHLH14 PE=2 SV=1	PREDICTED: transcription factor MYC2-like [Malus domestica]
MD09G1263000	6.62761	8.77348	10.7143	2.15913	1.58485	1.58231	1.63903	1.69139	2.08696	--	PREDICTED: protein OPI10 homolog [Malus domestica]
MD04G1003400	36.0783	23.8891	51.0131	226.094	150.404	341.044	353.351	299.907	247.867	Polyketide synthase 1 OS=Rubus idaeus GN=PKS1 PE=1 SV=1	polyketide synthase 5-like [Malus domestica]
MD12G1174800	6.03973	5.94519	4.86186	0.969065	0.712664	1.18164	0.888525	0.280687	1.02077	Nudix hydrolase 15, mitochondrial OS=Arabidopsis thaliana GN=NUDT15 PE=1 SV=2	PREDICTED: nudix hydrolase 15, mitochondrial-like isoform X1 [Malus domestica]
MD10G1269300	8.43481	9.78913	7.19287	0.882568	1.53249	2.11746	0.900736	1.58439	1.07008	Bidirectional sugar transporter SWEET2a OS=Oryza sativa subsp. japonica GN=SWEET2A PE=2 SV=1	PREDICTED: bidirectional sugar transporter SWEET2a-like [Malus domestica]
MD13G1080300	126.195	129.809	121.052	34.5757	24.1566	45.4559	28.2376	29.8818	29.5648	Protein NRT1/ PTR FAMILY 2.13 OS=Arabidopsis thaliana GN=NPF2.13 PE=1 SV=1	PREDICTED: protein NRT1/ PTR FAMILY 2.13-like [Malus domestica]
MD02G1255400	106.859	115.741	113.321	47.2232	45.3075	56.2265	53.9876	50.9885	49.4925	Copper transport protein CCH OS=Arabidopsis thaliana GN=CCH PE=1 SV=1	PREDICTED: copper transport protein ATX1 [Malus domestica]
MD05G1191500	5.45431	2.99238	3.13897	0.835964	0.673745	0.635751	2.10732	0.718408	1.21805	MDIS1-interacting receptor like kinase 2 OS=Arabidopsis thaliana GN=MIK2 PE=1 SV=3	PREDICTED: MDIS1-interacting receptor like kinase 2-like [Malus domestica]
MD02G1145800	47.2954	36.721	50.9516	8.29148	2.37753	6.74534	7.36822	12.1733	7.57704	Protein RADIALIS-like 1 OS=Arabidopsis thaliana GN=RL1 PE=2 SV=1	PREDICTED: protein RADIALIS-like 3 [Pyrus x bretschneideri]
MD15G1160600	12.0459	9.81964	8.88937	1.57652	3.0112	1.55077	2.45002	2.74931	3.19801	Probable protein phosphatase 2C 27 OS=Oryza sativa subsp. japonica GN=Os02g0799000 PE=2 SV=1	PREDICTED: probable protein phosphatase 2C 27 isoform X1 [Malus domestica]
MD17G1069600	48.3835	59.2315	62.9851	124.447	133.297	143.459	103.03	198.699	163.739	Zinc finger protein CONSTANS-LIKE 2 OS=Arabidopsis thaliana GN=COL2 PE=1 SV=1	COL domain class transcription factor [Malus domestica]
MD10G1179300	73.8738	122.625	133.055	364.558	387.204	391.346	472.695	471.275	473.002	--	PREDICTED: uncharacterized protein LOC103445599 [Malus domestica]
MD14G1052500	5.4025	5.84339	5.65357	0.82858	0.345298	0.572524	0.369005	0.713987	0.649137	Dirigent protein 21 OS=Arabidopsis thaliana GN=DIR21 PE=3 SV=1	PREDICTED: dirigent protein 22-like [Pyrus x bretschneideri]
MD14G1234600	1.71186	4.42541	3.64796	22.4995	15.7355	32.4269	37.7984	28.6292	33.2093	Myb-related protein 308 OS=Antirrhinum majus GN=MYB308 PE=2 SV=1	myb-related protein 308-like [Malus domestica]
MD05G1169600	2.11525	0.749932	2.70993	15.0057	40.8045	15.4332	29.0794	37.2055	45.6825	Cytochrome P450 82G1 OS=Arabidopsis thaliana GN=CYP82G1 PE=1 SV=1	PREDICTED: cytochrome P450 82G1-like [Malus domestica]
MD16G1016800	26.8867	19.096	28.9378	73.8145	66.2271	86.0034	67.881	97.0975	67.8948	Alpha,alpha-trehalose-phosphate synthase [UDP-forming] 6 OS=Arabidopsis thaliana GN=TPS6 PE=1 SV=2	PREDICTED: alpha,alpha-trehalose-phosphate synthase [UDP-forming] 6 [Malus domestica]
MD04G1202000	34.0265	25.8929	23.0146	7.38965	10.0587	8.0824	6.86304	13.5307	10.3484	Autophagy-related protein 18a OS=Arabidopsis thaliana GN=ATG18A PE=1 SV=1	PREDICTED: autophagy-related protein 18a-like [Malus domestica]
novel.487	0.200747	0.713572	1.40518	15.6898	6.79597	13.204	34.1692	21.1183	14.6011	#N/A	#N/A
MD13G1013700	4.68108	3.66408	4.31281	24.019	11.983	26.7299	33.5717	26.5061	25.2583	Protein NRT1/ PTR FAMILY 8.3 OS=Arabidopsis thaliana GN=NPF8.3 PE=1 SV=1	PREDICTED: protein NRT1/ PTR FAMILY 8.3-like [Pyrus x bretschneideri]
MD14G1052400	6.36282	4.58715	6.12709	0.384848	0	0	0.342781	0.378998	0.603005	Dirigent protein 19 OS=Arabidopsis thaliana GN=DIR19 PE=2 SV=1	PREDICTED: dirigent protein 22-like [Pyrus x bretschneideri]
MD11G1230700	3.07036	1.7394	2.48342	10.3216	10.1309	7.61589	9.86311	8.19159	6.54832	Transcription factor bHLH123 OS=Arabidopsis thaliana GN=BHLH123 PE=2 SV=1	PREDICTED: transcription factor bHLH123-like isoform X1 [Malus domestica]
MD16G1022100	5.74266	3.83527	6.50633	1.2401	0.587264	0.746515	0.690341	0.832669	1.35636	Probable pectinesterase/pectinesterase inhibitor 6 OS=Arabidopsis thaliana GN=PME6 PE=2 SV=1	PREDICTED: pectinesterase-like [Pyrus x bretschneideri]
MD17G1030600	5.30065	5.54308	4.59267	1.39514	1.45351	1.43755	1.51243	0.949102	2.17779	High affinity nitrate transporter 2.7 OS=Arabidopsis thaliana GN=NRT2.7 PE=2 SV=1	high affinity nitrate transporter [Pyrus betulifolia]
MD04G1206900	1.06388	1.59442	1.34802	11.8785	4.63116	11.5465	12.3178	13.8929	8.92737	Mevalonate kinase OS=Arabidopsis thaliana GN=At5g27450 PE=2 SV=1	PREDICTED: mevalonate kinase-like [Malus domestica]
MD10G1077900	15.8845	7.76036	26.9249	122.507	100.734	129.617	146.286	193.671	143.012	BURP domain protein USPL1 OS=Arabidopsis thaliana GN=USPL1 PE=2 SV=1	PREDICTED: BURP domain protein USPL1-like isoform X1 [Pyrus x bretschneideri]
MD05G1065500	3.0265	13.1554	6.12316	0.12378	0	0.285093	0	0.0761864	0	Protein RADIALIS-like 2 OS=Arabidopsis thaliana GN=RL2 PE=2 SV=1	PREDICTED: transcription factor RADIALIS-like [Malus domestica]
MD03G1237300	6.31618	8.81217	6.49037	21.3036	42.9179	34.7504	39.9505	33.7373	36.8709	Homogentisate 1,2-dioxygenase OS=Arabidopsis thaliana GN=HGO PE=2 SV=2	PREDICTED: homogentisate 1,2-dioxygenase [Pyrus x bretschneideri]
MD11G1299800	132.929	132.449	136.764	28.8395	10.2218	28.2473	14.8959	20.3126	17.9685	Monothiol glutaredoxin-S9 OS=Arabidopsis thaliana GN=GRXS9 PE=3 SV=1	PREDICTED: monothiol glutaredoxin-S11 [Malus domestica]
MD09G1147100	5.26388	5.21134	9.58436	24.7818	30.238	26.9321	51.8266	42.8051	64.9036	Glutathione S-transferase F9 OS=Arabidopsis thaliana GN=GSTF9 PE=1 SV=1	PREDICTED: LOW QUALITY PROTEIN: glutathione S-transferase F9-like [Malus domestica]
MD04G1216300	57.7334	82.897	66.3314	190.455	384.87	454.574	296.524	166.937	204.807	#N/A	#N/A
MD15G1331300	187.42	86.1978	162.157	37.4916	22.8097	26.5195	40.7946	61.1638	51.9266	Probable WRKY transcription factor 51 OS=Arabidopsis thaliana GN=WRKY51 PE=1 SV=1	PREDICTED: probable WRKY transcription factor 51 isoform X1 [Malus domestica]
MD17G1058900	16.5979	14.9801	14.5415	5.72054	7.10723	5.81283	5.07481	4.82019	6.50509	--	PREDICTED: uncharacterized protein LOC103429153 [Malus domestica]
MD01G1121000	4.58665	3.91288	4.62129	0.746402	0.691226	0.191015	0.923353	0.816729	1.16023	--	PREDICTED: uncharacterized protein LOC103434522 [Malus domestica]
MD05G1025100	0.121337	0.232904	0.0592556	1.74557	1.54717	1.68019	1.47935	2.02051	1.57456	#N/A	#N/A
MD12G1003600	5.55853	6.91625	7.15972	2.00135	0.955663	1.00834	1.57833	0.692905	0.723298	Glutamate dehydrogenase 1 OS=Arabidopsis thaliana GN=GDH1 PE=2 SV=1	PREDICTED: glutamate dehydrogenase 1 [Malus domestica]
MD08G1031600	12.5048	17.1488	16.0614	93.461	40.823	99.8777	41.6842	61.6692	28.3183	--	PREDICTED: uncharacterized protein LOC103955406 [Pyrus x bretschneideri]
MD05G1130500	24.0378	24.1861	23.8711	2.66711	6.43216	2.16142	1.59471	6.62723	11.6636	NAC domain-containing protein 35 OS=Arabidopsis thaliana GN=NAC035 PE=1 SV=2	PREDICTED: NAC transcription factor 29-like [Malus domestica]
MD08G1015500	0.355462	0.53371	0.472168	1.57533	1.83207	2.25013	2.63767	1.36798	2.62413	Auxin response factor 5 OS=Arabidopsis thaliana GN=ARF5 PE=1 SV=3	PREDICTED: auxin response factor 5-like [Malus domestica]
MD16G1022000	40.3492	52.3086	34.4024	16.2761	13.7357	11.8502	13.825	18.5134	30.7016	Probable pectinesterase/pectinesterase inhibitor 6 OS=Arabidopsis thaliana GN=PME6 PE=2 SV=1	PREDICTED: pectinesterase-like [Pyrus x bretschneideri]
MD00G1089200	7.68426	8.98096	8.61231	31.613	19.2353	25.2144	42.2692	27.7852	22.5286	CLP protease regulatory subunit CLPX3, mitochondrial OS=Arabidopsis thaliana GN=CLPX3 PE=2 SV=1	PREDICTED: CLP protease regulatory subunit CLPX3, mitochondrial-like [Malus domestica]
MD04G1154400	3.28552	1.76477	3.9221	40.0283	11.1879	29.0063	109.582	31.2953	24.3004	Probable 2-oxoglutarate-dependent dioxygenase At3g111800 OS=Arabidopsis thaliana GN=At3g11180 PE=2 SV=1	PREDICTED: protein SRG1-like [Malus domestica]
MD01G1093200	8.17063	13.3346	12.7433	3.10657	3.7278	2.93872	2.06907	2.08282	4.15979	Protein NTM1-like 9 OS=Arabidopsis thaliana GN=NTL9 PE=1 SV=1	PREDICTED: NAC domain-containing protein 62-like [Malus domestica]
MD17G1274300	34.7335	27.9395	41.0259	14.0642	13.7178	12.5271	6.72832	18.4177	13.7525	Disease resistance protein ADR2 OS=Arabidopsis thaliana GN=ADR2 PE=2 SV=1	PREDICTED: disease resistance protein RML1A-like isoform X1 [Malus domestica]
MD02G1299800	0.31366	0.191131	0.481414	3.38666	2.48588	2.52622	2.95649	2.93724	1.42137	Acyl-CoA--sterol O-acyltransferase 1 OS=Arabidopsis thaliana GN=ASAT1 PE=1 SV=1	PREDICTED: acyl-CoA--sterol O-acyltransferase 1-like [Malus domestica]
MD03G1069400	2.94858	2.10667	2.6999	7.62899	10.4546	7.76493	15.7189	14.9247	15.9783	Beta-glucosidase 13 OS=Oryza sativa subsp. japonica GN=BGLU13 PE=2 SV=2	PREDICTED: beta-glucosidase 13-like [Malus domestica]
MD15G1067200	20.0549	18.2284	19.3249	9.01689	6.86494	8.35379	5.98484	4.30473	6.37195	Serine carboxypeptidase-like 18 OS=Arabidopsis thaliana GN=SCPL18 PE=2 SV=2	PREDICTED: serine carboxypeptidase-like 13 [Pyrus x bretschneideri]
MD01G1174400	2.26435	0.424036	2.48132	18.4043	16.3575	18.9278	17.7181	18.3932	18.8726	Glutamate dehydrogenase 2 OS=Arabidopsis thaliana GN=GDH2 PE=1 SV=1	PREDICTED: glutamate dehydrogenase 2 [Pyrus x bretschneideri]
MD17G1235000	4.40294	2.27562	3.79815	0.496846	0.345089	0.699326	0.0614635	0.713554	0.339818	Probable aminotransferase TAT2 OS=Arabidopsis thaliana GN=At5g53970 PE=2 SV=1	PREDICTED: probable aminotransferase TAT2 isoform X1 [Pyrus x bretschneideri]
MD05G1266000	9.47876	12.3935	12.3122	4.05653	4.72173	3.96277	1.77541	2.75508	4.54002	Berberine bridge enzyme-like 8 OS=Arabidopsis thaliana GN=At1g30700 PE=2 SV=1	PREDICTED: flavin-dependent oxidoreductase FOX5-like [Malus domestica]
MD14G1239400	101.836	110.496	148.348	297.773	542.026	447.47	198.886	269.912	255.309	Mitogen-activated protein kinase kinase 9 OS=Arabidopsis thaliana GN=MKK9 PE=1 SV=1	PREDICTED: mitogen-activated protein kinase kinase 9-like [Malus domestica]
MD09G1052400	124.53	117.941	147.102	60.2982	49.4383	42.9723	35.5762	67.693	68.6733	Uncharacterized protein At5g19025 OS=Arabidopsis thaliana GN=At5g19025 PE=2 SV=3	PREDICTED: uncharacterized protein LOC103445873 [Malus domestica]
MD05G1171900	86.2243	70.3967	119.46	276.641	297.657	249.392	284.689	377.574	417.539	Membrane protein of ER body-like protein OS=Arabidopsis thaliana GN=MEBL PE=2 SV=1	PREDICTED: membrane protein of ER body-like protein [Pyrus x bretschneideri]
MD12G1247500	25.8835	24.4148	28.6536	10.572	13.0642	10.3148	6.57187	16.0869	10.1887	TMV resistance protein N OS=Nicotiana glutinosa GN=N PE=1 SV=1	TIR-NBS-LRR disease resistance protein [Malus domestica]
MD03G1143800	58.9766	86.0013	42.8586	17.3606	13.05	15.5639	3.42533	13.3906	9.83785	Protein BIC1 OS=Arabidopsis thaliana GN=BIC1 PE=1 SV=1	protein BIC1 [Prunus persica]
MD17G1139600	8.92574	12.4016	12.4357	52.9296	28.0712	49.3674	58.1455	54.6439	40.1862	--	PREDICTED: uncharacterized protein LOC103405180 isoform X1 [Malus domestica]
MD01G1210600	33.8998	37.3681	52.9618	203.458	108.391	169.997	173.608	165.089	109.13	UDP-glycosyltransferase 88A1 OS=Arabidopsis thaliana GN=UGT88A1 PE=2 SV=1	PREDICTED: UDP-glycosyltransferase 88A1-like [Malus domestica]
MD07G1171700	21.9377	22.0303	19.835	48.4229	39.8767	49.3791	47.1996	47.5478	36.1799	--	PREDICTED: ATPase ASNA1 homolog [Malus domestica]
MD08G1179900	0	0	0	1.52356	0.623581	1.02349	5.57347	2.41135	2.80132	Probable beta-D-xylosidase 7 OS=Arabidopsis thaliana GN=BXL7 PE=2 SV=2	PREDICTED: probable beta-D-xylosidase 7 [Malus domestica]
MD09G1111200	10.577	4.8034	6.96417	1.78521	1.57739	1.45733	1.53472	1.7247	1.82096	WRKY transcription factor 6 OS=Arabidopsis thaliana GN=WRKY6 PE=1 SV=1	PREDICTED: probable WRKY transcription factor 31 [Malus domestica]
MD15G1365900	7.06428	14.8946	5.14799	0.440115	1.34283	0.362031	0.105002	0.503083	0.527756	Probable trehalose-phosphate phosphatase I OS=Arabidopsis thaliana GN=TPPI PE=3 SV=1	PREDICTED: probable trehalose-phosphate phosphatase C [Malus domestica]
MD09G1034400	14.2145	8.30577	13.9921	82.3055	36.0917	107.688	62.4562	101.465	46.4455	Formate dehydrogenase, mitochondrial OS=Solanum tuberosum GN=FDH1 PE=1 SV=2	PREDICTED: formate dehydrogenase 1, mitochondrial-like [Pyrus x bretschneideri]
MD09G1082100	13.6383	15.2293	20.757	46.3461	42.0676	42.2597	57.2196	57.4038	71.1615	Cinnamoyl-CoA reductase-like SNL6 OS=Oryza sativa subsp. japonica GN=SNL6 PE=3 SV=1	PREDICTED: cinnamoyl-CoA reductase 2-like [Malus domestica]
MD04G1209700	0.122318	0.14609	0.31062	2.41628	1.22585	1.86315	8.53846	3.23308	3.12755	Sodium/hydrogen exchanger 2 OS=Arabidopsis thaliana GN=NHX2 PE=2 SV=2	PREDICTED: sodium/hydrogen exchanger 1-like [Malus domestica]
MD00G1145700	2.2732	3.32882	2.67479	22.2603	7.6718	26.308	38.8017	22.7281	14.9687	Plasma membrane ATPase OS=Oryza sativa subsp. japonica GN=Os04g0656100 PE=2 SV=1	PREDICTED: magnesium-transporting ATPase, P-type 1-like [Malus domestica]
MD07G1301800	206.901	183.677	210.122	86.9139	97.0338	67.9627	36.7413	68.27	57.5679	NAC domain-containing protein 91 OS=Arabidopsis thaliana GN=NAC091 PE=1 SV=1	uncharacterized LOC103439966 [Malus domestica]
MD06G1090200	5.11675	2.78623	4.99757	0.561016	0.779317	0.430717	0.676667	0.230204	0.941825	Heavy metal-associated isoprenylated plant protein 39 OS=Arabidopsis thaliana GN=HIPP39 PE=2 SV=1	PREDICTED: uncharacterized protein LOC103439249 [Malus domestica]
MD13G1116100	0.642154	0.238184	0.463581	6.64231	2.22346	4.14227	7.28853	5.46096	3.40837	Geraniol 8-hydroxylase OS=Catharanthus roseus GN=CYP76B6 PE=1 SV=1	PREDICTED: geraniol 8-hydroxylase-like [Malus domestica]
MD06G1117900	3.71307	3.94458	4.24242	18.3521	11.5346	12.4035	11.3216	19.7027	20.8088	--	PREDICTED: uncharacterized protein LOC103437417 [Malus domestica]
MD01G1093000	2.28224	3.69255	1.896	0.540731	0.328623	0.311358	0.225762	0.49923	0.403454	Protein FEZ OS=Arabidopsis thaliana GN=FEZ PE=2 SV=1	PREDICTED: NAC domain-containing protein 62-like [Malus domestica]
MD01G1237000	10.2204	9.30247	11.5409	29.4341	21.7243	31.191	35.4231	31.5736	23.9581	Syntaxin-22 OS=Arabidopsis thaliana GN=SYP22 PE=1 SV=1	PREDICTED: syntaxin-22-like [Pyrus x bretschneideri]
MD01G1205800	2.97313	4.21981	4.65134	29.5577	10.7827	32.5297	28.0024	35.8014	14.5171	Uncharacterized protein At1g76660 OS=Arabidopsis thaliana GN=At1g76660 PE=2 SV=1	PREDICTED: uncharacterized protein LOC103442931 [Malus domestica]
MD03G1131700	22.452	14.0243	17.9931	6.04323	6.06712	4.99817	4.28166	8.52128	7.50136	#N/A	#N/A
MD05G1319900	0.125507	0.0535348	0.122583	3.17992	1.85301	4.71721	2.10024	4.71065	3.25733	#N/A	#N/A
MD09G1146700	17.1461	15.561	14.8356	6.35194	7.86408	6.16691	3.04446	6.3115	5.45132	--	PREDICTED: transmembrane protein 56-B-like [Malus domestica]
MD15G1407300	6.16626	7.26442	7.59999	17.2121	14.6151	18.1154	18.9878	17.0358	23.6032	UDP-glycosyltransferase 88F4 OS=Malus domestica GN=UGT88F4 PE=2 SV=1	UDP glycosyltransferases 88F4 [Malus domestica]
MD03G1141300	0.0655492	0.0838801	0.0320112	1.43561	1.55432	1.06976	1.00289	1.73258	1.73273	#N/A	#N/A
MD14G1040300	62.2899	40.2247	64.6097	213.363	145.282	167.54	135.471	221.695	152.399	E3 ubiquitin-protein ligase PUB23 OS=Arabidopsis thaliana GN=PUB23 PE=1 SV=1	PREDICTED: E3 ubiquitin-protein ligase PUB23-like [Pyrus x bretschneideri]
MD14G1173400	5.00333	4.81712	4.3283	14.6719	22.8966	13.2909	8.33846	21.235	21.0926	--	PREDICTED: acidic mammalian chitinase-like [Malus domestica]
MD01G1105500	12.4461	13.3011	11.6608	35.9613	24.7856	34.3218	40.8789	38.9405	26.4633	--	PREDICTED: ATPase ASNA1 homolog [Malus domestica]
MD09G1180000	6.29871	5.53979	5.80917	14.2698	11.4816	12.6336	15.3467	24.9265	23.506	--	uncharacterized protein LOC110768908 [Prunus avium]
MD08G1091700	25.8994	34.9388	34.7494	78.7399	77.3832	109.47	149.71	162.78	153.422	F-box protein GID2 OS=Arabidopsis thaliana GN=GID2 PE=1 SV=1	PREDICTED: uncharacterized protein LOC103441251 [Malus domestica]
MD13G1186600	8.87717	2.97819	10.0343	0.899501	0.758632	0.295966	2.14601	1.8982	2.30106	Protein FANTASTIC FOUR 3 OS=Arabidopsis thaliana GN=FAF3 PE=2 SV=1	PREDICTED: protein FANTASTIC FOUR 1-like [Malus domestica]
MD17G1225700	5.09329	9.47394	5.88773	19.076	62.6367	53.183	14.6728	9.76454	17.4919	Probable mediator of RNA polymerase II transcription subunit 37c OS=Arabidopsis thaliana GN=MED37C PE=1 SV=1	PREDICTED: probable mediator of RNA polymerase II transcription subunit 37c [Gossypium arboreum]
MD03G1271200	5.56241	4.42108	7.72747	17.5962	17.1886	23.4079	21.9697	17.2411	16.9703	--	PREDICTED: BSD domain-containing protein 1 [Malus domestica]
MD13G1034200	5.59062	7.32519	6.79285	17.0239	16.1564	13.6785	11.8941	16.8274	19.1301	Putative zinc finger protein At1g68190 OS=Arabidopsis thaliana GN=At1g68190 PE=2 SV=1	PREDICTED: putative zinc finger protein At1g68190 isoform X4 [Pyrus x bretschneideri]
MD06G1016200	0.863165	1.17819	1.78729	5.15977	26.4766	10.4157	27.535	23.2165	32.6905	Benzyl alcohol O-benzoyltransferase OS=Nicotiana tabacum GN=HSR201 PE=1 SV=1	alcohol acyl transferase [Malus domestica]
novel.192	1.05019	1.45284	1.88513	9.28795	4.59699	6.62544	5.15687	4.6214	4.20165	#N/A	#N/A
MD00G1191600	58.1834	59.4151	99.5618	243.751	194.514	258.184	216.676	310.337	290.954	Phospholipase A1-IIdelta OS=Arabidopsis thaliana GN=At2g42690 PE=1 SV=1	PREDICTED: phospholipase A1-IIdelta-like [Malus domestica]
MD05G1301600	16.5846	4.4727	7.31537	0.459485	0.670193	0.952471	0.102315	0.452501	1.0285	Heavy metal-associated isoprenylated plant protein 28 OS=Arabidopsis thaliana GN=HIPP28 PE=3 SV=1	PREDICTED: heavy metal-associated isoprenylated plant protein 20-like [Malus domestica]
MD15G1023700	2.85861	1.42257	4.03294	17.3568	11.1908	14.3335	58.6566	31.8604	37.6679	Jasmonate O-methyltransferase OS=Arabidopsis thaliana GN=JMT PE=1 SV=3	PREDICTED: jasmonate O-methyltransferase-like [Malus domestica]
MD12G1038600	326.032	276.625	286.888	117	72.3645	53.8347	35.6069	133.35	72.7722	NDR1/HIN1-like protein 3 OS=Arabidopsis thaliana GN=NHL3 PE=1 SV=1	PREDICTED: NDR1/HIN1-Like protein 3-like [Malus domestica]
MD05G1013400	3.22907	2.57507	2.39968	8.01861	7.16065	10.9354	8.86052	20.484	14.946	Alcohol dehydrogenase 1 OS=Pisum sativum PE=1 SV=1	PREDICTED: alcohol dehydrogenase 1-like [Malus domestica]
MD13G1031200	103.016	99.9255	93.9926	52.9597	40.8292	38.7517	35.1385	58.2572	50.7692	--	PREDICTED: transcriptional regulator ATRX homolog [Pyrus x bretschneideri]
MD11G1093000	5.92878	6.81123	6.48557	25.0869	14.0408	25.372	49.4742	38.7382	31.5723	Methylsterol monooxygenase 2-2 OS=Arabidopsis thaliana GN=SMO2-2 PE=2 SV=1	PREDICTED: methylsterol monooxygenase 2-2 [Malus domestica]
MD01G1114300	2.88055	2.68676	2.66341	12.1392	6.52974	11.5105	16.5637	14.6997	10.9649	Probable adenylate kinase 1, chloroplastic OS=Oryza sativa subsp. japonica GN=Os03g0130400 PE=2 SV=1	PREDICTED: probable adenylate kinase 6, chloroplastic [Malus domestica]
MD16G1023400	19.1401	18.325	32.4723	104.471	61.9656	110.575	139.338	110.875	106.599	Uncharacterized protein At4g22758 OS=Arabidopsis thaliana GN=At4g22758 PE=2 SV=1	PREDICTED: uncharacterized protein At4g22758-like [Pyrus x bretschneideri]
MD15G1290300	16.7833	37.4142	29.5332	123.588	84.075	137.346	85.5587	118.714	107.905	Cytochrome P450 81E8 OS=Medicago truncatula GN=CYP81E8 PE=2 SV=1	PREDICTED: cytochrome P450 81E8-like isoform X1 [Pyrus x bretschneideri]
MD13G1041700	2.80869	2.39609	5.48653	65.0172	12.5661	41.8029	67.4	38.3212	6.5567	--	PREDICTED: uncharacterized protein LOC103451648 [Malus domestica]
MD03G1146300	33.2241	20.3907	26.3168	9.36539	4.70437	4.67043	7.82032	9.93329	15.9564	Ankyrin repeat-containing protein At5g02620 OS=Arabidopsis thaliana GN=At5g02620 PE=1 SV=1	PREDICTED: ankyrin repeat-containing protein At5g02620-like isoform X1 [Malus domestica]
MD00G1163400	63.301	31.6086	59.8413	12.2701	12.9393	5.77279	17.9093	9.91614	11.36	Oligopeptide transporter 3 OS=Arabidopsis thaliana GN=OPT3 PE=2 SV=3	PREDICTED: oligopeptide transporter 3-like [Malus domestica]
MD08G1106800	6.64959	8.12976	5.81214	2.30992	2.5771	2.93244	2.89579	2.642	3.52162	--	PREDICTED: uncharacterized protein LOC103959537 isoform X1 [Pyrus x bretschneideri]
MD14G1016100	7.95995	8.75364	9.21186	18.8322	15.5141	18.7896	20.4042	17.3408	16.1773	Polyadenylation and cleavage factor homolog 4 OS=Arabidopsis thaliana GN=PCFS4 PE=1 SV=1	PREDICTED: polyadenylation and cleavage factor homolog 4-like isoform X1 [Malus domestica]
MD11G1146500	5.47718	7.53057	5.6872	29.6181	15.4167	41.7352	41.8744	29.7976	14.0567	Serine carboxypeptidase-like 48 OS=Arabidopsis thaliana GN=SCPL48 PE=2 SV=2	PREDICTED: serine carboxypeptidase-like [Malus domestica]
MD12G1086800	71.9273	44.5298	103.46	546.321	217.935	430.502	668.379	613.942	331.657	Isopentenyl-diphosphate Delta-isomerase II OS=Camptotheca acuminata GN=IPI2 PE=2 SV=1	PREDICTED: isopentenyl-diphosphate Delta-isomerase I-like [Malus domestica]
MD05G1360700	221.837	142.948	153.834	71.4462	56.9274	47.7931	59.4696	86.6286	97.6444	Oligopeptide transporter 3 OS=Arabidopsis thaliana GN=OPT3 PE=2 SV=3	PREDICTED: oligopeptide transporter 3-like [Malus domestica]
MD11G1171700	3.24463	3.58211	3.96132	12.3558	7.72791	10.5008	17.8858	12.3345	17.3372	Proteinaceous RNase P 2 OS=Arabidopsis thaliana GN=PRORP2 PE=1 SV=1	PREDICTED: proteinaceous RNase P 2-like [Pyrus x bretschneideri]
MD03G1050900	8.93673	9.95778	15.9608	52.9139	31.0726	67.8636	92.4323	70.8833	66.3034	Trans-cinnamate 4-monooxygenase OS=Glycine max GN=CYP73A11 PE=2 SV=1	PREDICTED: trans-cinnamate 4-monooxygenase [Pyrus x bretschneideri]
MD02G1317800	53.18	49.5116	65.605	119.409	148.696	196.447	211.428	210.745	198.303	Linoleate 13S-lipoxygenase 2-1, chloroplastic OS=Solanum tuberosum GN=LOX2.1 PE=1 SV=1	lipoxygenase [Malus domestica]
MD01G1094400	13.77	10.0355	13.3151	5.47663	3.9596	4.21371	2.65451	4.7657	4.04222	NAC domain-containing protein 14 OS=Arabidopsis thaliana GN=NAC014 PE=2 SV=1	PREDICTED: NAC domain-containing protein 7-like [Malus domestica]
MD14G1180700	4.69299	2.02779	1.84538	0.157039	0.109073	0.120566	0.291403	0.579946	0.761613	Transcription factor WER OS=Arabidopsis thaliana GN=WER PE=1 SV=1	PREDICTED: transcription factor WER-like [Malus domestica]
MD11G1054000	4.72842	2.34147	3.9282	0.536813	0.94833	0.430054	0.701611	0.574623	1.27996	Transcription factor RF2b OS=Oryza sativa subsp. japonica GN=RF2b PE=1 SV=2	PREDICTED: transcription factor RF2b-like [Malus domestica]
MD12G1194200	10.1128	8.84659	11.2166	3.45952	3.29751	2.37347	4.09757	3.44318	2.63616	Calcium-binding protein CML42 OS=Arabidopsis thaliana GN=CML42 PE=1 SV=1	PREDICTED: calcium-binding protein CML42-like [Malus domestica]
MD05G1298900	6.04974	4.93382	5.23991	11.4703	12.9375	11.6288	10.0055	15.3268	16.0194	CBL-interacting protein kinase 5 OS=Oryza sativa subsp. japonica GN=CIPK5 PE=2 SV=1	CBL-interacting serine/threonine-protein kinase 13 [Malus domestica]
MD08G1249100	0.599913	3.65562	0.669646	13.3228	44.7848	22.2937	9.99806	3.71501	13.7575	22.7 kDa class IV heat shock protein OS=Pisum sativum GN=HSP22.7 PE=2 SV=1	PREDICTED: 22.0 kDa class IV heat shock protein-like [Malus domestica]
MD16G1108600	5.47679	17.1499	10.8872	45.6551	55.9827	66.5339	29.451	17.167	39.8864	Small heat shock protein, chloroplastic (Fragment) OS=Glycine max GN=HSP22 PE=2 SV=1	PREDICTED: small heat shock protein, chloroplastic-like [Pyrus x bretschneideri]
MD09G1173600	1.27381	1.65863	1.63703	9.04023	13.3778	4.77441	9.10344	16.5156	41.3731	Protein MARD1 OS=Arabidopsis thaliana GN=MARD1 PE=2 SV=2	PREDICTED: uncharacterized protein LOC103443632 [Malus domestica]
MD05G1103600	37.8933	27.1199	45.5146	125.362	89.0124	166.17	184.024	172.15	151.176	Serine carboxypeptidase-like 18 OS=Arabidopsis thaliana GN=SCPL18 PE=2 SV=2	PREDICTED: serine carboxypeptidase-like 1 [Malus domestica]
MD07G1251200	27.7234	11.9088	14.7037	4.44983	4.636	2.70728	3.96343	10.5214	8.6073	Disease resistance protein RPP8 OS=Arabidopsis thaliana GN=RPP8 PE=1 SV=2	PREDICTED: disease resistance protein RPP8-like [Malus domestica]
MD15G1225800	103.329	112.908	171.267	420.596	304.543	399.924	438.341	458.426	342.863	Protein TIFY 3B OS=Arabidopsis thaliana GN=TIFY3B PE=1 SV=1	PREDICTED: protein TIFY 3B-like [Malus domestica]
MD17G1223800	4.16491	3.19778	4.61029	1.16256	1.33543	0.92688	1.1616	1.13755	1.53467	Wall-associated receptor kinase 1 OS=Arabidopsis thaliana GN=WAK1 PE=1 SV=2	PREDICTED: non-functional pseudokinase ZED1-like [Malus domestica]
MD09G1283000	5.29957	5.14748	5.86213	12.2565	15.0832	10.9887	19.2632	12.6913	16.111	Probable acyl-activating enzyme 6 OS=Arabidopsis thaliana GN=AAE6 PE=2 SV=1	PREDICTED: probable acyl-activating enzyme 6 [Malus domestica]
MD04G1011100	0.446952	0	0.654812	8.06135	7.59875	8.17839	16.0272	11.5774	18.2592	B2 protein OS=Daucus carota PE=2 SV=1	PREDICTED: uncharacterized protein LOC103435282 [Malus domestica]
MD07G1189600	0	0.0445157	0.152897	2.10639	1.68091	1.96125	0.299385	4.91008	2.90919	--	PREDICTED: uncharacterized protein LOC103434533 [Malus domestica]
MD13G1051400	10.6395	20.0483	40.9959	142.693	132.238	131.254	252	264.41	213.196	E3 ubiquitin-protein ligase RHA2B OS=Arabidopsis thaliana GN=RHA2B PE=1 SV=2	PREDICTED: E3 ubiquitin-protein ligase RNF181-like [Pyrus x bretschneideri]
MD02G1254300	15.0004	6.4366	10.2237	2.56132	2.88196	1.85828	3.5646	1.95485	4.84456	Rust resistance kinase Lr10 OS=Triticum aestivum GN=LRK10 PE=2 SV=1	PREDICTED: rust resistance kinase Lr10-like [Malus domestica]
MD06G1166400	5.11835	7.37236	4.6731	2.08651	2.09083	1.72419	0.797992	2.41164	3.15519	Ferric reduction oxidase 8, mitochondrial OS=Arabidopsis thaliana GN=FRO8 PE=1 SV=1	PREDICTED: ferric reduction oxidase 8, mitochondrial [Malus domestica]
MD06G1120000	19.9599	16.2063	37.4794	111.78	86.9248	85.8667	305.885	163.24	246.139	Transcription factor bHLH14 OS=Arabidopsis thaliana GN=BHLH14 PE=2 SV=1	PREDICTED: transcription factor MYC3-like [Malus domestica]
MD10G1026000	10.3522	15.6841	10.5306	3.35726	4.80456	3.44141	2.6699	5.31359	4.83096	#N/A	#N/A
MD00G1221400	36.6217	40.9404	53.2916	172.472	94.2281	198.065	286.946	206.084	180.593	Trans-cinnamate 4-monooxygenase OS=Glycine max GN=CYP73A11 PE=2 SV=1	PREDICTED: trans-cinnamate 4-monooxygenase [Pyrus x bretschneideri]
MD04G1019600	0.0371676	0	0	1.75572	1.59637	1.61753	1.81259	1.10029	1.21472	Crocetin glucosyltransferase, chloroplastic OS=Gardenia jasminoides GN=UGT75L6 PE=1 SV=1	PREDICTED: crocetin glucosyltransferase, chloroplastic-like [Malus domestica]
MD05G1087200	163.483	105.462	136.246	46.9509	55.9993	33.4753	15.86	55.7878	35.805	Elicitor-responsive protein 1 OS=Oryza sativa subsp. japonica GN=ERG1 PE=1 SV=1	PREDICTED: protein SRC2 homolog isoform X2 [Malus domestica]
MD00G1039500	5.78377	6.76365	8.34664	14.9305	16.66	16.8085	20.3826	20.7498	22.0822	F-box/FBD/LRR-repeat protein At1g13570 OS=Arabidopsis thaliana GN=At1g13570 PE=2 SV=1	PREDICTED: F-box/FBD/LRR-repeat protein At1g13570-like [Malus domestica]
MD02G1030000	116.98	86.3735	147.655	339.009	298.276	507.097	334.255	557.725	416.661	--	PREDICTED: uncharacterized protein LOC103448064 [Malus domestica]
MD16G1048500	4.65616	5.17427	9.81347	1.73642	0.740075	0.93925	3.01708	1.61935	2.00228	Leucoanthocyanidin reductase OS=Desmodium uncinatum GN=LAR PE=1 SV=1	leucoanthocyanidin reductase-like [Malus domestica]
MD11G1162800	49.9634	38.6173	41.4945	16.1714	21.9062	18.7523	12.1833	18.114	19.2692	Zinc finger A20 and AN1 domain-containing stress-associated protein 3 OS=Arabidopsis thaliana GN=SAP3 PE=2 SV=1	C2H2L domain class transcription factor [Malus domestica]
MD13G1080100	92.6866	92.9175	80.3069	23.2948	17.1988	36.9659	21.8513	28.6759	28.5347	--	PREDICTED: protein NRT1/ PTR FAMILY 2.13-like [Malus domestica]
novel.22	1.07164	0.668082	1.61028	5.9472	4.02004	5.25897	16.1594	10.5457	7.68616	#N/A	#N/A
MD16G1023500	24.2751	22.5917	43.2282	163.318	77.6705	158.613	220.169	169.676	133.877	--	PREDICTED: uncharacterized protein LOC108171629 [Malus domestica]
MD07G1163200	26.8814	14.1522	16.3901	6.69845	4.805	5.46938	5.71562	6.62367	10.3542	NAC domain-containing protein 14 OS=Arabidopsis thaliana GN=NAC014 PE=2 SV=1	PREDICTED: NAC domain-containing protein 79-like [Malus domestica]
MD11G1207500	0.647705	0.868305	0.52417	2.65432	2.43419	1.92191	4.28243	3.95227	2.89954	Fimbrin-1 OS=Arabidopsis thaliana GN=FIM1 PE=1 SV=2	PREDICTED: fimbrin-1 [Malus domestica]
MD17G1118600	15.078	23.5279	17.8958	63.6847	42.1833	71.5469	54.1136	54.9881	30.2713	Long chain acyl-CoA synthetase 8 OS=Arabidopsis thaliana GN=LACS8 PE=1 SV=1	PREDICTED: long chain acyl-CoA synthetase 8 [Malus domestica]
MD04G1047700	27.3782	14.5977	75.2342	5.08544	0.92354	2.74019	0.779168	4.76693	2.03644	Endochitinase EP3 OS=Arabidopsis thaliana GN=EP3 PE=1 SV=1	PREDICTED: endochitinase EP3-like [Malus domestica]
MD03G1059700	5.58404	6.11107	5.39889	2.0831	1.81695	2.00841	0.647232	1.66977	1.35545	UDP-glycosyltransferase 87A1 OS=Arabidopsis thaliana GN=UGT87A1 PE=2 SV=1	PREDICTED: UDP-glycosyltransferase 87A1-like [Pyrus x bretschneideri]
novel.446	2.3936	1.18806	1.65775	0.18689	0.116825	0.17218	0.374538	0.506136	0.794829	#N/A	#N/A
MD05G1123600	2.89513	3.77739	4.22491	16.5574	8.19839	16.9117	10.1618	13.6121	7.79215	Zeaxanthin epoxidase, chloroplastic OS=Spinacia oleracea GN=SOVF_077800 PE=1 SV=1	PREDICTED: FAD-dependent urate hydroxylase-like [Malus domestica]
MD13G1212300	9.73295	12.088	11.4209	3.07199	1.53871	3.87792	0.42753	1.45447	0.66118	WAT1-related protein At4g08300 OS=Arabidopsis thaliana GN=At4g08300 PE=2 SV=1	PREDICTED: WAT1-related protein At5g07050-like [Malus domestica]
MD16G1098300	73.3345	50.3969	97.5962	324.869	181.222	288.865	170.289	283.272	144.385	--	PREDICTED: lipase-like [Malus domestica]
MD10G1281800	13.3025	8.6584	23.0981	3.89302	1.80752	2.09544	4.28723	4.89648	7.05648	Senescence-specific cysteine protease SAG39 OS=Oryza sativa subsp. japonica GN=SAG39 PE=2 SV=2	PREDICTED: zingipain-1-like [Malus domestica]
novel.204	1.92357	3.09552	1.83607	18.3233	5.43749	20.6257	8.15184	8.41226	3.57196	#N/A	#N/A
MD15G1365400	3.75334	4.80296	6.85662	36.236	12.6877	39.4613	35.2262	24.9121	16.7699	3-ketoacyl-CoA synthase 6 OS=Arabidopsis thaliana GN=CUT1 PE=1 SV=1	PREDICTED: 3-ketoacyl-CoA synthase 6-like [Malus domestica]
MD15G1036800	9.97868	8.86206	11.7455	26.9858	20.1474	25.5097	30.8279	20.0724	17.6098	--	PREDICTED: uncharacterized protein LOC103441769 [Malus domestica]
MD08G1084500	2.16179	0.559853	3.20486	15.6493	10.9154	17.5256	16.0206	17.3868	15.3623	Strigolactone esterase RMS3 OS=Pisum sativum GN=RMS3 PE=1 SV=1	PREDICTED: probable strigolactone esterase DAD2 [Malus domestica]
MD05G1321000	0.62089	1.20382	1.98467	23.3182	2.76104	30.9105	19.2329	34.7122	3.03838	--	PREDICTED: uncharacterized protein LOC103927051 isoform X2 [Pyrus x bretschneideri]
MD05G1178500	7.41254	10.3354	5.79969	1.33489	1.35508	2.68039	0.838382	0.71629	0.612923	--	PREDICTED: uncharacterized protein LOC103435812 [Malus domestica]
MD01G1201200	7.97852	13.3957	9.2849	2.47857	2.81011	1.17532	1.70443	2.69216	1.63176	--	PREDICTED: uncharacterized protein LOC103417841 isoform X2 [Malus domestica]
MD15G1351700	10.5378	13.558	13.6114	5.01175	5.74358	3.73458	2.33043	2.72183	4.02536	WAT1-related protein At1g21890 OS=Arabidopsis thaliana GN=At1g21890 PE=2 SV=1	PREDICTED: WAT1-related protein At1g21890-like [Malus domestica]
MD05G1358900	17.7915	5.02038	12.6986	63.9432	52.2906	57.6651	111.238	113.586	107.215	Cysteine proteinase inhibitor 1 OS=Actinidia deliciosa PE=1 SV=1	cystatin 1 [Malus prunifolia]
MD10G1236600	3.68709	3.16284	5.2327	17.2683	14.8921	9.10709	19.4013	20.9558	15.9782	Putative E3 ubiquitin-protein ligase LIN-1 OS=Lotus japonicus GN=CERBERUS PE=2 SV=2	PREDICTED: putative E3 ubiquitin-protein ligase LIN [Malus domestica]
MD10G1250800	34.0686	17.55	27.1633	7.65761	9.14907	5.0161	5.20147	12.4966	6.17221	#N/A	#N/A
MD17G1118500	19.8555	30.4096	28.4355	72.6735	54.7512	84.5054	67.9922	69.9838	44.4736	Long chain acyl-CoA synthetase 8 OS=Arabidopsis thaliana GN=LACS8 PE=1 SV=1	PREDICTED: long chain acyl-CoA synthetase 8 [Malus domestica]
MD06G1020700	174.743	283.069	398.841	797.942	1305.25	1001.17	1159.45	1109.78	1031.35	Methanol O-anthraniloyltransferase OS=Vitis labrusca GN=AMAT PE=1 SV=1	PREDICTED: methanol O-anthraniloyltransferase-like [Malus domestica]
MD11G1004600	18.9067	20.3664	35.7097	85.9596	64.31	84.4202	75.7494	114.73	106.395	Phospholipase A1-IIdelta OS=Arabidopsis thaliana GN=At2g42690 PE=1 SV=1	PREDICTED: phospholipase A1-IIdelta-like [Malus domestica]
MD00G1073200	251.872	454.177	237.001	93.1683	80.7422	113.891	43.7055	69.2704	61.8473	Protein BIC1 OS=Arabidopsis thaliana GN=BIC1 PE=1 SV=1	protein BIC1 [Prunus persica]
MD08G1168600	102.412	47.4902	65.9254	22.8752	21.5034	23.8361	16.5157	10.935	10.3641	Flavonol synthase/flavanone 3-hydroxylase OS=Malus domestica GN=FLS PE=2 SV=1	flavonol synthase [Malus domestica]
MD15G1349000	4.5852	6.30652	9.77937	24.7538	24.9521	19.8992	72.3002	34.4293	35.6196	Esterase OS=Hevea brasiliensis PE=1 SV=1	PREDICTED: esterase-like, partial [Malus domestica]
MD16G1135200	4.28368	3.86729	6.82424	14.7165	12.5039	14.4385	32.2925	44.1249	68.6008	--	PREDICTED: 5&apos;-nucleotidase domain-containing protein 4 [Malus domestica]
MD06G1232300	2.35022	2.93585	3.77114	0.216271	0.375532	0	0.160526	0	0.161366	--	hypothetical protein PRUPE_5G236600 [Prunus persica]
MD01G1009700	0.577787	1.72518	0.658384	9.46999	3.61904	11.4773	13.4902	11.6576	9.25652	--	PREDICTED: ribonuclease P protein subunit p25-like protein [Pyrus x bretschneideri]
MD08G1179500	12.1291	9.68627	13.8539	42.74	23.9674	37.3233	75.3889	61.554	54.2143	Patellin-6 OS=Arabidopsis thaliana GN=PATL6 PE=2 SV=1	PREDICTED: random slug protein 5-like [Malus domestica]
MD00G1110200	4.09839	2.28607	4.07991	14.6892	9.80285	21.2038	15.2239	14.4159	3.93953	BON1-associated protein 2 OS=Arabidopsis thaliana GN=BAP2 PE=1 SV=1	PREDICTED: BON1-associated protein 2-like [Malus domestica]
MD05G1116600	113.769	163.54	164.126	297.865	335.315	383.165	553.224	476.047	509.968	#N/A	Cyclophilin-type peptidyl-prolyl cis-trans isomerase domain
MD13G1080200	129.703	141.652	118.564	41.5046	29.5769	59.6511	35.3043	39.6475	30.2864	#N/A	#N/A
MD17G1010400	14.87	22.8978	19.178	110.505	38.9412	105.624	86.0569	97.7899	35.8446	Glycerophosphodiester phosphodiesterase GDPD1, chloroplastic OS=Arabidopsis thaliana GN=GDPD1 PE=1 SV=1	PREDICTED: glycerophosphodiester phosphodiesterase GDPD1, chloroplastic-like [Pyrus x bretschneideri]
MD02G1244000	6.70601	2.89547	6.41614	24.1433	17.7813	17.6244	48.2118	28.3024	27.4682	Pyruvate kinase 1, cytosolic OS=Oryza sativa subsp. japonica GN=Os11g0148500 PE=1 SV=1	PREDICTED: pyruvate kinase 1, cytosolic-like [Malus domestica]
MD10G1062200	3.34108	3.75719	3.67117	9.55433	7.16828	8.52444	22.8723	7.66697	7.15307	Polyprenol reductase 2 OS=Arabidopsis thaliana GN=At2g16530 PE=1 SV=2	PREDICTED: polyprenol reductase 2-like [Malus domestica]
MD12G1176700	21.1337	11.0031	15.7594	4.31534	5.35335	2.40796	2.79853	4.40857	5.12843	Lectin-domain containing receptor kinase VI.3 OS=Arabidopsis thaliana GN=LECRK63 PE=2 SV=1	PREDICTED: lectin-domain containing receptor kinase VI.3-like [Malus domestica]
MD01G1092200	7.42785	5.02803	5.59884	1.73358	0.722442	1.2777	0.617633	2.04867	2.17303	Protein NTM1-like 9 OS=Arabidopsis thaliana GN=NTL9 PE=1 SV=1	PREDICTED: NAC domain-containing protein 91-like [Malus domestica]
MD10G1314500	26.1686	5.18026	20.5226	2.77322	0.646845	1.47767	2.48852	3.26097	2.87213	Gibberellin 2-beta-dioxygenase 8 OS=Arabidopsis thaliana GN=GA2OX8 PE=1 SV=2	PREDICTED: gibberellin 2-beta-dioxygenase 8-like [Malus domestica]
MD11G1297800	3.81754	5.24874	5.39384	13.3061	10.2147	15.9467	17.5081	16.6933	25.2595	Secoisolariciresinol dehydrogenase (Fragment) OS=Forsythia intermedia PE=1 SV=1	PREDICTED: secoisolariciresinol dehydrogenase [Malus domestica]
MD09G1069300	45.8942	29.5785	46.6741	12.2764	17.0764	8.84561	8.95816	14.6221	21.7049	Receptor-like protein kinase FERONIA OS=Arabidopsis thaliana GN=FER PE=1 SV=1	PREDICTED: receptor-like protein kinase FERONIA [Malus domestica]
MD15G1348900	5.38966	5.39371	7.59249	24.4804	15.952	16.6077	78.5953	40.9841	34.6712	Alpha-L-fucosidase 3 OS=Arabidopsis thaliana GN=FXG1 PE=2 SV=1	PREDICTED: alpha-L-fucosidase 3-like [Malus domestica]
MD14G1107200	9.07775	0.941866	2.96542	0.10536	0.384187	0.0606669	0.791801	0.0324244	0.678026	Cytochrome P450 86A22 OS=Petunia hybrida GN=CYP86A22 PE=1 SV=1	PREDICTED: cytochrome P450 86A22-like [Malus domestica]
MD01G1092100	6.77242	6.96269	7.71712	2.53545	2.09769	1.37406	1.41144	1.56057	2.7542	#N/A	#N/A
MD03G1033000	6.73811	7.61085	6.50763	16.1329	13.0354	14.1483	13.2824	20.576	12.194	Mediator of RNA polymerase II transcription subunit 15a OS=Arabidopsis thaliana GN=MED15A PE=1 SV=1	PREDICTED: mediator of RNA polymerase II transcription subunit 15a-like [Malus domestica]
MD15G1024100	91.9775	64.2446	147.068	485.194	256.606	473.049	686.191	570.816	526.664	Bifunctional dihydroflavonol 4-reductase/flavanone 4-reductase OS=Malus domestica GN=DFR PE=1 SV=1	bifunctional dihydroflavonol 4-reductase/flavanone 4-reductase [Malus domestica]
MD08G1084400	109.718	135.606	123.354	20.2394	50.0169	20.0155	21.3047	49.3415	57.849	U-box domain-containing protein 4 OS=Arabidopsis thaliana GN=PUB4 PE=1 SV=3	PREDICTED: U-box domain-containing protein 4-like [Malus domestica]
MD15G1269800	27.7488	25.4854	30.3755	11.969	15.7243	12.2881	12.5442	14.1289	14.2205	#N/A	Zinc finger, C3HC4 RING-type
MD15G1432400	139.049	96.6312	133.522	47.8597	56.9452	34.8724	25.1985	57.5387	40.4484	TMV resistance protein N OS=Nicotiana glutinosa GN=N PE=1 SV=1	PREDICTED: TMV resistance protein N isoform X2 [Pyrus x bretschneideri]
MD14G1212000	2.51631	2.4053	2.07276	5.22069	4.55746	4.67785	6.2184	4.51951	4.51699	--	PREDICTED: uncharacterized protein LOC103930651 [Pyrus x bretschneideri]
MD12G1240300	5.01062	5.57696	16.0964	59.8115	32.5055	65.9373	32.7907	55.9142	32.6989	Probable aldo-keto reductase 1 OS=Glycine max GN=AKR1 PE=2 SV=1	PREDICTED: probable aldo-keto reductase 1 [Malus domestica]
MD00G1046700	9.68998	4.86179	6.67266	2.49973	1.37233	1.89617	1.84985	4.9382	2.07731	Probable LRR receptor-like serine/threonine-protein kinase At1g56130 OS=Arabidopsis thaliana GN=At1g56130 PE=2 SV=2	PREDICTED: probable LRR receptor-like serine/threonine-protein kinase At1g56130 [Pyrus x bretschneideri]
MD10G1242600	32.019	56.5477	41.8544	16.059	17.1617	12.3027	8.44098	12.6418	11.8792	Protein LIGHT-DEPENDENT SHORT HYPOCOTYLS 3 OS=Arabidopsis thaliana GN=LSH3 PE=1 SV=1	PREDICTED: protein G1-like1 [Pyrus x bretschneideri]
MD12G1239000	3.53092	7.5016	9.05278	36.4204	18.2581	48.7928	16.1353	19.8502	16.4808	Probable aldo-keto reductase 1 OS=Glycine max GN=AKR1 PE=2 SV=1	PREDICTED: perakine reductase-like [Malus domestica]
MD09G1043900	11.455	2.5744	6.7971	1.11078	0.330643	0.426397	1.35448	1.30226	1.24317	AAA-ATPase At3g28580 OS=Arabidopsis thaliana GN=At3g28580 PE=2 SV=1	PREDICTED: AAA-ATPase At3g28510-like [Malus domestica]
MD15G1093800	2.06786	3.07293	2.21514	8.47906	7.28192	15.5046	8.80244	7.12305	8.46377	Dehydration-responsive element-binding protein 3 OS=Arabidopsis thaliana GN=DREB3 PE=2 SV=1	dehydration-responsive element-binding protein 3-like [Malus domestica]
MD11G1313800	30.8707	19.3135	22.4125	10.771	9.55129	10.5283	11.5838	8.75544	11.3772	ABC transporter C family member 4 OS=Arabidopsis thaliana GN=ABCC4 PE=2 SV=2	PREDICTED: ABC transporter C family member 14-like [Pyrus x bretschneideri]
MD15G1047400	5.69526	7.16966	4.70842	1.86866	2.13771	2.59503	1.55018	1.57865	1.39426	--	PREDICTED: uncharacterized protein LOC103455761 [Malus domestica]
MD14G1056700	1.50593	1.33938	2.40969	30.0508	3.32577	21.4551	55.8851	27.2363	8.16176	Actin OS=Gossypium hirsutum PE=3 SV=1	hypothetical protein AMTR_s00044p00088410 [Amborella trichopoda]
MD07G1181200	5.39799	1.02936	4.77604	0.16363	0.227301	0.314064	1.57889	0.604284	0.610442	#N/A	#N/A
MD11G1307000	22.1063	24.2407	22.604	63.4794	39.8604	65.9777	95.5114	100.754	72.5657	Sucrose synthase 3 OS=Arabidopsis thaliana GN=SUS3 PE=1 SV=1	sucrose synthase 3 [Malus domestica]
MD03G1107900	5.25985	5.79594	6.56438	15.3931	11.0691	12.7894	21.5623	16.8892	13.6465	Ethylene-responsive transcription factor RAP2-7 OS=Arabidopsis thaliana GN=RAP2-7 PE=2 SV=2	PREDICTED: ethylene-responsive transcription factor RAP2-7-like isoform X1 [Malus domestica]
MD07G1293300	1.43145	1.38185	1.61887	3.62359	4.95494	3.98669	6.55587	4.18185	5.61251	--	PREDICTED: uncharacterized protein LOC103439891 isoform X2 [Malus domestica]
MD01G1095200	59.935	53.6254	66.7616	28.4655	23.0485	15.3097	14.3774	20.0502	20.1031	Uncharacterized calcium-binding protein At1g02270 OS=Arabidopsis thaliana GN=At1g02270 PE=2 SV=2	PREDICTED: uncharacterized calcium-binding protein At1g02270-like [Pyrus x bretschneideri]
MD15G1096800	5.17868	8.8713	7.817	22.4769	16.0204	28.1035	19.6493	14.4494	15.6526	Tetraspanin-19 OS=Arabidopsis thaliana GN=TOM2AH3 PE=2 SV=1	tetraspanin-19-like isoform X2 [Prunus avium]
MD02G1026100	8.46595	7.01679	10.3191	18.1779	17.3679	20.0489	29.2555	28.1259	26.299	TMV resistance protein N OS=Nicotiana glutinosa GN=N PE=1 SV=1	PREDICTED: TMV resistance protein N-like [Pyrus x bretschneideri]
MD01G1229900	23.379	9.6374	15.4127	2.65407	5.07692	1.92908	2.73696	4.1509	6.20864	NAC domain-containing protein 91 OS=Arabidopsis thaliana GN=NAC091 PE=1 SV=1	PREDICTED: NAC domain-containing protein 91-like [Malus domestica]
MD10G1236500	6.7972	3.43283	5.41733	23.8654	19.9981	12.8007	19.9152	24.2615	17.0923	Putative E3 ubiquitin-protein ligase LIN OS=Medicago truncatula GN=LIN PE=2 SV=1	PREDICTED: putative E3 ubiquitin-protein ligase LIN [Malus domestica]
MD15G1180200	15.3409	11.8429	9.33402	3.71515	5.13078	3.48244	6.06019	5.84964	4.54475	GDP-fucose transporter 1 OS=Arabidopsis thaliana GN=GFT1 PE=1 SV=1	PREDICTED: GDP-mannose transporter GONST4 [Malus domestica]
MD17G1044300	32.9616	39.5997	40.0698	15.6727	20.6389	13.7503	7.03485	16.4143	19.3023	--	PREDICTED: uncharacterized protein LOC103404389 [Malus domestica]
MD15G1059800	17.0606	13.0092	14.295	7.10061	5.82926	7.45481	3.1287	5.31246	5.25115	Zinc transporter 4, chloroplastic OS=Arabidopsis thaliana GN=ZIP4 PE=2 SV=1	PREDICTED: zinc transporter 4, chloroplastic isoform X1 [Pyrus x bretschneideri]
MD04G1028600	5.53989	3.40174	4.22166	11.0585	11.0309	9.99547	13.36	15.5762	19.3988	Histone-lysine N-methyltransferase ATX2 OS=Arabidopsis thaliana GN=ATX2 PE=2 SV=1	PREDICTED: histone-lysine N-methyltransferase ATX2 isoform X1 [Malus domestica]
MD10G1179200	5.64122	8.64976	7.99932	17.7063	15.2608	18.1108	21.7924	24.9272	24.0503	Protein NPGR2 OS=Arabidopsis thaliana GN=NPGR2 PE=1 SV=1	PREDICTED: tetratricopeptide repeat protein 7A [Malus domestica]
MD07G1195500	23.9154	17.0682	39.8231	116.779	78.4998	86.8291	186.241	168.299	129.184	Ubiquitin-conjugating enzyme E2 7 OS=Arabidopsis thaliana GN=UBC7 PE=1 SV=1	PREDICTED: ubiquitin-conjugating enzyme E2 7-like [Malus domestica]
MD13G1118500	33.264	107.619	58.8783	11.6736	15.6579	17.4983	13.0232	20.6534	15.9212	Cytochrome P450 78A5 OS=Arabidopsis thaliana GN=CYP78A5 PE=2 SV=1	PREDICTED: cytochrome P450 78A5-like [Malus domestica]
MD03G1170700	4.84408	3.92701	4.52214	54.6144	7.23216	50.03	124.171	100.676	31.4109	Hexokinase-4 OS=Arabidopsis thaliana GN=At3g20040 PE=1 SV=2	PREDICTED: hexokinase-3 [Malus domestica]
MD10G1158100	90.0057	147.055	191.457	411.595	397.238	416.59	502.482	531.579	538.719	Cytochrome P450 82G1 OS=Arabidopsis thaliana GN=CYP82G1 PE=1 SV=1	PREDICTED: cytochrome P450 82G1-like [Malus domestica]
MD02G1013600	25.8555	9.9799	21.4293	68.7985	74.2552	59.4956	63.4347	83.1014	72.6481	110 kDa U5 small nuclear ribonucleoprotein component CLO OS=Arabidopsis thaliana GN=CLO PE=1 SV=1	PREDICTED: LOW QUALITY PROTEIN: 116 kDa U5 small nuclear ribonucleoprotein component-like [Malus domestica]
MD13G1087200	15.0147	13.1911	11.8102	6.29599	6.60158	4.54617	5.22913	5.45765	8.90431	Cyclin-D1-1 OS=Arabidopsis thaliana GN=CYCD1-1 PE=1 SV=3	PREDICTED: cyclin-D1-1-like [Malus domestica]
MD02G1165700	100.925	76.6235	105.185	48.8375	35.7416	33.5415	37.7031	36.3203	43.9106	Probable disease resistance protein At5g66900 OS=Arabidopsis thaliana GN=At5g66900 PE=3 SV=1	PREDICTED: probable disease resistance protein At5g66900 [Malus domestica]
MD11G1291700	10.9358	28.1101	14.9163	90.3233	47.8825	120.655	104.983	99.777	74.5456	--	PREDICTED: uncharacterized protein LOC103449078 [Malus domestica]
MD13G1222900	1.10824	1.12134	1.35933	5.33472	2.65212	4.4101	7.22105	7.00303	2.40309	3-isopropylmalate dehydratase large subunit, chloroplastic OS=Arabidopsis thaliana GN=IIL1 PE=1 SV=1	PREDICTED: 3-isopropylmalate dehydratase large subunit-like [Pyrus x bretschneideri]
MD16G1184100	3.56571	4.82253	5.09657	1.19511	1.01166	0.860195	0.33265	1.01144	1.83915	--	PREDICTED: uncharacterized protein LOC103403842 [Malus domestica]
MD16G1098200	73.1618	47.9185	113.355	357.799	200.355	302.836	183.331	303.645	152.548	--	PREDICTED: lipase-like [Malus domestica]
MD04G1113100	7.16436	10.6719	8.20648	20.4894	17.8728	27.2503	26.4169	24.9448	22.1744	WRKY transcription factor 44 OS=Arabidopsis thaliana GN=WRKY44 PE=1 SV=2	PREDICTED: WRKY transcription factor 44-like [Malus domestica]
MD08G1178000	11.9651	14.1306	18.8321	44.7647	32.2097	33.4006	68.842	48.8259	53.7239	Acetyl-CoA carboxylase 1 OS=Arabidopsis thaliana GN=ACC1 PE=1 SV=1	PREDICTED: acetyl-CoA carboxylase 1-like [Pyrus x bretschneideri]
MD04G1238100	12.4236	13.9455	14.8165	1.90942	5.14878	2.84565	1.25052	4.14793	3.39406	Probable receptor-like protein kinase At5g61350 OS=Arabidopsis thaliana GN=At5g61350 PE=2 SV=1	PREDICTED: receptor-like protein kinase FERONIA [Pyrus x bretschneideri]
MD10G1198000	60.8547	51.4843	75.4064	28.9525	24.8258	16.8896	8.05868	23.1263	14.4116	Probable LRR receptor-like serine/threonine-protein kinase At1g56130 OS=Arabidopsis thaliana GN=At1g56130 PE=2 SV=2	PREDICTED: putative serine/threonine-protein kinase isoform X1 [Malus domestica]
MD15G1345700	10.8397	10.3775	9.20497	5.45662	4.14917	4.82463	4.578	4.80702	4.86244	Aldehyde dehydrogenase family 3 member H1 OS=Arabidopsis thaliana GN=ALDH3H1 PE=1 SV=2	PREDICTED: aldehyde dehydrogenase family 3 member H1-like [Malus domestica]
MD10G1115100	3.73354	2.6323	8.33288	25.9578	15.8204	28.4742	46.4266	32.6554	26.9458	Receptor-like protein kinase HAIKU2 OS=Arabidopsis thaliana GN=IKU2 PE=1 SV=1	PREDICTED: receptor-like protein kinase HAIKU2 [Malus domestica]
MD10G1239000	1.00644	0.429296	1.14683	3.90781	2.68293	4.60399	7.89964	6.25145	5.44178	--	PREDICTED: uncharacterized protein LOC103446067 [Malus domestica]
MD16G1287800	20.1731	14.6995	14.54	5.46125	8.14414	5.05608	3.48131	7.56645	9.15629	Protein NUCLEAR FUSION DEFECTIVE 4 OS=Arabidopsis thaliana GN=NFD4 PE=3 SV=1	PREDICTED: protein NUCLEAR FUSION DEFECTIVE 4-like [Pyrus x bretschneideri]
MD14G1215300	2.38245	2.79465	3.11007	10.0343	5.32957	9.51647	8.91561	6.0066	3.21496	Squamosa promoter-binding-like protein 6 OS=Arabidopsis thaliana GN=SPL6 PE=2 SV=2	PREDICTED: squamosa promoter-binding-like protein 6 isoform X1 [Pyrus x bretschneideri]
MD09G1051600	18.0882	16.9915	12.5852	5.48103	7.81989	5.91	7.42392	5.75871	10.2369	Amino acid transporter ANT1 OS=Arabidopsis thaliana GN=ANT1 PE=1 SV=1	PREDICTED: vacuolar amino acid transporter 1-like [Malus domestica]
MD15G1107300	654.537	392.264	634.145	148.235	236.254	109.724	96.7564	249.34	241.637	--	PREDICTED: uncharacterized protein LOC103456091 [Malus domestica]
MD13G1123300	2.92502	3.43109	6.32597	0.89722	1.02823	0.619952	0.89904	0.883582	0.451872	BAG family molecular chaperone regulator 5, mitochondrial OS=Arabidopsis thaliana GN=BAG5 PE=1 SV=1	PREDICTED: uncharacterized protein LOC103452428 isoform X1 [Malus domestica]
MD13G1213900	1.78712	0.323399	2.85627	0	0	0	0.0517852	0.400797	0.0520561	Transcription factor MYB15 OS=Arabidopsis thaliana GN=MYB15 PE=1 SV=1	PREDICTED: myb-related protein Myb4-like [Malus domestica]
MD16G1102900	31.1821	22.8851	35.7184	6.20305	11.8993	4.76235	5.59078	13.3326	15.4275	Cyclin-dependent protein kinase inhibitor SMR6 OS=Arabidopsis thaliana GN=SMR6 PE=1 SV=1	PREDICTED: uncharacterized protein LOC103403074 [Malus domestica]
MD08G1107900	6.97428	2.89761	6.98877	1.65309	1.29675	0.940662	1.97041	2.44194	2.19837	Wall-associated receptor kinase 2 OS=Arabidopsis thaliana GN=WAK2 PE=1 SV=1	PREDICTED: wall-associated receptor kinase 2-like [Malus domestica]
MD13G1108500	49.464	229.341	81.6288	414.05	1130.9	1104.86	438.277	267.059	447.343	25.3 kDa heat shock protein, chloroplastic OS=Arabidopsis thaliana GN=HSP25.3 PE=2 SV=1	PREDICTED: small heat shock protein, chloroplastic-like [Malus domestica]
MD06G1052700	35.4511	7.08403	33.1177	4.43461	1.04787	2.63246	7.32966	4.9525	4.55384	Putative RING-H2 finger protein ATL21A OS=Arabidopsis thaliana GN=ATL21A PE=3 SV=1	PREDICTED: RING-H2 finger protein ATL22-like [Malus domestica]
MD06G1098900	2.51162	2.20516	2.4429	1.15947	0.674222	0.641756	1.01072	0.608543	1.34797	ABC transporter C family member 10 OS=Arabidopsis thaliana GN=ABCC10 PE=2 SV=2	PREDICTED: ABC transporter C family member 10-like [Malus domestica]
MD07G1003900	23.7311	13.0334	9.26762	4.64275	4.03082	2.44581	9.91655	4.23575	5.60149	Linoleate 13S-lipoxygenase 2-1, chloroplastic OS=Solanum tuberosum GN=LOX2.1 PE=1 SV=1	PREDICTED: linoleate 13S-lipoxygenase 2-1, chloroplastic-like [Pyrus x bretschneideri]
MD05G1203100	4.78651	5.74039	7.55457	23.4744	12.1662	29.1262	18.2086	20.3892	14.6031	Cytochrome P450 94A1 OS=Vicia sativa GN=CYP94A1 PE=2 SV=2	PREDICTED: cytochrome P450 94A1-like [Malus domestica]
MD11G1167900	102.187	59.6915	54.5553	17.5188	24.0531	8.23771	8.67943	19.1402	27.1812	NAC domain-containing protein 90 OS=Arabidopsis thaliana GN=NAC090 PE=2 SV=1	PREDICTED: NAC domain-containing protein 90-like [Malus domestica]
MD13G1051300	2.98219	1.93352	9.20424	27.0475	26.578	33.1541	78.4783	84.6261	72.9264	E3 ubiquitin-protein ligase RHA2B OS=Arabidopsis thaliana GN=RHA2B PE=1 SV=2	PREDICTED: E3 ubiquitin-protein ligase RNF181-like [Pyrus x bretschneideri]
MD03G1227300	34.283	41.8409	36.2863	114.534	84.7675	249.473	51.7833	392.349	169.21	Metallothionein-like protein type 3 OS=Malus domestica GN=MT2 PE=3 SV=1	RecName: Full=Metallothionein-like protein type 3; Short=MT-3 [Malus domestica]
MD02G1091300	3.94455	5.50333	4.85597	9.81067	10.2579	10.8104	10.4514	12.4679	12.0859	--	PREDICTED: uncharacterized protein LOC103445342 [Malus domestica]
MD01G1198000	12.8523	9.50889	11.331	27.1892	21.4401	35.6614	29.8002	34.3518	29.6646	RHOMBOID-like protein 2 OS=Arabidopsis thaliana GN=RBL2 PE=1 SV=1	PREDICTED: RHOMBOID-like protein 2 [Malus domestica]
MD06G1008700	79.3005	90.7946	81.165	162.419	299.867	185.948	138.563	240.115	289.231	Catalase isozyme 1 OS=Gossypium hirsutum GN=CAT1 PE=2 SV=2	catalase [Eriobotrya japonica]
MD12G1189700	5.76029	1.3522	2.37883	0.431648	0.172964	0.0382379	0.443614	0.858348	0.557418	Probable WRKY transcription factor 70 OS=Arabidopsis thaliana GN=WRKY70 PE=2 SV=1	PREDICTED: probable WRKY transcription factor 70 isoform X1 [Malus domestica]
MD11G1070800	2.42685	2.70295	1.99722	4.63189	20.2276	12.8242	18.823	9.88322	14.2775	Asparagine synthetase [glutamine-hydrolyzing] 1 OS=Lotus japonicus GN=AS1 PE=2 SV=2	PREDICTED: asparagine synthetase [glutamine-hydrolyzing] 1 [Malus domestica]
MD14G1017100	3.31479	2.20634	6.68863	21.7747	12.1251	22.482	24.069	30.8099	21.7789	UPF0481 protein At3g47200 OS=Arabidopsis thaliana GN=At3g47200 PE=2 SV=1	PREDICTED: UPF0481 protein At3g47200-like [Malus domestica]
MD00G1157300	33.3476	50.087	69.6864	139.092	147.81	131.619	102.949	177.493	201.056	Gamma-glutamylcyclotransferase 2-3 OS=Arabidopsis thaliana GN=GGCT2;3 PE=1 SV=1	PREDICTED: putative glutathione-specific gamma-glutamylcyclotransferase 2 isoform X2 [Malus domestica]γ-谷氨酰转移酶（GGT）是将谷胱甘肽上γ-谷氨酰基转移至另一个肽或氨基酸上的酶。
MD12G1240000	0.549066	1.47729	1.93885	9.28644	4.04383	11.2375	4.28107	6.51959	6.33341	Probable aldo-keto reductase 1 OS=Glycine max GN=AKR1 PE=2 SV=1	PREDICTED: probable aldo-keto reductase 1 [Pyrus x bretschneideri]
MD16G1132300	7.72074	14.3531	8.49888	29.786	24.3487	41.8639	36.289	26.669	17.5263	--	PREDICTED: calponin homology domain-containing protein DDB_G0272472-like [Pyrus x bretschneideri]
MD05G1187100	52.6354	86.0204	68.0962	232.735	132.4	261.762	155.749	199.413	112.694	Pleiotropic drug resistance protein 1 OS=Nicotiana tabacum GN=PDR1 PE=2 SV=1	PREDICTED: pleiotropic drug resistance protein 1-like [Malus domestica]
MD13G1228900	2.01334	1.60677	1.83958	5.55016	4.09706	8.57574	10.5266	12.8062	10.0823	Probable leucine-rich repeat receptor-like protein kinase At5g63930 OS=Arabidopsis thaliana GN=At5g63930 PE=2 SV=1	PREDICTED: probable leucine-rich repeat receptor-like protein kinase At2g33170 [Malus domestica]
MD11G1070500	169.616	118.439	138.831	48.091	66.0873	31.4798	16.4824	70.4657	48.7687	Probable protein phosphatase 2C 25 OS=Arabidopsis thaliana GN=At2g30020 PE=1 SV=1	PREDICTED: probable protein phosphatase 2C 25 [Pyrus x bretschneideri]
MD13G1134600	1.10958	0.315527	0.939235	10.6099	2.7138	5.23127	14.2176	8.52469	5.93723	Probable xyloglucan endotransglucosylase/hydrolase protein B OS=Phaseolus angularis GN=XTHB PE=2 SV=1	xyloglucan endotransglucosylase/hydrolase protein A-like precursor [Malus domestica]
MD03G1230300	0.98949	2.9989	1.70399	7.38023	6.5007	9.32335	4.38234	12.609	4.20503	Protein DETOXIFICATION 19 OS=Arabidopsis thaliana GN=DTX19 PE=2 SV=1	PREDICTED: protein DETOXIFICATION 19-like [Pyrus x bretschneideri]
MD05G1362600	3.70953	1.84601	3.72377	14.8238	8.11384	11.16	25.1259	17.5399	12.8763	C2 and GRAM domain-containing protein At1g03370 OS=Arabidopsis thaliana GN=At1g03370 PE=2 SV=4	PREDICTED: C2 and GRAM domain-containing protein At1g03370-like [Malus domestica]
MD11G1037400	268.144	270.655	290.619	159.128	98.3432	111.5	95.3066	124.379	153.276	Heat shock cognate protein 80 OS=Solanum lycopersicum GN=HSC80 PE=2 SV=1	PREDICTED: heat shock protein 90-2 [Pyrus x bretschneideri]
MD16G1028800	2.14511	5.53355	4.19029	0.701856	0.776921	0.909302	0.195355	0.863985	0.392755	#N/A	#N/A
MD03G1269700	10.9825	8.78986	12.3126	54.1355	20.6053	38.3112	59.0022	40.7336	30.2514	BTB/POZ and MATH domain-containing protein 2 OS=Arabidopsis thaliana GN=BPM2 PE=1 SV=1	PREDICTED: BTB/POZ and MATH domain-containing protein 2-like [Malus domestica]
MD01G1017100	5.52383	6.19077	3.86125	1.48839	1.59912	1.87475	0.414281	0.801593	1.14523	Transcription factor MYB113 OS=Arabidopsis thaliana GN=MYB113 PE=1 SV=1	PREDICTED: transcription factor MYB90-like isoform X1 [Malus domestica]
MD11G1071500	1.59098	0.538761	0.901511	0.198187	0.195611	0.120124	0.336788	0.269649	0.420269	Increased DNA methylation 1 OS=Arabidopsis thaliana GN=IDM1 PE=1 SV=1	PREDICTED: uncharacterized protein LOC103429947 [Malus domestica]
MD12G1213300	12.515	3.59374	5.5525	1.29969	1.50045	0.647239	0.821285	1.21075	3.53821	--	PREDICTED: ankyrin repeat-containing protein At3g12360-like [Malus domestica]
MD01G1196800	3.15261	5.48656	7.14369	35.6602	12.0737	25.5693	45.732	33.9982	21.6977	Protein DETOXIFICATION 49 OS=Arabidopsis thaliana GN=DTX49 PE=2 SV=1	PREDICTED: protein DETOXIFICATION 49-like isoform X1 [Malus domestica]
MD01G1072900	66.967	72.8177	83.1623	42.3262	28.6704	28.745	23.1024	41.415	37.2024	Delta(8)-fatty-acid desaturase OS=Borago officinalis GN=sld1 PE=1 SV=1	PREDICTED: LOW QUALITY PROTEIN: delta(8)-fatty-acid desaturase 1-like [Malus domestica]
MD17G1185300	1.51325	1.88065	1.53275	0.46532	0.568372	0.665218	0.589529	0.276528	0.592613	#N/A	#N/A
MD10G1078900	1.32567	3.5005	1.41811	0.216873	0.423649	0.218535	0.422552	0.100114	0.121361	Polyol transporter 5 OS=Arabidopsis thaliana GN=PLT5 PE=1 SV=2	PREDICTED: putative polyol transporter 1 [Malus domestica]
MD14G1227500	0.92594	0.513448	1.67309	5.76566	5.17834	3.75493	5.9323	5.09064	2.67015	Transcription factor MYB62 OS=Arabidopsis thaliana GN=MYB62 PE=2 SV=1	PREDICTED: transcription factor MYB108-like [Malus domestica]
MD11G1054100	1057.52	161.129	854.474	136.53	44.6505	63.1373	82.6658	332.28	131.485	Non-specific lipid-transfer protein OS=Prunus avium PE=1 SV=1	PREDICTED: non-specific lipid-transfer protein 1-like [Malus domestica]
MD07G1229200	2.53101	0.719736	3.81491	12.694	13.4208	12.5788	16.2545	20.0532	28.2037	--	PREDICTED: probable sodium-coupled neutral amino acid transporter 6 [Malus domestica]
MD13G1036200	107.04	58.2587	99.0539	37.7925	20.7375	20.661	23.8751	38.6164	34.099	--	PREDICTED: LEAF RUST 10 DISEASE-RESISTANCE LOCUS RECEPTOR-LIKE PROTEIN KINASE-like 1.1 [Malus domestica]
novel.113	7.92268	7.87909	8.08016	13.7219	22.1686	19.5257	23.1464	13.4671	36.1846	#N/A	#N/A
MD03G1186000	3.70953	5.86036	6.64239	21.948	11.8019	20.5875	17.8016	20.1183	10.301	Receptor-like serine/threonine-protein kinase SD1-7 OS=Arabidopsis thaliana GN=SD17 PE=1 SV=1	PREDICTED: G-type lectin S-receptor-like serine/threonine-protein kinase At4g27290 [Malus domestica]
MD12G1010100	165.865	135.891	164.462	78.181	82.7164	55.2726	44.3005	88.8027	65.1151	TMV resistance protein N OS=Nicotiana glutinosa GN=N PE=1 SV=1	PREDICTED: TMV resistance protein N-like [Malus domestica]
MD07G1224100	2.13951	1.89971	1.7485	0.525018	0.195351	0.388684	0.0417526	0.461641	0.209855	Transcription factor bHLH51 OS=Arabidopsis thaliana GN=BHLH51 PE=2 SV=1	PREDICTED: transcription factor bHLH51 [Malus domestica]
MD05G1243000	0.470371	0.321019	0.153138	1.50822	1.43103	2.57432	1.10947	2.15501	0.813851	--	PREDICTED: probable GMP synthase [glutamine-hydrolyzing] [Malus domestica]
MD12G1216800	6.76405	6.98982	7.1799	1.40304	3.26606	2.07019	1.14716	2.45577	3.01785	Protein indeterminate-domain 2 OS=Arabidopsis thaliana GN=IDD2 PE=2 SV=1	zinc finger protein [Malus domestica]
MD13G1174100	4.76967	4.86783	7.63091	22.5183	11.8611	18.4364	43.3708	36.0113	39.4911	Tubby-like F-box protein 3 OS=Arabidopsis thaliana GN=TULP3 PE=1 SV=1	PREDICTED: tubby-like F-box protein 3 [Malus domestica]
MD11G1031400	68.2736	56.3028	37.3326	17.547	23.511	13.1988	17.2117	28.9828	24.2622	F-box protein CPR30 OS=Arabidopsis thaliana GN=CPR30 PE=1 SV=2	PREDICTED: uncharacterized protein LOC103447537 [Malus domestica]
MD04G1154100	246.685	107.065	198.955	66.3382	45.7609	29.1349	97.8053	62.8952	104.22	DnaJ protein homolog 2 OS=Allium porrum GN=LDJ2 PE=2 SV=1	PREDICTED: dnaJ homolog subfamily B member 4-like [Malus domestica]
MD03G1186100	2.78039	2.88355	4.44618	14.2578	6.9759	11.8091	10.9998	10.5481	6.34093	G-type lectin S-receptor-like serine/threonine-protein kinase At4g27290 OS=Arabidopsis thaliana GN=At4g27290 PE=3 SV=4	PREDICTED: G-type lectin S-receptor-like serine/threonine-protein kinase At4g27290 [Malus domestica]
MD03G1242400	2.92242	0.341522	2.18964	0.0687665	0.0358218	0	0.0765622	0.423258	0	Epidermis-specific secreted glycoprotein EP1 OS=Daucus carota GN=EP1 PE=1 SV=1	PREDICTED: epidermis-specific secreted glycoprotein EP1-like [Malus domestica]
MD11G1102300	38.8092	10.392	27.8508	6.8963	4.06833	5.43035	3.39608	5.35119	4.23845	Probable LRR receptor-like serine/threonine-protein kinase At3g47570 OS=Arabidopsis thaliana GN=At3g47570 PE=2 SV=1	PREDICTED: probable LRR receptor-like serine/threonine-protein kinase At3g47570 [Malus domestica]
MD12G1206600	113.397	59.9613	87.2534	209.023	206.565	226.607	288.484	309.037	334.904	Pyrophosphate-energized vacuolar membrane proton pump 1 OS=Arabidopsis thaliana GN=AVP1 PE=1 SV=1	PREDICTED: pyrophosphate-energized vacuolar membrane proton pump 1 [Malus domestica]
MD17G1132800	47.0602	34.558	69.0048	134.715	117.375	153.289	200.61	212.444	223.067	Reticulon-like protein B8 OS=Arabidopsis thaliana GN=RTNLB8 PE=2 SV=1	PREDICTED: reticulon-like protein B8 [Malus domestica]
MD09G1069400	1.34861	1.23766	0.598729	0.0526493	0.219408	0.141474	0.0390786	0.194434	0.137491	Receptor-like protein kinase FERONIA OS=Arabidopsis thaliana GN=FER PE=1 SV=1	PREDICTED: receptor-like protein kinase FERONIA [Malus domestica]
MD02G1287500	13.5054	15.9965	13.1484	26.584	42.1408	28.5793	29.1543	29.7374	36.4664	--	PREDICTED: LOW QUALITY PROTEIN: beta-galactosidase [Malus domestica]
MD05G1068600	0.214181	0.052205	0.0298845	1.10372	1.97125	0.756584	2.04807	1.06753	1.8235	Polyol transporter 5 OS=Arabidopsis thaliana GN=PLT5 PE=1 SV=2	PREDICTED: putative polyol transporter 1 [Malus domestica]
MD09G1046400	1.25565	1.49265	1.54808	2.88174	3.27859	3.42046	3.9564	2.82923	3.38351	--	PREDICTED: uncharacterized protein LOC103421957 [Malus domestica]
MD02G1317700	1.11956	0.293876	1.26171	4.43795	5.77953	4.7701	7.82335	7.83048	8.60932	#N/A	#N/A
MD04G1125600	395.992	262.575	453.859	143.943	46.6862	55.6893	89.85	134.098	76.8466	Probable mediator of RNA polymerase II transcription subunit 37e OS=Arabidopsis thaliana GN=MED37E PE=1 SV=3	PREDICTED: probable mediator of RNA polymerase II transcription subunit 37c isoform X2 [Gossypium raimondii]
MD04G1224700	47.1158	38.4715	46.1656	24.0002	19.6096	14.8481	13.5767	16.3816	13.5318	Transcription factor UNE12 OS=Arabidopsis thaliana GN=UNE12 PE=2 SV=2	PREDICTED: transcription factor UNE12-like isoform X2 [Malus domestica]
MD05G1123700	10.9803	11.3121	15.8456	74.6621	22.2342	74.6706	56.1319	53.1851	36.1927	Zeaxanthin epoxidase, chloroplastic OS=Oncidium hybrid cultivar GN=ZEP PE=2 SV=1	PREDICTED: uncharacterized protein LOC103946619 [Pyrus x bretschneideri]
MD04G1170900	2.21011	1.44775	2.69829	11.0502	5.3325	6.94835	10.9821	10.682	9.7497	Cationic peroxidase 1 OS=Arachis hypogaea GN=PNC1 PE=1 SV=2	PREDICTED: cationic peroxidase 1-like [Malus domestica]
MD09G1247300	15.6627	10.407	14.4056	37.2183	27.3488	28.1035	58.362	24.085	23.306	Two pore calcium channel protein 1 OS=Arabidopsis thaliana GN=TPC1 PE=1 SV=1	PREDICTED: two pore calcium channel protein 1-like [Pyrus x bretschneideri]
MD11G1076600	23.7366	48.2394	47.0215	190.726	81.9627	207.325	71.0387	110.614	62.5283	UDP-glycosyltransferase 71K2 OS=Pyrus communis GN=UGT71K2 PE=1 SV=1	RecName: Full=UDP-glycosyltransferase 71K2; AltName: Full=UDP-glucose:chalcone 2&apos;-O-glucosyltransferase; AltName: Full=UDP-glucose:flavonol 2&apos;-O-glucosyltransferase
MD14G1187200	26.9022	18.4678	29.1495	9.74765	7.3345	5.19701	5.8283	12.666	10.3034	--	PREDICTED: uncharacterized protein LOC103455261 [Malus domestica]
MD14G1238600	405.731	484.795	356.839	208.552	165.6	111.355	103.193	194.938	181.368	Nudix hydrolase 4 OS=Arabidopsis thaliana GN=NUDT4 PE=1 SV=1	PREDICTED: nudix hydrolase 17, mitochondrial-like [Malus domestica]
MD05G1336800	14.1285	4.98604	11.4877	3.21514	1.55597	2.17379	3.2794	4.26425	3.34299	Cysteine-rich receptor-like protein kinase 10 OS=Arabidopsis thaliana GN=CRK10 PE=1 SV=3	PREDICTED: cysteine-rich receptor-like protein kinase 29 [Malus domestica]
MD17G1009100	6.62884	6.05492	7.45542	24.556	12.4023	28.3453	23.5622	25.5562	15.5114	--	PREDICTED: cysteine-rich and transmembrane domain-containing protein A [Pyrus x bretschneideri]
MD03G1265600	3.64064	1.82946	2.28938	0.514	0.49088	0.591931	0.476892	0.263639	0.575264	Protein FANTASTIC FOUR 1 OS=Arabidopsis thaliana GN=FAF1 PE=2 SV=1	PREDICTED: protein FANTASTIC FOUR 1-like [Malus domestica]
MD06G1105500	1.45327	0.918362	1.73485	7.21168	3.51588	5.85615	11.9409	3.69899	1.65564	Ethylene-responsive transcription factor ERF061 OS=Arabidopsis thaliana GN=ERF061 PE=2 SV=1	DREB6.6 [Malus sieversii]
novel.208	0.30062	0.62949	0.453773	2.20638	1.41834	1.97326	0.862392	2.97611	1.49738	#N/A	#N/A
MD15G1028600	0.274069	0.350712	0.334606	2.88352	1.34881	3.72733	4.78286	5.94017	2.76618	Lysophospholipid acyltransferase LPEAT1 OS=Arabidopsis thaliana GN=LPEAT1 PE=1 SV=1	PREDICTED: lysophospholipid acyltransferase LPEAT1-like [Malus domestica]
MD02G1301300	3.44209	3.55215	5.80202	13.4941	9.4387	15.2106	10.5645	12.3264	6.83081	--	PREDICTED: protein BPS1, chloroplastic-like [Malus domestica]
MD17G1127800	0.856096	0.462546	1.25423	3.79892	2.55346	5.81438	5.45753	6.27553	3.48366	UDP-glycosyltransferase 82A1 OS=Arabidopsis thaliana GN=UGT82A1 PE=2 SV=1	PREDICTED: UDP-glycosyltransferase 82A1-like [Pyrus x bretschneideri]
MD16G1045300	5.43616	2.65005	5.8405	24.3787	10.4582	21.8531	55.2501	29.928	38.1458	Aluminum-activated malate transporter 4 OS=Arabidopsis thaliana GN=ALMT4 PE=3 SV=1	PREDICTED: aluminum-activated malate transporter 4-like isoform X2 [Malus domestica]
MD16G1045200	6.52476	3.12393	6.60039	24.3028	12.3321	22.4887	59.5272	32.9788	43.327	Aluminum-activated malate transporter 4 OS=Arabidopsis thaliana GN=ALMT4 PE=3 SV=1	PREDICTED: aluminum-activated malate transporter 4-like isoform X1 [Malus domestica]
MD08G1062500	44.916	35.1546	80.4966	199.037	128.641	195.666	275.591	232.675	221.95	--	PREDICTED: uncharacterized protein LOC103421021 [Malus domestica]
MD02G1050200	23.577	42.0713	36.8181	5.97624	14.0847	5.81323	5.68474	5.42828	10.7796	Multiprotein-bridging factor 1c OS=Arabidopsis thaliana GN=MBF1C PE=1 SV=1	PREDICTED: multiprotein-bridging factor 1c-like [Pyrus x bretschneideri]
MD15G1430300	4.01011	2.93692	2.77126	1.26719	0.913992	0.935463	1.73643	0.679964	1.38187	Brassinosteroid LRR receptor kinase BRI1 OS=Oryza sativa subsp. japonica GN=BRI1 PE=1 SV=1	PREDICTED: probably inactive leucine-rich repeat receptor-like protein kinase At3g28040 [Malus domestica]
MD14G1002500	33.1459	54.1569	47.6036	22.2021	13.8552	13.3765	10.2874	18.4431	17.7937	Glutamate dehydrogenase 1 OS=Arabidopsis thaliana GN=GDH1 PE=2 SV=1	PREDICTED: glutamate dehydrogenase 1-like [Malus domestica]
MD06G1002600	18.6146	32.5621	52.6777	167.01	83.2008	199.888	140.661	176.453	81.6556	Protein PIN-LIKES 1 OS=Arabidopsis thaliana GN=PILS1 PE=2 SV=1	PREDICTED: protein PIN-LIKES 3-like [Pyrus x bretschneideri]
MD13G1275500	1.88409	3.21463	2.38545	0.359597	0.187321	0.552157	0.0667271	0.221332	0	Gamma-glutamyl peptidase 5 OS=Arabidopsis thaliana GN=GGP5 PE=2 SV=1	PREDICTED: gamma-glutamyl peptidase 5-like [Malus domestica]
MD06G1084400	0.215212	0.165238	0	1.33085	0.885835	1.51134	1.95504	1.84305	1.38603	Transcription factor GLABRA 3 OS=Arabidopsis thaliana GN=GL3 PE=1 SV=1	PREDICTED: LOW QUALITY PROTEIN: transcription factor EGL1-like [Malus domestica]
MD05G1108800	272.543	111.076	192.91	10.9932	0.394935	3.05584	6.96381	5.5997	1.69703	Pathogenesis-related protein 1 OS=Arabidopsis thaliana GN=PRB1 PE=2 SV=1	pathogenesis-related protein 1-like precursor [Malus domestica]
MD13G1269300	6.13315	9.73431	7.98706	1.83753	3.48847	2.35125	1.59121	1.9604	1.46243	CASP-like protein 2C1 OS=Glycine max PE=2 SV=1	PREDICTED: CASP-like protein 2C1 [Pyrus x bretschneideri]
MD08G1089900	12.5849	9.23512	11.8548	23.3592	19.8802	25.603	29.8571	30.5209	33.8259	Probable E3 ubiquitin-protein ligase LUL3 OS=Arabidopsis thaliana GN=LUL3 PE=1 SV=1	PREDICTED: uncharacterized protein LOC103441074 isoform X2 [Malus domestica]
MD11G1247800	42.1142	46.9212	57.1367	114.902	82.2429	108.035	110.121	112.884	95.0322	Proton pump-interactor 1 OS=Arabidopsis thaliana GN=PPI1 PE=1 SV=2	PREDICTED: proton pump-interactor 1-like [Malus domestica]
MD01G1126500	347.212	331.532	492.572	197.913	112.88	140.501	89.7926	168.537	153.162	Heat shock cognate 70 kDa protein OS=Petunia hybrida GN=HSP70 PE=2 SV=1	PREDICTED: heat shock cognate 70 kDa protein 2 [Malus domestica]
MD07G1253800	11.0742	14.1712	14.4217	3.9286	6.03173	2.77804	2.60903	1.10297	5.01395	23.5 kDa heat shock protein, mitochondrial OS=Arabidopsis thaliana GN=HSP23.5 PE=2 SV=1	PREDICTED: 23.6 kDa heat shock protein, mitochondrial-like [Malus domestica]
MD00G1188300	1.40198	1.19603	0.760737	6.68956	12.1268	4.31413	6.70313	4.11743	5.5403	--	PREDICTED: uncharacterized protein LOC103400018 [Malus domestica]
MD05G1117500	4.20783	2.02896	5.44998	0.392824	0.163704	0.723812	1.48701	1.16056	1.31893	Dirigent protein 23 OS=Arabidopsis thaliana GN=DIR23 PE=2 SV=1	PREDICTED: dirigent protein 23-like [Malus domestica]
MD01G1113400	6.42157	4.242	15.9575	102.18	21.4078	69.445	160.225	146.842	106.383	Ethylene-responsive transcription factor RAP2-7 OS=Arabidopsis thaliana GN=RAP2-7 PE=2 SV=2	PREDICTED: ethylene-responsive transcription factor RAP2-7 [Malus domestica]
MD14G1113800	333.518	41.2544	279.736	32.9631	31.8524	12.4322	16.3315	62.2865	42.8869	Late embryogenesis abundant protein At1g64065 OS=Arabidopsis thaliana GN=At1g64065 PE=2 SV=1	PREDICTED: late embryogenesis abundant protein At1g64065-like [Malus domestica]
MD00G1005700	57.5957	26.9792	69.3583	505.812	88.3816	455.833	706.171	450.881	97.1544	Sorbitol dehydrogenase OS=Arabidopsis thaliana GN=SDH PE=1 SV=1	PREDICTED: sorbitol dehydrogenase-like [Pyrus x bretschneideri]
MD06G1182800	8.51303	2.01078	7.09597	1.30989	0.893256	0.987378	1.53794	1.28998	1.22613	Protein EDS1L OS=Arabidopsis thaliana GN=EDS1 PE=1 SV=1	PREDICTED: protein EDS1L-like [Pyrus x bretschneideri]
MD12G1190400	4.21193	5.53435	6.4308	58.3998	8.55572	36.2248	43.7018	36.009	6.63144	Serine/threonine-protein kinase AtPK2/AtPK19 OS=Arabidopsis thaliana GN=ATPK2 PE=1 SV=2	PREDICTED: serine/threonine-protein kinase AtPK2/AtPK19-like [Malus domestica]
MD12G1197200	2.44926	5.25799	2.92007	11.1105	8.56064	13.9893	16.6254	14.5403	11.2853	Phytochrome A OS=Solanum tuberosum GN=PHYA PE=2 SV=2	PREDICTED: phytochrome A-like [Pyrus x bretschneideri]
MD03G1020500	2.23862	3.94975	2.95672	21.3025	5.12163	29.5394	25.5662	18.1009	7.84937	--	PREDICTED: IRK-interacting protein-like [Malus domestica]
MD03G1066000	1.68249	1.82857	3.30911	4.8102	10.7241	14.2933	4.82657	16.1071	11.9634	Asparagine synthetase [glutamine-hydrolyzing] OS=Asparagus officinalis PE=2 SV=2	PREDICTED: asparagine synthetase [glutamine-hydrolyzing]-like [Pyrus x bretschneideri]
MD04G1019500	53.1835	36.8092	46.4713	94.1868	82.1989	112.851	89.1732	95.5357	101.787	Crocetin glucosyltransferase, chloroplastic OS=Gardenia jasminoides GN=UGT75L6 PE=1 SV=1	crocetin glucosyltransferase, chloroplastic-like [Malus domestica]
MD04G1028500	5.91306	3.31244	5.55225	12.4457	13.7839	10.8688	15.0457	22.0017	24.687	Histone-lysine N-methyltransferase ATX2 OS=Arabidopsis thaliana GN=ATX2 PE=2 SV=1	PREDICTED: histone-lysine N-methyltransferase ATX2 isoform X1 [Malus domestica]
MD09G1233700	121.765	67.2828	112.009	34.3646	44.38	23.6878	13.7958	39.3877	34.7624	Heat stress transcription factor A-4b OS=Oryza sativa subsp. japonica GN=HSFA4B PE=2 SV=1	PREDICTED: heat stress transcription factor A-4b-like [Pyrus x bretschneideri]
MD02G1261000	121.748	77.1098	115.344	50.5587	27.8101	37.9689	32.9448	31.5434	38.5981	Steroid 5-alpha-reductase DET2 OS=Gossypium hirsutum GN=DET2 PE=1 SV=1	PREDICTED: very-long-chain enoyl-CoA reductase-like [Malus domestica]
MD06G1218400	19.1719	18.9882	17.7457	4.37331	8.8019	3.28127	1.88124	4.85335	5.45076	Protein SAR DEFICIENT 1 OS=Arabidopsis thaliana GN=SARD1 PE=1 SV=1	PREDICTED: calmodulin-binding protein 60 F [Malus domestica]
MD15G1230000	1.28472	2.05058	2.46912	5.8374	4.93205	8.97693	4.914	4.20635	3.82429	Amino acid transporter ANTL1 OS=Arabidopsis thaliana GN=At2g42005 PE=2 SV=1	PREDICTED: amino acid transporter ANTL1-like [Pyrus x bretschneideri]
MD06G1032200	18.2264	31.1665	34.1377	89.4357	60.4634	72.3753	54.4905	85.9792	56.0638	Plant intracellular Ras-group-related LRR protein 5 OS=Oryza sativa subsp. japonica GN=IRL5 PE=2 SV=1	PREDICTED: plant intracellular Ras-group-related LRR protein 5-like [Malus domestica]
MD08G1032500	2.81764	2.73992	3.32936	5.63536	9.87337	6.76261	7.91342	10.6244	12.6709	J domain-containing protein required for chloroplast accumulation response 1 OS=Arabidopsis thaliana GN=JAC1 PE=1 SV=1	PREDICTED: J domain-containing protein required for chloroplast accumulation response 1-like isoform X2 [Pyrus x bretschneideri]
MD08G1208100	2.58029	3.12808	2.98443	7.75646	6.13668	7.92505	15.7781	11.343	9.13785	Protein SABRE OS=Arabidopsis thaliana GN=SAB PE=1 SV=1	protein SABRE isoform X1 [Prunus persica]
MD08G1218200	12.726	16.4236	18.2104	81.3515	26.1307	109.06	59.7883	80.6375	12.2328	Patellin-5 OS=Arabidopsis thaliana GN=PATL5 PE=1 SV=2	PREDICTED: patellin-3-like [Malus domestica]
MD03G1029100	28.5801	18.9597	24.3132	75.3718	42.7259	65.2809	69.5212	91.512	59.5266	Cellulose synthase-like protein E6 OS=Oryza sativa subsp. japonica GN=CSLE6 PE=2 SV=1	PREDICTED: cellulose synthase-like protein E6 [Pyrus x bretschneideri]
MD12G1197000	5.12118	3.909	6.71307	14.0055	14.8327	13.5963	19.3305	10.6865	22.0225	--	PREDICTED: uncharacterized protein LOC108172041 [Malus domestica]
MD15G1391000	20.1537	3.36431	8.53212	2.20553	0.759096	1.31532	2.7625	4.04827	3.21774	G-type lectin S-receptor-like serine/threonine-protein kinase LECRK3 OS=Oryza sativa subsp. japonica GN=LECRK3 PE=3 SV=2	PREDICTED: G-type lectin S-receptor-like serine/threonine-protein kinase LECRK3 [Malus domestica]
MD00G1062100	2.21297	2.54865	2.59371	5.60694	4.75242	6.27463	7.40643	6.62917	5.06982	Mitochondrial succinate-fumarate transporter 1 OS=Arabidopsis thaliana GN=SFC1 PE=2 SV=1	PREDICTED: mitochondrial succinate-fumarate transporter 1-like [Malus domestica]
MD02G1041600	1.49897	2.13129	1.75687	9.95609	4.29212	9.58761	10.7025	10.9881	3.26598	--	PREDICTED: tudor domain-containing protein 3-like isoform X2 [Malus domestica]
MD08G1010400	4.05105	0.86108	1.46544	0.269443	0.414971	0.283313	0.117387	0.288421	0.262224	ABC transporter B family member 13 OS=Arabidopsis thaliana GN=ABCB13 PE=3 SV=1	PREDICTED: ABC transporter B family member 13-like [Malus domestica]
MD06G1120600	0.884547	0.764944	0.745596	0.322617	0.216848	0.215728	0.32443	0.281843	0.291186	Retrovirus-related Pol polyprotein from transposon TNT 1-94 OS=Nicotiana tabacum PE=2 SV=1	hypothetical protein VITISV_015109 [Vitis vinifera]
MD01G1121100	13.2173	20.1668	13.8811	5.0453	6.10418	2.34284	3.17103	3.60625	6.78508	--	PREDICTED: uncharacterized protein LOC103434459 [Malus domestica]
MD08G1037600	51.7808	15.2981	34.478	166.277	88.698	203.614	242.895	215.802	219.382	Protein DETOXIFICATION 33 OS=Arabidopsis thaliana GN=DTX33 PE=2 SV=1	PREDICTED: protein DETOXIFICATION 33-like [Malus domestica]
MD15G1086800	4.95002	5.07251	8.46441	32.8624	12.3435	21.6424	44.9317	37.1061	25.434	--	PREDICTED: uncharacterized protein LOC103455994 isoform X1 [Malus domestica]
MD10G1299600	2.9862	2.0474	4.00815	21.651	4.85233	30.569	21.8631	21.3451	2.76479	--	PREDICTED: uncharacterized protein LOC103446447 [Malus domestica]
MD15G1288600	119.747	163.603	289.116	722.06	449.343	696.359	537.364	548.52	342.334	Transcription factor MYB44 OS=Arabidopsis thaliana GN=MYB44 PE=2 SV=1	transcription factor MYB44-like [Malus domestica]
MD01G1078000	179.791	89.9977	154.641	31.0321	59.8985	23.8818	18.7853	38.5666	54.1136	Probable WRKY transcription factor 53 OS=Arabidopsis thaliana GN=WRKY53 PE=1 SV=1	probable WRKY transcription factor 46 [Malus domestica]
MD12G1166600	9.3562	11.4359	8.87108	22.3686	16.4991	22.973	27.3111	24.2384	21.5109	Putative E3 ubiquitin-protein ligase XBAT35 OS=Arabidopsis thaliana GN=XBAT35 PE=2 SV=1	PREDICTED: uncharacterized protein LOC103452949 [Malus domestica]
MD12G1022700	3.46909	0.263716	2.48251	23.954	17.7029	12.6039	63.7179	43.9769	30.1767	Cytochrome P450 94C1 OS=Arabidopsis thaliana GN=CYP94C1 PE=2 SV=1	PREDICTED: cytochrome P450 94C1-like [Pyrus x bretschneideri]
MD11G1054600	0.355532	0.37467	0.643435	3.25114	0.916966	2.70979	5.03959	3.78104	1.02525	Putative disease resistance protein RGA3 OS=Solanum bulbocastanum GN=RGA3 PE=2 SV=2	PREDICTED: putative disease resistance protein RGA4 isoform X1 [Pyrus x bretschneideri]
MD16G1127400	72.8446	84.6361	128.719	320.691	187.067	267.076	364.287	352.896	318.156	Protein TIFY 9 OS=Arabidopsis thaliana GN=TIFY9 PE=1 SV=1	PREDICTED: protein TIFY 9-like [Pyrus x bretschneideri]
MD07G1097300	6.43873	7.35338	11.4618	45.8904	15.6115	39.9057	34.7073	40.241	16.571	Trihelix transcription factor ASIL2 OS=Arabidopsis thaliana GN=ASIL2 PE=2 SV=1	PREDICTED: trihelix transcription factor ASIL2-like [Malus domestica]
MD02G1179400	0.77562	1.48091	1.01007	2.98185	3.63538	6.42951	3.49647	5.15454	2.84022	UDP-glycosyltransferase 84B2 OS=Arabidopsis thaliana GN=UGT84B2 PE=3 SV=1	PREDICTED: UDP-glycosyltransferase 84B2-like [Malus domestica]
MD06G1205300	12.5272	21.3376	17.7705	7.6486	4.99467	7.1646	4.84864	8.55948	4.99688	Isoaspartyl peptidase/L-asparaginase 1 OS=Arabidopsis thaliana GN=At5g08100 PE=1 SV=2	PREDICTED: isoaspartyl peptidase/L-asparaginase 1-like [Malus domestica]
MD08G1030400	12.5945	15.8676	31.7713	6.5189	4.17947	5.36234	5.50326	7.8484	3.92856	Protein RADIALIS-like 6 OS=Arabidopsis thaliana GN=RL6 PE=2 SV=1	PREDICTED: protein RADIALIS-like 3 [Pyrus x bretschneideri]
MD15G1216800	3.96071	2.60364	6.49767	23.1789	9.37411	20.3506	29.8727	34.4611	21.0137	F-box protein SKP2A OS=Arabidopsis thaliana GN=SKP2A PE=1 SV=1	PREDICTED: uncharacterized protein LOC103400946 [Malus domestica]
MD09G1042900	5.07168	2.51932	1.69299	0.551382	0.0574451	0.190494	0.061389	0.678752	1.2342	Transcription factor MYB35 OS=Arabidopsis thaliana GN=MYB35 PE=2 SV=1	PREDICTED: transcription factor MYB35-like [Malus domestica]
MD01G1094000	3.54374	0.867109	1.01958	0.188751	0.024581	0.217369	0.0788059	0.116176	0.501715	Protein NTM1-like 9 OS=Arabidopsis thaliana GN=NTL9 PE=1 SV=1	PREDICTED: NAC domain-containing protein 83-like isoform X2 [Malus domestica]
MD02G1165600	77.9125	57.9418	76.5878	38.965	33.6734	25.3796	30.081	27.4091	31.8595	Probable disease resistance protein At5g66900 OS=Arabidopsis thaliana GN=At5g66900 PE=3 SV=1	PREDICTED: probable disease resistance protein At5g66890 [Pyrus x bretschneideri]
MD10G1274600	137.876	119.072	126.432	55.4509	73.8628	41.7088	37.1828	74.9136	71.3106	U-box domain-containing protein 17 OS=Arabidopsis thaliana GN=PUB17 PE=2 SV=1	PREDICTED: U-box domain-containing protein 17-like [Malus domestica]
MD17G1105800	78.499	13.9982	29.8243	7.04642	8.38377	6.1461	5.75627	9.80333	6.53302	Palmitoyl-monogalactosyldiacylglycerol delta-7 desaturase, chloroplastic OS=Arabidopsis thaliana GN=ADS3 PE=1 SV=2	PREDICTED: palmitoyl-monogalactosyldiacylglycerol delta-7 desaturase, chloroplastic-like [Malus domestica]
MD04G1208600	76.9134	53.0976	112.752	14.228	32.0183	10.3929	2.7156	22.3187	13.4215	E3 ubiquitin-protein ligase ATL6 OS=Arabidopsis thaliana GN=ATL6 PE=1 SV=2	PREDICTED: E3 ubiquitin-protein ligase ATL6 [Malus domestica]
MD04G1011700	157.02	71.3408	124.599	36.5967	46.0334	21.012	14.0512	46.1371	53.7122	TMV resistance protein N OS=Nicotiana glutinosa GN=N PE=1 SV=1	TIR-NBS-LRR-type disease resistance-like protein [Pyrus x bretschneideri]
MD16G1209000	8.27187	7.66595	12.1769	29.4912	17.1464	33.6977	27.2293	34.6993	17.2182	--	PREDICTED: uncharacterized protein LOC103425717 [Malus domestica]
novel.229	0	0	0	1.711	0.553216	1.08713	2.69323	1.45258	1.25461	#N/A	#N/A
MD02G1093200	0.659538	0.122316	1.20433	3.86669	5.82459	4.28277	24.514	23.7085	42.6141	Flavonoid 3&apos;-monooxygenase OS=Arabidopsis thaliana GN=CYP75B1 PE=1 SV=1	PREDICTED: flavonoid 3&apos;-monooxygenase-like [Malus domestica]
MD11G1048400	94.5921	62.7566	112.737	41.3933	34.1364	23.39	19.2492	35.7885	23.8962	Calcium uniporter protein 6, mitochondrial OS=Arabidopsis thaliana GN=At1g09575 PE=2 SV=1	PREDICTED: calcium uniporter protein 6, mitochondrial-like [Malus domestica]
MD01G1017900	64.1428	65.9811	71.2734	163.035	104.152	140.23	199.032	225.182	193.283	Uncharacterized aarF domain-containing protein kinase At1g79600, chloroplastic OS=Arabidopsis thaliana GN=At1g79600 PE=2 SV=1	PREDICTED: uncharacterized protein sll1770 [Malus domestica]
MD05G1311600	14.7944	19.8571	36.4134	71.749	62.5718	98.8211	53.381	98.2294	67.6916	Ethylene-responsive transcription factor 12 OS=Arabidopsis thaliana GN=ERF12 PE=2 SV=1	PREDICTED: ethylene-responsive transcription factor 12-like [Malus domestica]
MD11G1316100	4.70789	5.87491	6.11467	34.477	8.40287	38.1439	39.9181	27.138	5.63269	--	PREDICTED: uncharacterized protein LOC103449222 [Malus domestica]
MD07G1254500	11.8139	3.7638	9.3535	28.5541	29.5804	28.5816	73.6395	46.8889	69.9849	Acid beta-fructofuranosidase 1, vacuolar OS=Rosa hybrid cultivar PE=1 SV=1	PREDICTED: beta-fructofuranosidase, soluble isoenzyme I-like [Malus domestica]
MD17G1218300	10.8886	4.96669	23.1141	123.061	38.6909	72.9605	90.1575	134.22	72.6304	Putative UPF0481 protein At3g02645 OS=Arabidopsis thaliana GN=At3g02645 PE=3 SV=1	PREDICTED: putative UPF0481 protein At3g02645 [Malus domestica]
MD01G1057300	5.2018	3.34265	3.85997	1.79867	1.17876	1.4366	1.13049	1.99989	1.1364	Probable LRR receptor-like serine/threonine-protein kinase IRK OS=Arabidopsis thaliana GN=IRK PE=1 SV=1	PREDICTED: LRR receptor-like serine/threonine-protein kinase ERECTA [Pyrus x bretschneideri]
MD15G1363900	17.8958	26.4599	24.2632	10.233	11.3517	11.7367	8.62549	12.4438	9.27338	Protein MARD1 OS=Arabidopsis thaliana GN=MARD1 PE=2 SV=2	hypothetical protein [Pyrus x bretschneideri]
MD15G1200400	6.88149	6.39693	7.92639	2.60869	0.934255	2.39398	0.771488	1.5053	0.912381	Nudix hydrolase 8 OS=Arabidopsis thaliana GN=NUDT8 PE=2 SV=2	PREDICTED: nudix hydrolase 8-like [Malus domestica]
MD04G1202100	71.9795	37.1762	61.6119	10.5216	23.7234	8.25877	10.4322	18.6227	22.2039	#N/A	#N/A
MD14G1123000	218.401	125.487	242.716	38.0407	76.8265	21.8548	13.6305	37.87	40.0835	Probable WRKY transcription factor 41 OS=Arabidopsis thaliana GN=WRKY41 PE=2 SV=2	PREDICTED: probable WRKY transcription factor 53 [Malus domestica]
MD12G1218200	23.2321	7.32311	12.8446	3.43406	4.79856	2.99884	6.25146	3.16548	4.11659	Probable linoleate 9S-lipoxygenase 5 OS=Solanum tuberosum GN=LOX1.5 PE=2 SV=1	probable linoleate 9S-lipoxygenase 5 [Malus domestica]
MD15G1432700	56.4919	32.02	49.5713	21.7223	17.8006	13.2016	14.7954	25.4818	18.6728	TMV resistance protein N OS=Nicotiana glutinosa GN=N PE=1 SV=1	PREDICTED: TMV resistance protein N-like [Malus domestica]
novel.140	0.118223	0.134474	0.0769794	0.84615	0.811027	1.28626	1.65805	2.70819	1.70461	#N/A	#N/A
MD10G1010500	27.6242	27.7302	21.0978	5.30705	12.6844	6.57392	5.06459	7.52117	7.98602	--	PREDICTED: uncharacterized protein LOC103444562 [Malus domestica]
MD14G1227200	2.5676	2.36629	2.03186	0.772638	0.905583	1.16784	0.501799	0.812412	1.04488	Synaptotagmin-5 OS=Arabidopsis thaliana GN=SYT5 PE=2 SV=1	PREDICTED: synaptotagmin-5-like isoform X1 [Malus domestica]
MD07G1024500	18.176	15.8631	26.8549	53.7391	41.0246	44.7154	40.6811	56.0669	47.6072	--	PREDICTED: protein PNS1-like [Malus domestica]
MD02G1308300	0.550114	2.4508	0.477601	0	0.0546938	0	0	0	0	Peptidyl-prolyl cis-trans isomerase FKBP42 OS=Arabidopsis thaliana GN=FKBP42 PE=1 SV=1	PREDICTED: peptidyl-prolyl cis-trans isomerase FKBP42-like isoform X2 [Malus domestica]
MD08G1214100	12.1375	2.39609	14.1082	139.569	34.6466	51.493	54.0031	71.481	38.9545	Ethylene-responsive transcription factor ERF019 OS=Arabidopsis thaliana GN=ERF019 PE=2 SV=1	PREDICTED: ethylene-responsive transcription factor ERF019-like [Pyrus x bretschneideri]
MD11G1171100	67.709	20.0533	96.4532	305.418	314.41	230.93	309.787	392.364	367.88	Cytochrome P450 94C1 OS=Arabidopsis thaliana GN=CYP94C1 PE=2 SV=1	PREDICTED: cytochrome P450 94C1-like [Malus domestica]
MD16G1083800	1.00897	2.38828	1.38798	5.07739	3.94193	6.90139	5.13661	8.32368	6.76171	DExH-box ATP-dependent RNA helicase DExH15 chloroplastic OS=Arabidopsis thaliana GN=ISE2 PE=1 SV=2	PREDICTED: DExH-box ATP-dependent RNA helicase DExH15 chloroplastic [Malus domestica]
MD13G1094900	1.19898	2.5349	1.6293	0.223863	0.279875	0.360926	0.0498483	0.440921	0.60131	Axial regulator YABBY 4 OS=Arabidopsis thaliana GN=YAB4 PE=1 SV=2	PREDICTED: axial regulator YABBY 4 [Malus domestica]
MD16G1273400	14.865	16.0717	14.1082	5.1528	8.37741	7.29472	5.55424	6.54511	7.41991	--	PREDICTED: uncharacterized protein LOC103427655 [Malus domestica]
MD11G1215100	8.89906	0.73469	2.24304	0.123277	0.428114	0.141967	1.05226	0.252922	0.919799	GDSL esterase/lipase At5g55050 OS=Arabidopsis thaliana GN=At5g55050 PE=2 SV=1	PREDICTED: GDSL esterase/lipase At5g55050-like [Malus domestica]
MD15G1054100	2.27816	2.461	2.98874	7.82657	4.39062	6.7199	8.39157	6.45626	5.33858	Protein PLASTID MOVEMENT IMPAIRED 1-RELATED 2 OS=Arabidopsis thaliana GN=PMIR2 PE=2 SV=1	PREDICTED: protein PLASTID MOVEMENT IMPAIRED 1-RELATED 1-like [Pyrus x bretschneideri]
MD15G1243500	9.76539	9.45376	7.32181	23.2882	15.345	33.0558	52.2882	42.1601	10.4714	Histidine kinase 1 OS=Arabidopsis thaliana GN=AHK1 PE=1 SV=2	histidine kinase 1-like [Malus domestica]
MD00G1187500	1.5072	1.778	1.28808	2.73056	3.74038	3.36584	7.25121	4.27011	2.89755	--	PREDICTED: uncharacterized protein LOC103446557 [Malus domestica]
MD15G1278100	256.822	212.169	253.818	55.4697	126.525	56.6767	29.3546	91.8977	60.0715	Probable disease resistance protein At5g66900 OS=Arabidopsis thaliana GN=At5g66900 PE=3 SV=1	PREDICTED: probable disease resistance protein At5g66900 [Malus domestica]
MD13G1040500	5.98165	4.16163	6.52299	12.6192	13.8227	11.2584	28.766	13.3853	23.6133	--	PREDICTED: uncharacterized protein LOC103423851 [Malus domestica]
MD05G1184400	0.174223	0.0743148	0.255247	1.38412	0.818451	2.49867	1.24949	0.690753	0.83735	Glutathione transferase GST 23 OS=Zea mays PE=2 SV=1	PREDICTED: glutathione transferase GST 23-like [Malus domestica]
MD00G1070000	9.20293	22.1751	11.5934	98.2047	23.6625	139.807	69.3597	90.8264	24.6972	F-box protein CPR30 OS=Arabidopsis thaliana GN=CPR30 PE=1 SV=2	PREDICTED: F-box/kelch-repeat protein At3g06240-like [Malus domestica]
MD07G1216200	23.4653	6.87716	46.4644	196.2	128.99	119.22	331.052	284.382	323.752	Anthranilate synthase alpha subunit 1, chloroplastic OS=Arabidopsis thaliana GN=ASA1 PE=1 SV=1	PREDICTED: anthranilate synthase alpha subunit 1, chloroplastic-like [Malus domestica]
MD07G1004400	35.9062	25.2967	29.7649	17.1971	12.8201	11.3832	8.75916	14.8994	10.4983	Uncharacterized protein At1g04910 OS=Arabidopsis thaliana GN=At1g04910 PE=2 SV=1	PREDICTED: uncharacterized protein At1g04910-like [Malus domestica]
MD13G1147300	17.8889	18.1497	27.8931	100.251	35.9014	87.8048	86.935	95.1071	60.1227	Probable protein phosphatase 2C 13 OS=Arabidopsis thaliana GN=At1g48040 PE=2 SV=2	PREDICTED: probable protein phosphatase 2C 13 [Malus domestica]
MD16G1089800	7.84893	4.76873	8.71295	17.986	16.3335	15.3798	25.6541	20.6241	17.7839	Probable alpha,alpha-trehalose-phosphate synthase [UDP-forming] 9 OS=Arabidopsis thaliana GN=TPS9 PE=2 SV=1	PREDICTED: probable alpha,alpha-trehalose-phosphate synthase [UDP-forming] 9 [Malus domestica]
MD14G1190900	0.129654	0.193564	0.0633172	0.723816	1.18916	0.897678	2.32463	0.719668	2.86646	AAA-ATPase ASD, mitochondrial OS=Arabidopsis thaliana GN=AATP1 PE=1 SV=1	PREDICTED: AAA-ATPase At3g28580-like [Pyrus x bretschneideri]
MD10G1120800	9.99443	11.4129	7.66048	19.3331	17.2545	21.9761	22.6605	19.1435	17.1354	Translocase of chloroplast 132, chloroplastic OS=Arabidopsis thaliana GN=TOC132 PE=1 SV=1	PREDICTED: translocase of chloroplast 120, chloroplastic-like [Malus domestica]
MD13G1109600	125.104	22.0749	51.892	10.9654	13.2865	14.3485	1.45551	1.54361	4.70789	ABC transporter C family member 3 OS=Arabidopsis thaliana GN=ABCC3 PE=1 SV=1	PREDICTED: putative ABC transporter C family member 15 isoform X1 [Malus domestica]
MD08G1127900	2.88049	2.53661	3.53943	8.41946	5.61223	9.42027	21.1469	17.2903	11.8792	F-box protein AFR OS=Arabidopsis thaliana GN=AFR PE=1 SV=2	PREDICTED: F-box protein AFR-like [Malus domestica]
MD01G1235500	7.73766	4.59563	6.86387	23.5752	11.6782	19.7143	36.6205	22.4454	18.5473	D-xylose-proton symporter-like 2 OS=Arabidopsis thaliana GN=At5g17010 PE=1 SV=1	PREDICTED: D-xylose-proton symporter-like 2 [Malus domestica]
MD07G1201600	20.9057	44.2706	34.2858	80.9401	87.0146	80.146	100.347	58.7381	78.364	Aspartic proteinase PCS1 OS=Arabidopsis thaliana GN=PCS1 PE=2 SV=1	PREDICTED: aspartic proteinase PCS1-like [Malus domestica]
MD06G1115100	0	0.0977996	0	2.75691	2.25677	1.81423	4.05606	3.63617	2.31413	#N/A	#N/A
MD13G1010600	1.61921	1.78238	1.73454	4.08235	4.11293	6.61282	5.14451	3.86567	3.61497	protein SLOW GREEN 1, chloroplastic OS=Arabidopsis thaliana GN=SG1 PE=1 SV=1	PREDICTED: protein SLOW GREEN 1, chloroplastic-like [Malus domestica]
MD01G1093700	14.8209	16.079	14.7488	6.14847	1.45129	2.10207	2.7275	3.2522	3.97825	Protein NTM1-like 9 OS=Arabidopsis thaliana GN=NTL9 PE=1 SV=1	PREDICTED: protein NTM1-like 9 [Malus domestica]
MD01G1120400	0.122036	1.92602	0.178791	5.50271	10.8653	12.0705	4.66783	7.87055	13.0796	--	PREDICTED: uncharacterized protein LOC103426379 [Malus domestica]
MD15G1186500	22.609	37.9505	31.5901	57.7153	72.3059	82.513	65.059	66.0676	67.2104	Ras-related protein RABF2a OS=Arabidopsis thaliana GN=RABF2A PE=1 SV=1	PREDICTED: ras-related protein RHN1-like [Malus domestica]
MD13G1215600	8.35364	9.07342	9.79929	4.25304	1.61827	2.85354	4.89989	4.05182	2.7318	Putative protein phosphatase 2C-like protein 44 OS=Arabidopsis thaliana GN=At3g23360 PE=5 SV=1	PREDICTED: putative protein phosphatase 2C-like protein 44 [Malus domestica]
MD11G1242900	2.55834	3.16985	3.24243	22.3652	4.7692	14.55	18.9303	17.485	10.188	CBS domain-containing protein CBSX5 OS=Arabidopsis thaliana GN=CBSX5 PE=2 SV=2	PREDICTED: CBS domain-containing protein CBSX5-like [Malus domestica]
MD06G1207200	0.160334	0.501531	0.3132	1.74428	1.67379	1.90302	0.766588	1.80818	1.28433	--	PREDICTED: uncharacterized protein LOC103420363 [Malus domestica]
MD10G1052000	0.388013	0	0.0947439	2.41608	2.69077	1.82295	3.80308	4.10235	4.56893	Probable sodium/metabolite cotransporter BASS3, chloroplastic OS=Arabidopsis thaliana GN=BASS3 PE=2 SV=1	PREDICTED: probable sodium/metabolite cotransporter BASS3, chloroplastic [Malus domestica]
MD14G1175000	2.27695	1.80171	2.77183	0.736894	0.442918	0.848619	0.599547	1.08156	0.951605	Tryptophan aminotransferase-related protein 2 OS=Arabidopsis thaliana GN=TAR2 PE=2 SV=1	PREDICTED: tryptophan aminotransferase-related protein 2-like [Malus domestica]
MD10G1190400	9.959	9.00103	11.1555	53.893	15.5793	41.5368	42.3881	25.4766	20.92	Cytochrome P450 94A1 OS=Vicia sativa GN=CYP94A1 PE=2 SV=2	PREDICTED: cytochrome P450 94A1-like isoform X2 [Pyrus x bretschneideri]
MD17G1114400	4.63582	4.39613	5.81041	17.225	7.99365	18.2426	26.103	30.9225	8.05165	Zinc finger CCCH domain-containing protein 18 OS=Arabidopsis thaliana GN=At2g05160 PE=2 SV=1	PREDICTED: zinc finger CCCH domain-containing protein 18 isoform X2 [Malus domestica]
MD09G1248700	38.9064	62.3442	71.1001	24.025	20.1597	10.2993	21.9511	20.7174	22.3844	E3 ubiquitin-protein ligase RMA1H1 OS=Capsicum annuum GN=RMA1H1 PE=1 SV=1	PREDICTED: E3 ubiquitin-protein ligase RMA1H1-like [Malus domestica]
MD15G1263000	3.04184	5.59704	2.47582	0.64033	1.33424	0.825904	0.741438	0.567537	0.945979	Scarecrow-like protein 4 OS=Arabidopsis thaliana GN=SCL4 PE=2 SV=1	PREDICTED: scarecrow-like protein 4 [Malus domestica]
MD13G1265500	34.1322	21.4567	39.6848	139.632	57.9467	104.873	251.541	175.43	129.073	CBL-interacting serine/threonine-protein kinase 21 OS=Arabidopsis thaliana GN=CIPK21 PE=1 SV=1	CBL-interacting serine/threonine-protein kinase 21 [Malus domestica]
MD15G1335300	6.19632	1.63617	4.61104	0	0.264023	0	0	0	0	--	hypothetical protein PRUPE_6G166000 [Prunus persica]
MD09G1200600	23.7164	27.0957	39.7798	57.2212	74.9126	72.0306	102.414	95.8683	128.002	--	PREDICTED: uncharacterized protein LOC103422034 isoform X3 [Malus domestica]
MD10G1153200	1.84044	1.16302	1.13181	0.0585444	0.121988	0.0674207	0	0	0	EPIDERMAL PATTERNING FACTOR-like protein 9 OS=Arabidopsis thaliana GN=EPFL9 PE=1 SV=1	PREDICTED: EPIDERMAL PATTERNING FACTOR-like protein 9 [Malus domestica]
MD13G1118800	214.682	335.223	247.2	108.795	148.538	116.779	57.1655	85.402	110.973	REF/SRPP-like protein At1g67360 OS=Arabidopsis thaliana GN=At1g67360 PE=2 SV=1	PREDICTED: REF/SRPP-like protein At1g67360 [Malus domestica]
MD12G1187100	2798.96	1583.53	2444.75	608.076	1001.76	332.072	1250.95	647.238	888.362	Non-specific lipid-transfer protein OS=Malus domestica GN=MALD3 PE=1 SV=1	non-specific lipid-transfer protein precursor [Malus domestica]
novel.289	0.0928104	0.712589	0.151081	2.39136	2.15922	2.47854	1.47914	2.58397	1.10029	#N/A	#N/A
MD01G1153400	5.56806	11.9835	5.96326	2.15393	2.61806	3.10063	2.86917	2.22536	4.49129	Protein SMAX1-LIKE 7 OS=Arabidopsis thaliana GN=SMXL7 PE=1 SV=1	PREDICTED: protein SMAX1-LIKE 7-like [Malus domestica]
MD01G1108900	13.017	10.8247	15.659	52.4893	22.7878	35.9083	116.937	71.8113	68.4743	Chorismate synthase, chloroplastic OS=Arabidopsis thaliana GN=EMB1144 PE=2 SV=2	PREDICTED: chorismate synthase, chloroplastic-like [Malus domestica]
MD07G1206500	20.6761	19.556	17.3409	10.0372	5.56372	8.59514	4.513	13.7022	4.24857	Cucumisin OS=Cucumis melo PE=1 SV=1	PREDICTED: cucumisin-like isoform X1 [Malus domestica]
MD08G1095700	186.61	109.402	202.043	81.7701	56.7804	63.5338	59.7149	70.3838	66.0608	SUMO-conjugating enzyme SCE1 OS=Arabidopsis thaliana GN=SCE1 PE=1 SV=1	PREDICTED: SUMO-conjugating enzyme SCE1-like [Malus domestica]
MD11G1236200	0.364012	0.155269	0.177767	0.911865	1.8186	1.08012	1.33431	1.79601	1.98278	(-)-alpha-pinene synthase OS=Fragaria vesca PE=1 SV=2	PREDICTED: (-)-alpha-pinene synthase-like [Malus domestica]
MD04G1172200	9.23222	8.67052	13.2094	21.4577	25.1454	19.3844	42.3985	30.9097	49.1594	CBL-interacting serine/threonine-protein kinase 14 OS=Arabidopsis thaliana GN=CIPK14 PE=1 SV=1	CBL-interacting serine/threonine-protein kinase 14-like [Malus domestica]
MD02G1299700	0	0	0.0843197	1.14927	0.656615	1.15275	1.23829	1.14093	0.58089	Acyl-CoA--sterol O-acyltransferase 1 OS=Arabidopsis thaliana GN=ASAT1 PE=1 SV=1	PREDICTED: acyl-CoA--sterol O-acyltransferase 1-like [Malus domestica]
MD05G1109100	321.488	72.6096	243.004	53.9129	9.84899	30.289	48.9786	39.4053	40.7497	Pathogenesis-related protein 1 OS=Arabidopsis thaliana GN=PRB1 PE=2 SV=1	PREDICTED: pathogenesis-related protein 1-like [Malus domestica]
MD10G1257300	9.34316	10.6767	8.44957	17.1224	28.8998	18.1592	44.0095	22.6834	27.1463	CSC1-like protein ERD4 OS=Brassica juncea GN=ERD4 PE=3 SV=2	PREDICTED: CSC1-like protein ERD4 [Malus domestica]
MD16G1263400	0.280232	0.717197	0.410557	5.5357	2.00602	5.26631	10.5847	1.77768	0.942794	30S ribosomal protein S2, chloroplastic OS=Ranunculus macranthus GN=rps2 PE=3 SV=1	hypothetical protein AMTR_s00390p00012910 [Amborella trichopoda]
MD14G1064600	9.71194	5.45341	14.6379	53.6045	19.7333	43.8039	47.016	40.4819	22.9044	--	PREDICTED: uncharacterized protein LOC103936952 [Pyrus x bretschneideri]
MD06G1209900	1.92169	2.11922	2.65518	0.241535	0.79686	0.324514	0.76193	0.247774	0.720862	--	PREDICTED: uncharacterized protein LOC103437952 [Malus domestica]
MD16G1007400	5.77415	2.04884	4.86608	1.25078	1.25739	0.732847	0.659643	2.02594	1.15427	Phytosulfokine receptor 1 OS=Daucus carota GN=PSKR PE=1 SV=1	PREDICTED: phytosulfokine receptor 1-like [Malus domestica]
MD10G1039000	27.2849	17.3748	26.0461	93.4791	38.3907	81.4853	73.6146	94.1743	57.561	TMV resistance protein N OS=Nicotiana glutinosa GN=N PE=1 SV=1	PREDICTED: TMV resistance protein N-like [Malus domestica]
MD09G1221600	0.26788	0.228529	0.448527	3.02384	0.753344	2.76313	3.03729	5.05753	1.02999	Probable carboxylesterase SOBER1-like OS=Arabidopsis thaliana GN=At4g22300 PE=2 SV=1	PREDICTED: acyl-protein thioesterase 2-like [Malus domestica]
MD07G1187400	334.577	306.903	320.939	76.8752	178.323	80.9836	70.4608	76.7982	74.3169	3-ketoacyl-CoA synthase 19 OS=Arabidopsis thaliana GN=KCS19 PE=2 SV=1	PREDICTED: 3-ketoacyl-CoA synthase 19-like [Pyrus x bretschneideri]
MD09G1179800	22.4689	21.1269	29.7846	89.4612	39.1921	72.4746	132.741	127.679	117.082	--	PREDICTED: inter-alpha-trypsin inhibitor heavy chain H3-like [Malus domestica]
MD17G1090100	0.139599	0.0952734	0.163617	0.719384	0.599585	1.15984	7.18173	2.89283	5.7164	Tricyclene synthase EBOS, chloroplastic OS=Lotus japonicus GN=EBOS PE=1 SV=1	(E)-beta-ocimene synthase [Malus domestica]
MD13G1115700	0.362314	0.0280991	0.257364	0.961833	2.5936	1.85696	7.08665	1.49743	4.27423	Geraniol 8-hydroxylase OS=Catharanthus roseus GN=CYP76B6 PE=1 SV=1	PREDICTED: geraniol 8-hydroxylase-like [Malus domestica]
MD00G1170700	6.04762	3.76677	5.41623	1.56363	2.43421	1.05558	2.18112	0.929227	1.70977	MDIS1-interacting receptor like kinase 2 OS=Arabidopsis thaliana GN=MIK2 PE=1 SV=3	PREDICTED: MDIS1-interacting receptor like kinase 2-like [Malus domestica]
MD13G1140000	0.202152	0.280241	0.246804	0.737895	1.58275	0.999731	2.92374	0.614471	0.51008	Late embryogenesis abundant protein D-29 OS=Gossypium hirsutum PE=3 SV=1	PREDICTED: late embryogenesis abundant protein D-29-like [Malus domestica]
MD04G1229200	3.71615	5.06647	4.95253	25.802	6.58829	26.8285	30.8193	12.5947	11.3172	Phosphoenolpyruvate carboxylase kinase 1 OS=Arabidopsis thaliana GN=PPCK1 PE=1 SV=1	PREDICTED: phosphoenolpyruvate carboxylase kinase 1-like [Pyrus x bretschneideri]
MD13G1228800	2.82223	1.90605	2.27411	5.87802	4.33516	8.3743	8.95074	13.0792	9.7436	Probable leucine-rich repeat receptor-like protein kinase At2g33170 OS=Arabidopsis thaliana GN=At2g33170 PE=2 SV=1	PREDICTED: probable leucine-rich repeat receptor-like protein kinase At2g33170 [Pyrus x bretschneideri]
MD11G1134600	1.16369	1.82451	1.87384	4.05187	3.40526	4.82174	5.17286	4.8216	2.66043	Probable E3 ubiquitin-protein ligase LOG2 OS=Arabidopsis thaliana GN=LOG2 PE=1 SV=1	PREDICTED: probable E3 ubiquitin-protein ligase LUL2 [Malus domestica]
MD15G1186200	6.49334	6.47384	9.93341	31.3115	12.8106	36.9874	44.8108	43.59	32.6371	--	PREDICTED: uncharacterized protein LOC100257802 isoform X1 [Vitis vinifera]
MD06G1035300	220.015	178.962	292.268	78.7457	123.591	62.9511	40.006	119.523	105.601	--	PREDICTED: uncharacterized protein LOC103436902 [Malus domestica]
MD02G1034700	1.86264	1.31267	2.90026	6.46862	4.42037	7.15567	12.5195	7.73455	7.99213	--	PREDICTED: uncharacterized protein LOC103448273 [Malus domestica]
MD17G1263500	9.24499	14.2059	10.4983	4.97462	5.18274	5.45342	5.21903	4.12176	3.26558	E3 ubiquitin-protein ligase RING1-like OS=Arabidopsis thaliana GN=At3g19950 PE=1 SV=1	PREDICTED: probable E3 ubiquitin-protein ligase RHB1A [Malus domestica]
MD16G1162800	3.1789	3.03368	4.63098	9.30142	7.47283	15.2948	7.88283	12.3045	4.92018	Ethylene-responsive transcription factor RAP2-3 OS=Arabidopsis thaliana GN=RAP2-3 PE=1 SV=2	ethylene-responsive transcription factor RAP2-3 [Malus domestica]
novel.552	7.70004	4.64558	7.99497	2.94919	1.76906	2.6759	1.65835	2.20028	1.50032	#N/A	#N/A
MD02G1019700	0.0417366	0.178028	0.285351	0.860313	1.41915	1.44484	0.957842	1.45619	1.76523	Protein SRG1 OS=Arabidopsis thaliana GN=SRG1 PE=2 SV=1	PREDICTED: protein SRG1-like [Malus domestica]
MD04G1020100	1.98131	1.56658	4.20071	25.0273	4.19438	19.7881	35.7202	17.0137	3.62322	Xyloglucan endotransglucosylase/hydrolase 2 OS=Glycine max PE=2 SV=1	PREDICTED: xyloglucan endotransglucosylase/hydrolase 2 [Malus domestica]
MD11G1313200	2.94861	1.61369	2.44523	6.54622	5.12752	8.80435	7.23513	10.47	4.01084	Probable E3 ubiquitin-protein ligase BAH1-like 1 OS=Oryza sativa subsp. indica GN=OsI_27296 PE=3 SV=1	PREDICTED: probable E3 ubiquitin-protein ligase BAH1-like 1 [Malus domestica]
MD08G1092000	338.637	284.185	507.009	1727.26	597.586	1592.48	1113.15	1259	466.736	Transcription factor MYB44 OS=Arabidopsis thaliana GN=MYB44 PE=2 SV=1	transcription factor MYB44-like [Malus domestica]
MD02G1129900	23.5279	17.9598	36.3696	88.0658	49.5328	75.7188	69.0065	79.0029	58.5295	Oligopeptide transporter 7 OS=Arabidopsis thaliana GN=OPT7 PE=2 SV=1	PREDICTED: oligopeptide transporter 7-like [Malus domestica]
MD07G1116600	38.3854	14.0342	22.8605	8.38561	6.58225	7.40811	8.44098	9.89846	10.5422	Putative lipid-binding protein At4g00165 OS=Arabidopsis thaliana GN=At4g00165 PE=2 SV=1	PREDICTED: putative lipid-binding protein At4g00165 [Malus domestica]
MD09G1186100	14.8329	16.1662	18.3019	47.4553	24.6859	48.1235	39.1848	50.5051	31.4194	Polyadenylate-binding protein-interacting protein 4 OS=Arabidopsis thaliana GN=CID4 PE=2 SV=1	PREDICTED: polyadenylate-binding protein-interacting protein 3-like [Malus domestica]
MD05G1139900	5.59696	8.66531	5.43285	2.58157	3.12238	1.98198	1.61882	2.26472	1.92618	Mitochondrial phosphate carrier protein 1, mitochondrial OS=Arabidopsis thaliana GN=MPT1 PE=2 SV=1	PREDICTED: mitochondrial phosphate carrier protein 1, mitochondrial-like [Malus domestica]
MD10G1040300	1.63468	1.39455	0.957966	5.47553	5.2658	5.65897	9.37887	3.9751	4.24257	Probable disease resistance protein RPP1 OS=Arabidopsis thaliana GN=RPP1 PE=2 SV=1	PREDICTED: TMV resistance protein N-like [Malus domestica]
MD06G1147300	0.186868	0.227739	0.234663	1.1464	0.883826	0.739317	2.57824	1.0443	0.461893	4-coumarate--CoA ligase-like 9 OS=Arabidopsis thaliana GN=4CLL9 PE=1 SV=2	PREDICTED: 4-coumarate--CoA ligase-like 9 [Malus domestica]
MD16G1082500	3.8241	1.63117	7.47006	21.5129	17.6224	17.7772	20.6606	25.4716	40.4346	--	PREDICTED: uncharacterized protein LOC103403302 [Malus domestica]
MD12G1102500	1.25993	0.975325	1.18501	5.93161	1.87899	5.10013	3.90442	3.15754	2.87075	Aspartic proteinase-like protein 2 OS=Arabidopsis thaliana GN=At1g65240 PE=1 SV=2	PREDICTED: aspartic proteinase-like protein 2 [Malus domestica]
MD00G1157200	1.83807	0.551725	2.32719	0.292346	0.182746	0.168335	0.423134	0.0719756	0.229034	WAT1-related protein At1g21890 OS=Arabidopsis thaliana GN=At1g21890 PE=2 SV=1	PREDICTED: WAT1-related protein At1g21890 [Malus domestica]
MD13G1206000	1.0171	2.83587	1.21148	4.13343	9.45624	6.91936	21.3021	3.98667	8.46528	Protein SIEVE ELEMENT OCCLUSION B OS=Arabidopsis thaliana GN=SEOB PE=1 SV=1	uncharacterized LOC103453287 [Malus domestica]
MD10G1224500	7.77675	8.38023	7.35576	3.09354	4.65132	3.36015	1.36987	4.28416	2.47866	--	PREDICTED: uncharacterized protein LOC103445968 [Malus domestica]
MD03G1182000	29.0131	27.1559	22.344	13.8674	7.39538	12.3473	14.651	15.2258	7.70483	Probable LRR receptor-like serine/threonine-protein kinase At3g47570 OS=Arabidopsis thaliana GN=At3g47570 PE=2 SV=1	PREDICTED: LRR receptor-like serine/threonine-protein kinase FLS2 [Pyrus x bretschneideri]
MD07G1301900	1.26902	2.41033	1.59026	0.226211	0.642751	0.402604	0.045792	0.151891	0.299205	Uncharacterized calcium-binding protein At1g02270 OS=Arabidopsis thaliana GN=At1g02270 PE=2 SV=2	PREDICTED: uncharacterized calcium-binding protein At1g02270-like [Malus domestica]
MD06G1053100	8.38147	3.49905	7.95402	24.3527	14.5208	24.2233	41.4376	44.1189	54.8535	Transcription repressor MYB5 OS=Arabidopsis thaliana GN=MYB5 PE=1 SV=1	PREDICTED: transcription repressor MYB5-like [Malus domestica]
MD07G1309200	2.11962	1.51256	2.23951	5.57593	3.68593	4.06113	9.82834	5.91964	5.90735	Cellulose synthase-like protein D3 OS=Arabidopsis thaliana GN=CSLD3 PE=1 SV=1	PREDICTED: cellulose synthase-like protein D3 [Malus domestica]
MD11G1109100	51.656	14.085	25.1466	8.4239	3.6568	7.92256	7.26863	10.8019	12.9634	Metallothionein-like protein type 2 OS=Actinidia deliciosa GN=pKIWI504 PE=2 SV=1	PREDICTED: metallothionein-like protein type 2 [Malus domestica]
MD01G1146800	10.28	18.677	10.7917	4.24946	6.1018	5.45158	3.11328	3.63195	3.72098	Transcription factor DIVARICATA OS=Antirrhinum majus GN=DIVARICATA PE=2 SV=1	transcription factor DIVARICATA-like [Malus domestica]
MD07G1222600	13.3384	7.46284	29.1854	79.5965	45.7647	77.9149	98.4344	88.6886	71.6832	Probable 2-oxoglutarate-dependent dioxygenase At5g05600 OS=Arabidopsis thaliana GN=At5g05600 PE=2 SV=1	PREDICTED: leucoanthocyanidin dioxygenase [Pyrus x bretschneideri]
MD16G1024300	0.452682	1.54473	1.5917	0	0	0	0	0	0.0870271	MLP-like protein 43 OS=Arabidopsis thaliana GN=MLP43 PE=1 SV=1	PREDICTED: MLP-like protein 43 [Malus domestica]
MD09G1240200	37.301	24.0206	33.7793	15.8628	7.04807	6.80569	6.06019	11.7737	10.0081	--	PREDICTED: uncharacterized protein LOC103945434 [Pyrus x bretschneideri]
MD02G1248100	0	0	0.0376493	0.099321	2.86285	1.06754	0.810924	0.122264	0.407583	Beta-D-glucosyl crocetin beta-1,6-glucosyltransferase OS=Gardenia jasminoides GN=UGT94E5 PE=1 SV=1	PREDICTED: beta-D-glucosyl crocetin beta-1,6-glucosyltransferase-like [Malus domestica]
MD01G1093500	48.612	24.7196	39.601	18.1865	9.07005	11.443	14.057	15.0934	10.3556	Protein NTM1-like 9 OS=Arabidopsis thaliana GN=NTL9 PE=1 SV=1	PREDICTED: NAC domain-containing protein 91-like [Malus domestica]
MD03G1148100	9.77274	2.34781	4.27885	0	0.452311	0.833286	0.483365	0.178145	0.701847	--	PREDICTED: uncharacterized protein LOC103405117 [Malus domestica]
novel.594	78.3836	52.6133	100.072	27.1231	39.5991	26.0529	31.2136	30.3941	47.78	#N/A	#N/A
MD10G1032000	0.382213	0.0465808	0.0799951	2.8841	0.513008	2.6463	23.6783	4.90695	3.72647	Ethylene-responsive transcription factor ABR1 OS=Arabidopsis thaliana GN=ABR1 PE=2 SV=1	ethylene-responsive transcription factor ABR1-like [Malus domestica]
MD03G1033100	4.07414	6.42995	5.57094	14.1716	13.3063	15.1113	10.5188	15.0761	10.1822	#N/A	#N/A
MD03G1059900	0.462162	0.315416	1.21877	5.63651	2.10908	3.61124	5.30324	11.2385	8.7517	Protein CHLOROPLAST IMPORT APPARATUS 2 OS=Arabidopsis thaliana GN=CIA2 PE=2 SV=1	PREDICTED: zinc finger protein CONSTANS-LIKE 7-like isoform X2 [Malus domestica]
MD03G1181900	30.4872	27.5347	19.0665	13.5599	8.62941	10.3079	15.1715	15.0477	6.35452	LRR receptor-like serine/threonine-protein kinase EFR OS=Arabidopsis thaliana GN=EFR PE=1 SV=1	PREDICTED: leucine-rich repeat receptor-like serine/threonine-protein kinase BAM1 [Malus domestica]
MD10G1181900	8.31998	9.00206	6.14419	1.74287	2.36053	0.602137	2.32855	1.71638	1.56049	LEAF RUST 10 DISEASE-RESISTANCE LOCUS RECEPTOR-LIKE PROTEIN KINASE-like 2.3 OS=Arabidopsis thaliana GN=LRK10L-2.3 PE=3 SV=2	PREDICTED: rust resistance kinase Lr10-like isoform X2 [Pyrus x bretschneideri]
MD07G1253900	26.4943	23.5573	20.9934	7.86283	14.2021	10.1868	8.11191	12.5987	11.6217	Putative glycerol-3-phosphate transporter 1 OS=Arabidopsis thaliana GN=At3g47420 PE=2 SV=1	PREDICTED: putative glycerol-3-phosphate transporter 1 [Malus domestica]
MD06G1118700	44.7234	29.6371	64.6715	107.284	145.327	103.982	152.493	218.615	272.316	Methionine gamma-lyase OS=Arabidopsis thaliana GN=MGL PE=1 SV=1	PREDICTED: methionine gamma-lyase [Malus domestica]
MD04G1207800	60.6985	47.7584	29.9878	17.0128	21.2695	11.009	4.60007	17.7515	12.6937	Guanosine nucleotide diphosphate dissociation inhibitor 2 OS=Arabidopsis thaliana GN=GDI2 PE=2 SV=1	PREDICTED: guanosine nucleotide diphosphate dissociation inhibitor 2-like isoform X3 [Malus domestica]
MD05G1198100	25.5648	12.3009	26.7608	9.23352	6.99395	7.89835	8.12169	9.54664	9.49324	Probable inorganic phosphate transporter 1-7 OS=Arabidopsis thaliana GN=PHT1-7 PE=2 SV=2	PREDICTED: probable inorganic phosphate transporter 1-7, partial [Malus domestica]
MD10G1318400	1.75198	1.72456	2.4132	4.4756	4.14028	5.86509	5.02593	3.46716	4.4045	Pentatricopeptide repeat-containing protein At1g61870, mitochondrial OS=Arabidopsis thaliana GN=PPR336 PE=2 SV=2	PREDICTED: pentatricopeptide repeat-containing protein At1g61870, mitochondrial-like [Malus domestica]
MD11G1191000	2.04099	3.17764	4.9338	21.0792	7.94435	10.5478	31.7147	22.442	21.924	Probable carboxylesterase 18 OS=Arabidopsis thaliana GN=CXE18 PE=1 SV=1	PREDICTED: probable carboxylesterase 18 [Malus domestica]
MD10G1290700	7.41314	6.89561	7.85112	23.9719	12.5873	15.9013	24.2554	27.3375	16.7414	Protein yippee-like At5g53940 OS=Arabidopsis thaliana GN=At5g53940 PE=2 SV=1	PREDICTED: protein yippee-like At5g53940 [Malus domestica]
MD02G1101400	1.13741	0.295316	0.531309	0	0	0.0733696	0.0236442	0.0784272	0.11884	Cysteine-rich receptor-like protein kinase 29 OS=Arabidopsis thaliana GN=CRK29 PE=2 SV=1	PREDICTED: cysteine-rich receptor-like protein kinase 10 isoform X1 [Pyrus x bretschneideri]
MD15G1125200	11.0371	7.5055	15.5673	31.0731	24.2483	26.594	38.5914	32.5469	30.455	EIN3-binding F-box protein 2 OS=Arabidopsis thaliana GN=EBF2 PE=1 SV=1	PREDICTED: EIN3-binding F-box protein 1-like [Pyrus x bretschneideri]
MD15G1021800	2.20156	1.66263	1.30427	4.20018	3.27789	5.28321	9.23188	5.43753	5.46403	BEL1-like homeodomain protein 3 OS=Arabidopsis thaliana GN=BLH3 PE=1 SV=1	PREDICTED: BEL1-like homeodomain protein 3 [Malus domestica]
novel.674	0.534538	0.513016	1.41399	8.149	1.25555	7.84246	6.4532	5.81634	1.52005	#N/A	#N/A
MD06G1138200	5.44712	1.60743	4.11566	12.3874	22.102	10.1654	19.2952	14.0174	19.0669	Heavy metal-associated isoprenylated plant protein 7 OS=Arabidopsis thaliana GN=HIPP07 PE=1 SV=1	PREDICTED: heavy metal-associated isoprenylated plant protein 3-like isoform X3 [Pyrus x bretschneideri]
MD02G1232700	4.76499	5.3207	5.19007	27.8119	6.65232	28.3027	26.9571	22.0243	7.05031	--	PREDICTED: uncharacterized protein LOC103407996 [Malus domestica]
MD17G1081400	2.46564	1.60454	2.73239	9.19012	5.45908	4.48665	13.9499	16.6771	17.8515	Protein STRUBBELIG-RECEPTOR FAMILY 3 OS=Arabidopsis thaliana GN=SRF3 PE=2 SV=1	PREDICTED: protein STRUBBELIG-RECEPTOR FAMILY 3 isoform X1 [Malus domestica]
MD10G1255500	19.8312	18.5839	22.7223	70.6906	29.0365	72.8834	62.6724	68.5062	46.6624	ABC transporter C family member 2 OS=Arabidopsis thaliana GN=ABCC2 PE=1 SV=2	PREDICTED: LOW QUALITY PROTEIN: ABC transporter C family member 12-like [Malus domestica]
MD00G1105700	0.246726	0	0	1.60106	1.37369	1.03036	8.25748	3.53604	13.3865	Beta-glucosidase 12 OS=Oryza sativa subsp. indica GN=BGLU12 PE=3 SV=1	beta-glucosidase 12-like precursor [Malus domestica]
MD10G1306800	1.01815	0.119217	0.955438	0.0342925	0.0714545	0.0197459	0.0572702	0.0844282	0.0191899	G-type lectin S-receptor-like serine/threonine-protein kinase At1g61420 OS=Arabidopsis thaliana GN=At1g61420 PE=3 SV=2	PREDICTED: G-type lectin S-receptor-like serine/threonine-protein kinase At1g61550 [Malus domestica]
MD09G1240100	14.0735	6.20068	10.1254	4.52652	3.21303	2.86418	4.9566	3.12285	4.53716	Protein trichome birefringence-like 39 OS=Arabidopsis thaliana GN=TBL39 PE=2 SV=1	PREDICTED: protein trichome birefringence-like 39 [Malus domestica]
MD08G1125400	4.9312	3.94531	5.70151	2.25499	1.15678	2.25415	1.21071	1.85999	1.66543	Probable nucleoredoxin 3 OS=Arabidopsis thaliana GN=At4g31240 PE=2 SV=1	hypothetical protein CICLE_v10010213mg [Citrus clementina]
MD07G1178600	2.28814	4.19109	3.61519	7.16727	9.9361	8.58676	6.24225	9.8902	8.92719	Mitochondrial import inner membrane translocase subunit TIM14-1 OS=Arabidopsis thaliana GN=TIM14-1 PE=1 SV=1	PREDICTED: mitochondrial import inner membrane translocase subunit TIM14-1-like [Pyrus x bretschneideri]
MD17G1218100	0.125879	0.134235	0.245895	1.5136	0.563187	1.08943	2.01621	2.0296	0.968002	Putative UPF0481 protein At3g02645 OS=Arabidopsis thaliana GN=At3g02645 PE=3 SV=1	PREDICTED: putative UPF0481 protein At3g02645 [Malus domestica]
MD08G1087900	9.55909	7.66713	7.2592	18.286	14.3241	31.7799	32.102	14.6521	10.6834	Subtilisin-like protease SBT1.7 OS=Arabidopsis thaliana GN=SBT1.7 PE=1 SV=1	PREDICTED: subtilisin-like protease SBT1.7 [Malus domestica]
MD03G1036600	526.153	355.061	595.677	266.751	157.436	208.189	151.422	200.848	178.397	Heat shock cognate protein 80 OS=Solanum lycopersicum GN=HSC80 PE=2 SV=1	PREDICTED: heat shock protein 90-2 [Pyrus x bretschneideri]
MD10G1128700	4.38606	4.80074	5.09219	11.5144	8.81198	9.82236	14.8772	13.6493	9.94353	TMV resistance protein N OS=Nicotiana glutinosa GN=N PE=1 SV=1	PREDICTED: TMV resistance protein N-like [Malus domestica]
MD07G1265700	2.33664	2.99008	6.71985	24.6956	10.0476	14.3162	28.6125	18.4598	19.5283	Dof zinc finger protein PBF OS=Zea mays GN=PBF PE=1 SV=1	PREDICTED: dof zinc finger protein DOF1.1-like [Malus domestica]
MD14G1006700	6.19201	10.0743	7.14934	2.88699	3.95759	3.74029	2.98166	2.10427	3.29486	Probable inactive leucine-rich repeat receptor-like protein kinase At3g03770 OS=Arabidopsis thaliana GN=At3g03770 PE=2 SV=1	PREDICTED: probable inactive leucine-rich repeat receptor-like protein kinase At3g03770 isoform X1 [Malus domestica]
MD15G1243000	21.2706	18.282	13.1922	7.49016	9.18343	5.41742	1.93227	5.67841	3.47584	L-ascorbate peroxidase 3, peroxisomal OS=Arabidopsis thaliana GN=APX3 PE=1 SV=1	PREDICTED: L-ascorbate peroxidase 3, peroxisomal-like [Malus domestica]
MD06G1230900	31.5212	10.2139	13.6097	4.41528	6.17369	2.47545	2.58727	8.00979	5.4617	Ras-related protein RABA6a OS=Arabidopsis thaliana GN=RABA6A PE=2 SV=1	PREDICTED: ras-related protein RABA6a-like [Malus domestica]
MD13G1200600	1291.94	1028.35	1211.49	452.28	99.126	347.447	263.012	255.633	233.932	Early light-induced protein 1, chloroplastic OS=Arabidopsis thaliana GN=ELIP1 PE=1 SV=1	PREDICTED: early light-induced protein 1, chloroplastic-like [Pyrus x bretschneideri]
MD17G1099500	2.14912	0.774107	3.40514	5.98864	9.70065	11.8093	11.143	12.3708	19.9236	Cellulose synthase-like protein B3 OS=Arabidopsis thaliana GN=CSLB3 PE=2 SV=1	PREDICTED: cellulose synthase-like protein H1 [Malus domestica]
MD06G1028200	38.8112	39.6281	40.7057	194.708	53.2968	167.205	140.646	105.293	35.7211	#N/A	#N/A
MD03G1051000	0.489434	0.328064	0.717052	2.70232	1.12615	3.42324	3.07553	2.84605	2.85639	Trans-cinnamate 4-monooxygenase OS=Catharanthus roseus GN=CYP73A4 PE=2 SV=1	PREDICTED: trans-cinnamate 4-monooxygenase-like isoform X2 [Pyrus x bretschneideri]
MD16G1151400	26.9253	22.6949	45.4312	81.1463	74.6589	68.5721	108.153	117.449	131.423	Transcription factor bHLH147 OS=Arabidopsis thaliana GN=BHLH147 PE=1 SV=1	PREDICTED: transcription factor bHLH147-like [Malus domestica]
MD11G1121200	7.23683	9.89891	13.0583	23.8928	18.7681	22.8324	40.3478	39.2939	38.1065	Ethylene-responsive transcription factor RAP2-7 OS=Arabidopsis thaliana GN=RAP2-7 PE=2 SV=2	PREDICTED: ethylene-responsive transcription factor RAP2-7-like isoform X1 [Pyrus x bretschneideri]
MD17G1077800	2.4049	4.91435	2.07576	7.56549	13.1867	8.76786	6.3909	8.78095	10.1607	--	PREDICTED: uncharacterized protein LOC103404720 isoform X1 [Malus domestica]
MD17G1099600	3.64894	1.29448	5.75171	9.49498	16.9396	19.6536	16.0298	17.4561	30.9772	Cellulose synthase-like protein H1 OS=Oryza sativa subsp. japonica GN=CSLH1 PE=2 SV=2	PREDICTED: cellulose synthase-like protein H1 [Malus domestica]
MD02G1037500	69.2637	88.0062	139.904	418.945	168.6	336.638	306.356	411.178	182.032	GTP-binding nuclear protein Ran-3 OS=Arabidopsis thaliana GN=RAN3 PE=1 SV=2	PREDICTED: GTP-binding nuclear protein Ran-3 [Malus domestica]
MD08G1092600	2.03082	19.2307	9.40188	0.90699	0.654187	2.28987	0.0776778	0.257655	0	Probable isoaspartyl peptidase/L-asparaginase 2 OS=Arabidopsis thaliana GN=At3g16150 PE=2 SV=2	PREDICTED: LOW QUALITY PROTEIN: probable isoaspartyl peptidase/L-asparaginase 2 [Malus domestica]
MD00G1020300	1.66061	0.885415	2.19896	5.23871	3.67193	4.50105	5.71045	3.1569	2.87016	Protein SUPPRESSOR OF npr1-1, CONSTITUTIVE 1 OS=Arabidopsis thaliana GN=SNC1 PE=1 SV=5	PREDICTED: protein SUPPRESSOR OF npr1-1, CONSTITUTIVE 1-like, partial [Pyrus x bretschneideri]
MD07G1268800	1.28515	0.631239	2.13006	5.23458	4.19909	4.12154	31.0765	5.64088	7.281	Low-temperature-induced 65 kDa protein OS=Arabidopsis thaliana GN=LTI65 PE=2 SV=2	PREDICTED: low-temperature-induced 65 kDa protein isoform X1 [Malus domestica]
MD07G1063300	8.44252	7.49195	11.2524	23.6582	15.0278	19.7902	35.2573	29.0754	20.0815	Calcium-dependent protein kinase 1 OS=Arabidopsis thaliana GN=CPK1 PE=1 SV=1	PREDICTED: calcium-dependent protein kinase 1-like isoform X1 [Malus domestica]
MD02G1066400	1.6226	0.947904	1.41254	0.393844	0.362977	0.575669	0.455358	0.316999	0.15258	Receptor-like protein kinase HSL1 OS=Arabidopsis thaliana GN=HSL1 PE=2 SV=1	PREDICTED: receptor-like protein kinase HSL1 [Malus domestica]
MD03G1032700	10.8008	14.1283	9.58917	19.1125	29.4744	22.9372	21.6398	21.9444	26.2135	Mediator of RNA polymerase II transcription subunit 15a OS=Arabidopsis thaliana GN=MED15A PE=1 SV=1	PREDICTED: mediator of RNA polymerase II transcription subunit 15a-like isoform X1 [Pyrus x bretschneideri]
MD12G1034100	6.75591	7.53057	16.403	60.5426	18.6489	43.7495	61.799	44.0699	20.3092	Probable CCR4-associated factor 1 homolog 9 OS=Arabidopsis thaliana GN=CAF1-9 PE=2 SV=1	PREDICTED: probable CCR4-associated factor 1 homolog 11 [Malus domestica]
MD14G1159800	1.12093	0.159377	0.456174	3.7707	2.67469	4.52718	3.84087	8.78965	4.57929	--	PREDICTED: uncharacterized protein LOC108175116 [Malus domestica]
MD03G1274200	1.31607	2.05379	2.06921	4.82459	3.47543	4.76235	4.29723	4.2422	3.05465	Protein SLOW WALKER 1 OS=Arabidopsis thaliana GN=SWA1 PE=2 SV=1	PREDICTED: LOW QUALITY PROTEIN: protein SLOW WALKER 1 [Malus domestica]
MD16G1024000	20.6674	28.5834	35.7613	13.7456	10.5602	14.1784	4.40399	9.92121	9.96082	MLP-like protein 31 OS=Arabidopsis thaliana GN=MLP31 PE=2 SV=2	PREDICTED: MLP-like protein 28 [Malus domestica]
MD15G1117000	2.80357	1.4408	1.61657	0.638239	0.574268	0.367503	0.581394	0.321411	0.681842	Transcriptional corepressor LEUNIG OS=Arabidopsis thaliana GN=LUG PE=1 SV=2	PREDICTED: transcriptional corepressor LEUNIG-like [Pyrus x bretschneideri]
MD09G1249600	3.57933	1.23911	2.07731	0.668301	0.301713	0.615701	0.446438	0.932369	0.922479	UPF0481 protein At3g47200 OS=Arabidopsis thaliana GN=At3g47200 PE=2 SV=1	PREDICTED: UPF0481 protein At3g47200-like [Malus domestica]
MD05G1247200	4.15254	1.73906	2.39662	0.648454	0.472908	0.970801	0.21659	0.199562	0.435446	Zinc transporter 1 OS=Arabidopsis thaliana GN=ZIP1 PE=2 SV=1	PREDICTED: zinc transporter 1-like [Malus domestica]
MD14G1015900	5.20671	4.66393	11.6965	72.7924	8.77441	54.3314	26.4985	51.3179	13.6244	Heat stress transcription factor A-3 OS=Arabidopsis thaliana GN=HSFA3 PE=2 SV=2	PREDICTED: heat stress transcription factor A-3-like [Malus domestica]
MD15G1343900	104.008	38.501	73.1113	205.369	178.127	207.158	291.946	262.27	390.159	Amino acid permease 3 OS=Arabidopsis thaliana GN=AAP3 PE=1 SV=2	PREDICTED: amino acid permease 3-like [Pyrus x bretschneideri]
MD06G1072200	83.0983	95.6252	98.8522	49.7373	29.4158	17.6878	12.807	29.3663	55.1535	Dehydration-responsive element-binding protein 1F OS=Arabidopsis thaliana GN=DREB1F PE=2 SV=1	PREDICTED: dehydration-responsive element-binding protein 1E-like [Malus domestica]
MD10G1029100	0	0.095123	0	0.383066	4.58956	3.1983	1.17285	0.353665	1.50053	--	uncharacterized protein LOC109803890 [Cajanus cajan]
MD05G1340800	4.34853	12.6073	10.1536	25.0642	22.7081	42.7421	33.6232	39.8337	24.0676	--	PREDICTED: uncharacterized protein LOC103955487 [Pyrus x bretschneideri]
MD11G1304000	18.3731	10.7413	14.8707	7.52273	6.91901	6.39595	5.49645	3.83442	6.6763	Heavy metal-associated isoprenylated plant protein 36 OS=Arabidopsis thaliana GN=HIPP36 PE=2 SV=1	PREDICTED: nuA4 complex subunit EAF3 homolog [Pyrus x bretschneideri]
MD05G1223400	6.93573	8.49878	6.65102	27.4017	11.7352	27.9391	15.5555	16.3991	16.7279	Auxin-responsive protein SAUR72 OS=Arabidopsis thaliana GN=SAUR72 PE=2 SV=1	PREDICTED: auxin-responsive protein SAUR71-like [Malus domestica]
MD12G1107700	19.0089	17.0211	24.1644	62.3137	30.5777	57.9115	56.2655	77.1685	55.1651	E3 ubiquitin-protein ligase MIEL1 OS=Arabidopsis thaliana GN=MIEL1 PE=1 SV=1	PREDICTED: E3 ubiquitin-protein ligase MIEL1-like [Malus domestica]
MD01G1187600	12.7084	15.0303	23.2733	55.5977	29.0103	49.172	52.959	62.7151	47.2322	Xyloglucan galactosyltransferase XLT2 OS=Arabidopsis thaliana GN=XLT2 PE=1 SV=1	PREDICTED: xyloglucan galactosyltransferase XLT2 [Malus domestica]
MD01G1177000	0.316202	0.0449586	0.720619	5.61258	0.990284	5.1604	9.27248	4.2346	1.06381	Ethylene-responsive transcription factor 2 OS=Nicotiana tabacum GN=ERF2 PE=2 SV=1	ethylene-responsive transcription factor 2-like [Malus domestica]
MD09G1120500	0.408199	0.0870586	0.199345	1.75295	1.18709	1.31217	1.12221	1.07894	1.12808	Putative MO25-like protein At5g47540 OS=Arabidopsis thaliana GN=At5g47540 PE=2 SV=1	PREDICTED: putative MO25-like protein At5g47540 [Malus domestica]
MD11G1275800	71.3278	49.783	91.7997	197.624	134.233	149.239	239.08	224.31	160.487	C2 domain-containing protein At1g53590 OS=Arabidopsis thaliana GN=NTMC2T6.1 PE=1 SV=2	PREDICTED: C2 domain-containing protein At1g53590 [Malus domestica]
MD12G1002300	3.40577	8.03006	10.3198	34.0419	14.5176	30.7419	49.7227	46.5838	25.5199	Glucan endo-1,3-beta-glucosidase 8 OS=Arabidopsis thaliana GN=At1g64760 PE=1 SV=2	PREDICTED: glucan endo-1,3-beta-glucosidase 8 [Malus domestica]
MD07G1097000	1.54741	3.60027	5.90809	22.7143	7.74135	21.01	27.1726	23.2763	11.0205	--	PREDICTED: trihelix transcription factor ASIL2-like [Malus domestica]
MD02G1163000	160.101	57.2533	170.037	52.7619	31.8144	28.0917	43.8059	60.7793	36.9572	Methylesterase 1 OS=Arabidopsis thaliana GN=MES1 PE=1 SV=1	PREDICTED: salicylic acid-binding protein 2-like [Malus domestica]
MD15G1030200	1.73791	1.8623	1.42832	0.782725	0.663756	0.419255	0.607994	0.582602	0.48894	--	PREDICTED: clumping factor A-like [Malus domestica]
MD07G1286900	61.5978	51.1199	63.7292	21.73	35.4769	16.8672	10.5564	20.4369	18.7045	Uncharacterized protein At4g00950 OS=Arabidopsis thaliana GN=At4g00950 PE=2 SV=1	PREDICTED: uncharacterized protein At4g00950-like [Malus domestica]
MD10G1069900	70.8391	59.6798	146.353	521.039	156.394	409.047	408.86	522.055	229.099	bZIP transcription factor 44 OS=Arabidopsis thaliana GN=BZIP44 PE=1 SV=1	PREDICTED: bZIP transcription factor 53-like [Malus domestica]
MD02G1253800	6.48416	1.0309	3.77109	0.810044	0.71207	0.378974	0.817324	1.05949	1.41655	Rust resistance kinase Lr10 OS=Triticum aestivum GN=LRK10 PE=2 SV=1	PREDICTED: rust resistance kinase Lr10-like [Malus domestica]
MD17G1014500	6.12394	2.93949	5.30528	27.8362	8.57637	15.1949	34.445	27.9667	20.104	--	PREDICTED: uncharacterized protein LOC103404206 [Malus domestica]
novel.435	1.21686	0.0519051	0.415981	0	0	0	0	0	0	#N/A	#N/A
MD16G1061700	21.901	31.487	22.6266	11.0538	15.1077	11.7804	8.71911	10.2861	14.4261	PLASMODESMATA CALLOSE-BINDING PROTEIN 3 OS=Arabidopsis thaliana GN=PDCB3 PE=1 SV=1	PREDICTED: PLASMODESMATA CALLOSE-BINDING PROTEIN 4 [Malus domestica]
MD08G1208300	6.20064	8.04485	6.05621	15.0669	10.5419	17.019	28.1394	23.9558	17.4587	Protein SABRE OS=Arabidopsis thaliana GN=SAB PE=1 SV=1	PREDICTED: protein SABRE isoform X2 [Malus domestica]
MD02G1084600	1.06472	3.21079	1.88637	7.88987	4.69712	8.03299	8.95005	5.83793	5.40288	Protein phosphatase 2C 7 OS=Arabidopsis thaliana GN=HAB2 PE=1 SV=2	PREDICTED: protein phosphatase 2C 77-like [Malus domestica]
MD08G1218800	2.50189	4.84754	2.85779	0.98335	0.607106	1.34215	0.851532	0.89667	0.407613	Transcription factor bHLH80 OS=Arabidopsis thaliana GN=BHLH80 PE=2 SV=1	PREDICTED: transcription factor bHLH80 isoform X2 [Pyrus x bretschneideri]
MD13G1018300	2.53049	2.20897	2.52903	0.555977	0.842528	0.873098	0.619006	1.18216	0.565676	--	PREDICTED: transcription initiation factor TFIID subunit 11-like [Malus domestica]
MD03G1111100	0.6593	0.187483	0	3.77502	2.94972	6.08633	3.36238	4.87941	6.5487	#N/A	#N/A
MD12G1000700	0.683404	1.06885	0.985336	2.19409	1.73262	2.38191	2.1472	2.13322	1.57972	Pentatricopeptide repeat-containing protein At5g15010, mitochondrial OS=Arabidopsis thaliana GN=At5g15010 PE=2 SV=2	PREDICTED: pentatricopeptide repeat-containing protein At5g15010, mitochondrial [Pyrus x bretschneideri]
MD13G1071600	0	0	0	0.621827	0.398672	0.661021	4.15392	0.942116	0.588875	Extracellular ribonuclease LE OS=Solanum lycopersicum PE=1 SV=2	PREDICTED: extracellular ribonuclease LE [Malus domestica]
MD06G1115000	0.163468	0.488092	1.43695	3.08876	4.82698	4.93139	9.6915	6.91321	10.9993	Probable serine/threonine-protein kinase WNK4 OS=Oryza sativa subsp. japonica GN=WNK4 PE=2 SV=1	PREDICTED: LOW QUALITY PROTEIN: serine/threonine-protein kinase WNK8-like [Malus domestica]
MD09G1078900	0.962978	0.410758	0.78379	2.61907	6.7498	4.44486	4.60417	1.52719	3.08551	--	PREDICTED: protein GLUTAMINE DUMPER 1-like [Malus domestica]
MD05G1341000	3.76703	3.46086	5.37742	2.12927	1.55573	1.59228	2.12436	1.22547	1.88788	Gibberellin 2-beta-dioxygenase 8 OS=Arabidopsis thaliana GN=GA2OX8 PE=1 SV=2	PREDICTED: gibberellin 2-beta-dioxygenase 8 [Malus domestica]
novel.438	4.15122	0.610587	3.91471	0.122943	0	0	0.136881	0	0	#N/A	#N/A
MD17G1140800	3.9784	1.40981	2.47093	0.89366	0.730234	0.74664	0.877914	0.841249	1.17668	Trifunctional UDP-glucose 4,6-dehydratase/UDP-4-keto-6-deoxy-D-glucose 3,5-epimerase/UDP-4-keto-L-rhamnose-reductase RHM1 OS=Arabidopsis thaliana GN=RHM1 PE=1 SV=1	PREDICTED: trifunctional UDP-glucose 4,6-dehydratase/UDP-4-keto-6-deoxy-D-glucose 3,5-epimerase/UDP-4-keto-L-rhamnose-reductase RHM1-like [Malus domestica]
MD16G1017400	3.53865	0.890801	1.58647	0.348766	0.103816	0	0.388304	0.551997	0.50186	#N/A	#N/A
MD04G1055700	3.45767	2.86704	4.48181	1.74851	1.5036	1.21456	1.29782	1.50328	1.89479	Glutamate dehydrogenase 2 OS=Arabidopsis thaliana GN=GDH2 PE=1 SV=1	PREDICTED: glutamate dehydrogenase 2-like [Prunus mume]
MD14G1043300	12.0295	2.16049	9.91792	2.17511	1.59063	0.891162	0.768421	3.34695	2.17688	Calcium-dependent protein kinase 1 OS=Arabidopsis thaliana GN=CPK1 PE=1 SV=1	PREDICTED: calcium-dependent protein kinase 26-like [Malus domestica]
MD08G1211700	4.93416	6.95878	10.892	50.4372	8.95781	59.0999	34.2003	41.2213	6.4701	--	PREDICTED: uncharacterized protein LOC103928190 [Pyrus x bretschneideri]
MD16G1275100	0.273715	0	0.668348	7.64028	1.59199	3.92556	9.02989	10.9968	3.68347	--	PREDICTED: uncharacterized protein LOC103440243 [Malus domestica]
MD11G1174700	496.315	345.995	632.377	271.862	161.86	193.233	195.934	254.057	189.947	DnaJ protein homolog OS=Cucumis sativus GN=DNAJ1 PE=2 SV=1	PREDICTED: dnaJ protein homolog [Malus domestica]
MD13G1100800	1.68995	2.19322	1.28184	0.463228	0.723913	0.729064	0.653274	0.893367	0.76038	BTB/POZ domain-containing protein At1g67900 OS=Arabidopsis thaliana GN=At1g67900 PE=1 SV=1	PREDICTED: BTB/POZ domain-containing protein At1g67900-like [Malus domestica]
MD17G1137400	4.84806	2.95738	5.38856	20.1402	6.78697	15.1589	13.376	18.3534	13.5295	Callose synthase 7 OS=Arabidopsis thaliana GN=CALS7 PE=3 SV=3	PREDICTED: callose synthase 7-like [Pyrus x bretschneideri]
MD05G1300100	45.0021	27.5284	41.6622	139.954	54.3276	173.82	222.776	237.869	217.455	Oryzain alpha chain OS=Oryza sativa subsp. japonica GN=Os04g0650000 PE=1 SV=2	PREDICTED: low-temperature-induced cysteine proteinase-like [Malus domestica]
MD12G1150100	0.795568	0.399235	0.639913	4.42129	0.879378	3.2517	3.56882	3.14187	1.40576	NADPH-dependent aldo-keto reductase, chloroplastic OS=Arabidopsis thaliana GN=AKR4C9 PE=1 SV=1	hypothetical protein VITISV_025518 [Vitis vinifera]
MD06G1118000	2.60672	1.31406	1.273	0.305296	0.657341	0.4219	0.679811	0.551201	0.660589	Metal-nicotianamine transporter YSL1 OS=Arabidopsis thaliana GN=YSL1 PE=2 SV=2	PREDICTED: metal-nicotianamine transporter YSL1-like [Malus domestica]
MD04G1168000	0.759966	0.897684	1.54163	0	0	0.115642	0	0.0618069	0.112386	--	PREDICTED: uncharacterized protein LOC103433721 isoform X2 [Malus domestica]
MD03G1067300	1.19906	2.61114	1.35605	8.26581	2.79525	8.67637	13.3517	6.88912	5.14113	Putative disease resistance protein RGA4 OS=Solanum bulbocastanum GN=RGA4 PE=2 SV=1	PREDICTED: putative disease resistance protein RGA3, partial [Pyrus x bretschneideri]
MD00G1073400	11.8735	22.8762	12.1181	1.60415	5.29233	5.41013	1.9561	1.88067	2.09457	Protein MARD1 OS=Arabidopsis thaliana GN=MARD1 PE=2 SV=2	PREDICTED: uncharacterized protein LOC103416102 [Malus domestica]
MD06G1012200	10.6852	7.44023	8.12338	4.76221	2.48073	2.74212	3.42426	3.66393	3.49769	Glutathione S-transferase F13 OS=Arabidopsis thaliana GN=GSTF13 PE=3 SV=1	PREDICTED: glutathione S-transferase F13-like [Malus domestica]
MD00G1061900	10.5734	8.02709	7.01105	3.33253	4.07955	3.16618	1.39137	3.28188	1.39865	Em-like protein GEA1 OS=Arabidopsis thaliana GN=EM1 PE=2 SV=1	PREDICTED: em-like protein GEA1 [Malus domestica]
MD10G1126100	1.53221	0.458168	3.79529	15.8052	6.27561	11.1552	12.2499	31.347	10.9626	--	PREDICTED: uncharacterized protein LOC108174407 [Malus domestica]
novel.517	0.261301	0.737338	0.628222	1.82992	1.40288	2.0676	1.99893	2.44389	1.08198	#N/A	#N/A
MD06G1134600	0.529638	0.346944	0.351026	0.00812304	0.110018	0.00935463	0.099483	0.0899952	0.109095	--	PREDICTED: uncharacterized protein LOC103934196 [Pyrus x bretschneideri]
MD01G1108100	0.915856	0.831189	0.685168	1.58994	2.0575	1.75391	2.01242	1.50397	2.15407	Auxin response factor 18 OS=Oryza sativa subsp. japonica GN=ARF18 PE=2 SV=1	PREDICTED: auxin response factor 18-like isoform X1 [Pyrus x bretschneideri]
MD12G1026300	1.15914	0.405687	0.812819	0.127635	0.0797848	0.146986	0.170525	0.282813	0.114278	Heat shock cognate 70 kDa protein OS=Petunia hybrida GN=HSP70 PE=2 SV=1	PREDICTED: heat shock cognate 70 kDa protein-like isoform X1 [Malus domestica]
MD15G1145500	1.13774	1.50611	1.34115	7.24455	1.93079	7.1012	6.03999	9.04248	2.63982	F-box/kelch-repeat protein At3g06240 OS=Arabidopsis thaliana GN=At3g06240 PE=2 SV=1	PREDICTED: F-box/kelch-repeat protein At3g23880-like [Malus domestica]
MD05G1362700	6.37553	3.31989	4.96006	16.5695	8.69309	12.803	29.0838	24.599	15.4139	C2 and GRAM domain-containing protein At1g03370 OS=Arabidopsis thaliana GN=At1g03370 PE=2 SV=4	PREDICTED: C2 and GRAM domain-containing protein At1g03370-like [Malus domestica]
MD10G1153700	24.3428	18.0507	16.1636	7.51979	11.4548	6.16691	5.80351	6.34656	11.604	Cytochrome b561 and DOMON domain-containing protein At4g12980 OS=Arabidopsis thaliana GN=At4g12980 PE=2 SV=1	PREDICTED: cytochrome b561 and DOMON domain-containing protein At4g12980-like [Malus domestica]
MD14G1195900	3.38581	2.97096	1.98417	5.60824	6.14584	7.51104	15.7719	4.19338	5.30031	Probable aldehyde dehydrogenase OS=Linum usitatissimum GN=FIS1 PE=2 SV=1	hypothetical protein TanjilG_26346 [Lupinus angustifolius]
MD13G1196000	0.029149	0.298404	0.0854103	1.87764	0.39124	2.21999	5.93703	3.32839	1.23284	#N/A	#N/A
MD17G1178700	26.5546	10.281	46.5754	137.431	75.0578	108.019	161.753	166.871	118.539	IAA-amino acid hydrolase ILR1-like 4 OS=Arabidopsis thaliana GN=ILL4 PE=1 SV=2	PREDICTED: IAA-amino acid hydrolase ILR1-like 4 [Pyrus x bretschneideri]
MD14G1041000	63.5063	31.1359	75.119	25.655	11.7694	18.273	3.50441	32.3243	9.65135	Syntaxin-121 OS=Arabidopsis thaliana GN=SYP121 PE=1 SV=1	PREDICTED: syntaxin-121-like [Malus domestica]
MD15G1341400	0.264378	0.375902	0.473404	1.55162	1.18283	1.52538	3.0337	1.67712	1.39772	--	PREDICTED: uncharacterized protein LOC103942419 [Pyrus x bretschneideri]
MD16G1071900	5.8645	6.82702	10.5608	0.839475	3.3344	1.63139	1.75245	1.80844	1.46802	E3 ubiquitin-protein ligase RDUF2 OS=Arabidopsis thaliana GN=DURF2 PE=1 SV=1	PREDICTED: E3 ubiquitin-protein ligase RDUF1-like [Malus domestica]
MD09G1162900	1.69172	0.444063	5.46535	34.4241	7.627	19.3068	67.3205	88.6734	51.2236	23 kDa jasmonate-induced protein OS=Hordeum vulgare PE=2 SV=1	PREDICTED: 23 kDa jasmonate-induced protein-like [Malus domestica]
MD10G1138300	0.146424	0.10707	0.224736	0.592867	0.879713	0.558617	0.840098	0.46443	0.522782	Protein DETOXIFICATION 45, chloroplastic OS=Arabidopsis thaliana GN=DTX45 PE=2 SV=2	PREDICTED: protein DETOXIFICATION 45, chloroplastic-like [Pyrus x bretschneideri]
MD13G1034900	15.015	17.313	20.8864	45.6862	25.7071	50.9859	67.9668	53.004	36.3124	--	PREDICTED: hormone receptor 4-like [Malus domestica]
MD11G1190800	150.548	152.881	200.224	456.479	239.038	467.849	354.174	462.742	336.186	Cinnamoyl-CoA reductase 1 OS=Arabidopsis thaliana GN=CCR1 PE=1 SV=1	cinnamoyl-CoA reductase 1-like [Malus domestica]
MD15G1282600	28.4239	65.5913	63.3694	19.7119	15.0865	23.2244	12.8303	10.6394	10.3519	Calmodulin-like protein 1 OS=Arabidopsis thaliana GN=CML1 PE=2 SV=1	PREDICTED: calmodulin-like protein 1 [Malus domestica]
MD14G1228000	3.19141	1.62197	2.45387	0.699831	0.486074	0.134323	0.519445	0.287164	0.913785	--	PREDICTED: uncharacterized protein LOC103950681 [Pyrus x bretschneideri]
MD10G1321000	15.3875	13.5897	23.3271	43.3155	30.9545	36.3394	53.8437	49.2363	49.3471	Calcium-dependent protein kinase 21 OS=Arabidopsis thaliana GN=CPK21 PE=1 SV=1	PREDICTED: calcium-dependent protein kinase 2-like [Pyrus x bretschneideri]
MD05G1303900	0.217958	0.18594	0.993446	0	0	0	0.0347366	0.0384067	0	GDSL esterase/lipase At1g28600 OS=Arabidopsis thaliana GN=At1g28600 PE=2 SV=1	PREDICTED: GDSL esterase/lipase At1g28610-like isoform X2 [Pyrus x bretschneideri]
novel.297	138.546	50.9748	140.434	29.4372	48.2071	21.9452	20.86	50.3295	35.9102	#N/A	#N/A
MD15G1171800	2.47148	2.23492	3.95882	6.34681	5.59506	7.84689	9.7605	7.76067	4.84639	EIN3-binding F-box protein 1 OS=Arabidopsis thaliana GN=EBF1 PE=1 SV=1	PREDICTED: EIN3-binding F-box protein 1-like [Malus domestica]
MD08G1150200	9.18039	5.63287	12.8463	21.486	21.8794	21.1639	31.4511	29.6971	28.8495	EIN3-binding F-box protein 1 OS=Arabidopsis thaliana GN=EBF1 PE=1 SV=1	EIN3-binding F-box protein 1-like [Malus domestica]
MD04G1245500	3.45021	2.2979	1.89185	0.441893	1.13741	0.658566	0.434108	0.703962	0.378195	Cytochrome P450 71D8 OS=Glycine max GN=CYP71D8 PE=2 SV=1	PREDICTED: cytochrome P450 71D8-like [Malus domestica]
MD06G1135700	2.0861	3.50987	2.3205	0.696769	0.777771	0.974355	1.32987	0.918988	0.724115	NAC domain-containing protein 83 OS=Arabidopsis thaliana GN=NAC083 PE=1 SV=1	PREDICTED: NAC domain-containing protein 83-like [Malus domestica]
MD17G1098100	24.0278	17.4359	40.3538	117.089	45.1635	100.714	129.312	92.4764	61.755	Aquaporin SIP1-1 OS=Oryza sativa subsp. japonica GN=SIP1-1 PE=2 SV=2	PREDICTED: aquaporin SIP1-1-like [Malus domestica]
MD12G1087400	6.59477	5.32189	9.52113	21.2549	11.6671	18.6192	20.8982	20.526	12.0457	Triacylglycerol lipase SDP1 OS=Arabidopsis thaliana GN=SDP1 PE=1 SV=1	PREDICTED: triacylglycerol lipase SDP1 [Malus domestica]
MD09G1162700	3.10848	0.35698	3.26963	26.2871	6.90022	12.5939	103.235	56.8186	47.5207	23 kDa jasmonate-induced protein OS=Hordeum vulgare PE=2 SV=1	PREDICTED: 23 kDa jasmonate-induced protein-like [Malus domestica]
MD12G1179100	1.58705	0.876059	1.09417	0.213815	0.250605	0.430906	0.35708	0.394809	0.448686	Protein trichome birefringence-like 35 OS=Arabidopsis thaliana GN=TBL35 PE=2 SV=1	PREDICTED: protein trichome birefringence-like 35 [Pyrus x bretschneideri]
MD10G1258000	2.46517	0.934683	1.89702	7.31418	3.81009	5.24598	13.0008	5.73923	8.64073	--	PREDICTED: uncharacterized protein LOC103435025 [Malus domestica]
MD08G1240600	0.554331	0.558881	1.67348	6.75194	2.3899	4.13704	7.37281	10.1232	7.70203	Probable aldo-keto reductase 1 OS=Glycine max GN=AKR1 PE=2 SV=1	PREDICTED: probable aldo-keto reductase 1 [Malus domestica]
MD13G1030000	19.3474	10.5251	25.6216	146.555	21.8562	105.943	181.7	164.565	57.2298	Protein TIFY 6B OS=Arabidopsis thaliana GN=TIFY6B PE=1 SV=1	PREDICTED: protein TIFY 6B-like [Malus domestica]
MD06G1184300	1.24967	0.407623	0.861571	0.126271	0.0986652	0	0.246025	0.116579	0.211981	Coatomer subunit beta&apos;-1 OS=Arabidopsis thaliana GN=At1g79990 PE=2 SV=2	PREDICTED: coatomer subunit beta&apos;-1-like [Malus domestica]
MD02G1157500	4.33037	0.473621	10.628	355.234	18.0826	239.635	279.667	154.726	60.1965	--	PREDICTED: uncharacterized protein LOC103967612 [Pyrus x bretschneideri]
MD08G1134900	4.1886	3.73786	3.25668	2.05908	1.70138	1.17201	1.02767	1.95203	1.77473	Protein MARD1 OS=Arabidopsis thaliana GN=MARD1 PE=2 SV=2	PREDICTED: uncharacterized protein LOC103441384 [Malus domestica]
MD15G1394300	0.558761	0.621127	0.727662	1.29429	1.45449	1.37329	2.31533	0.984602	2.36	Receptor-like protein kinase HSL1 OS=Arabidopsis thaliana GN=HSL1 PE=2 SV=1	PREDICTED: receptor-like protein kinase HSL1 [Malus domestica]
MD03G1132200	12.2737	7.34088	8.07876	2.29164	4.71534	2.04529	3.18929	2.75048	5.45016	--	PREDICTED: uncharacterized protein LOC103423924 [Malus domestica]
MD12G1246300	14.7703	53.1872	42.1333	110.442	106.186	126.591	203.523	161.222	178.112	Phosphoenolpyruvate carboxylase kinase 2 OS=Arabidopsis thaliana GN=PPCK2 PE=1 SV=2	PREDICTED: phosphoenolpyruvate carboxylase kinase 2 [Malus domestica]
MD15G1095300	1.57839	1.49614	2.62648	4.21753	6.01556	4.68351	17.7764	4.20287	10.3395	Bark storage protein A OS=Populus deltoides GN=BSPA PE=2 SV=1	PREDICTED: 5&apos;-methylthioadenosine/S-adenosylhomocysteine nucleosidase-like [Malus domestica]
MD15G1037300	25.9868	10.5215	35.3172	89.3802	61.9723	68.5024	95.0077	110.566	107.793	--	PREDICTED: acidic mammalian chitinase-like [Malus domestica]
MD05G1256200	4.56423	2.68443	7.014	33.2739	5.64525	31.4007	43.4363	28.2126	6.15423	Putative E3 ubiquitin-protein ligase LIN-1 OS=Lotus japonicus GN=CERBERUS PE=2 SV=2	PREDICTED: putative E3 ubiquitin-protein ligase LIN-1 [Malus domestica]
MD05G1074200	1.0887	0.52714	1.00586	4.27092	1.79037	2.79391	3.85472	5.69303	5.45878	Probable 2-oxoglutarate-dependent dioxygenase At5g05600 OS=Arabidopsis thaliana GN=At5g05600 PE=2 SV=1	PREDICTED: protein DMR6-LIKE OXYGENASE 2-like [Malus domestica]
MD02G1090000	1.0528	0.552702	0.553687	4.20808	1.26814	4.20529	8.40226	2.56867	1.28445	MOB kinase activator-like 1A OS=Medicago sativa subsp. falcata GN=MOB1-A PE=2 SV=2	PREDICTED: MOB kinase activator-like 1A isoform X2 [Pyrus x bretschneideri]
MD02G1094400	9.65118	9.13709	16.0938	22.2391	27.6981	27.9391	46.4817	26.0075	49.5533	--	PREDICTED: uncharacterized protein LOC103406838 [Malus domestica]
MD10G1304600	0.632403	1.38248	1.15814	2.34235	4.70385	3.12752	5.55593	2.84164	3.98929	Transcription factor MYB102 OS=Arabidopsis thaliana GN=MYB102 PE=2 SV=1	PREDICTED: LOW QUALITY PROTEIN: protein ODORANT1-like [Malus domestica]
MD05G1042900	12.0099	3.02247	30.6745	321.26	63.9956	335.282	282.572	164.69	65.63	Protein EXORDIUM-like 2 OS=Arabidopsis thaliana GN=EXL2 PE=2 SV=1	PREDICTED: protein EXORDIUM-like 2 [Malus domestica]
MD01G1184900	2.55273	2.08623	1.0895	0.313209	0.806185	0.297044	0.533331	0.27216	0.556741	Protein NSP-INTERACTING KINASE 2 OS=Arabidopsis thaliana GN=NIK2 PE=1 SV=1	PREDICTED: BRASSINOSTEROID INSENSITIVE 1-associated receptor kinase 1-like [Malus domestica]
MD01G1194700	50.9397	23.2824	47.3809	275.136	53.9426	177.078	221.068	179.226	41.5394	Sorbitol dehydrogenase OS=Arabidopsis thaliana GN=SDH PE=1 SV=1	PREDICTED: sorbitol dehydrogenase-like [Malus domestica]
MD16G1018400	33.371	25.1043	37.5321	109.738	43.1167	115.699	122.082	115.282	72.0286	E3 ubiquitin protein ligase RIE1 OS=Arabidopsis thaliana GN=RIE1 PE=2 SV=1	PREDICTED: E3 ubiquitin protein ligase RIE1 [Malus domestica]
MD16G1038000	3.29452	1.05128	1.6703	0.518394	0.472572	0.0994984	0.673355	0.345661	0.556007	Rust resistance kinase Lr10 OS=Triticum aestivum GN=LRK10 PE=2 SV=1	PREDICTED: rust resistance kinase Lr10-like [Malus domestica]
MD05G1319600	1.32165	0.751665	1.76896	5.33929	2.71563	4.35742	6.92754	5.07182	4.6582	#N/A	#N/A
MD04G1135400	6.57261	10.3976	7.66603	1.8086	4.33953	2.20904	1.52548	1.14693	2.76023	--	PREDICTED: ultraviolet-B receptor UVR8-like isoform X3 [Malus domestica]
MD09G1080400	9.06889	10.3684	6.96996	2.87299	5.22145	3.30858	2.02584	2.27918	3.39406	Phenolic glucoside malonyltransferase 2 OS=Arabidopsis thaliana GN=PMAT2 PE=1 SV=1	PREDICTED: phenolic glucoside malonyltransferase 2-like [Malus domestica]
MD07G1222400	7.3705	19.3063	6.56488	2.37851	4.06551	3.68071	3.58604	2.16546	4.21484	Protein SMAX1-LIKE 7 OS=Arabidopsis thaliana GN=SMXL7 PE=1 SV=1	PREDICTED: protein SMAX1-LIKE 7-like [Malus domestica]
MD01G1207300	10.4422	5.85859	7.50378	4.12068	3.53547	3.3187	4.04807	3.01701	3.37597	--	PREDICTED: uncharacterized membrane protein YjcL-like [Malus domestica]
MD09G1180300	23.4008	37.6367	47.6685	173.514	49.6248	147.436	170.085	170.549	81.581	--	PREDICTED: uncharacterized protein LOC103405371 [Malus domestica]
MD04G1120100	1.83208	1.6482	1.62673	0.829674	0.447096	0.46126	0.414086	0.669147	0.608369	Type I inositol polyphosphate 5-phosphatase 8 OS=Arabidopsis thaliana GN=IP5P8 PE=2 SV=1	PREDICTED: type I inositol polyphosphate 5-phosphatase 8 isoform X2 [Malus domestica]
MD11G1296600	0.930879	0.711981	0.658384	1.81956	1.83824	1.93669	2.2407	1.52719	1.41933	Protein SLOW WALKER 1 OS=Arabidopsis thaliana GN=SWA1 PE=2 SV=1	PREDICTED: protein SLOW WALKER 1-like [Malus domestica]
MD02G1132400	0.335922	0.0477626	0.382781	5.24134	0.40078	3.4887	5.78199	5.20902	0.861072	Snakin-2 OS=Solanum tuberosum GN=SN2 PE=1 SV=1	PREDICTED: snakin-2-like [Malus domestica]
MD03G1108900	0.0510003	0.0217542	0.0249062	0.262816	0.593258	0.378329	0.731525	0.296566	0.759864	Protein NRT1/ PTR FAMILY 2.6 OS=Arabidopsis thaliana GN=NPF2.6 PE=2 SV=1	PREDICTED: protein NRT1/ PTR FAMILY 2.6-like isoform X1 [Malus domestica]
MD09G1043700	88.4392	15.6639	58.2154	15.7967	14.3934	9.89751	10.8804	11.7993	12.076	AAA-ATPase ASD, mitochondrial OS=Arabidopsis thaliana GN=AATP1 PE=1 SV=1	PREDICTED: AAA-ATPase At3g28580-like [Malus domestica]
MD08G1207200	0.254822	0.518388	0.114871	0	0	0.0193878	0	0	0	--	PREDICTED: uncharacterized protein LOC103410935 [Malus domestica]
MD07G1097700	2.55791	0.513448	6.02539	29.3353	10.0978	19.6447	48.1999	34.3618	33.2656	--	PREDICTED: uncharacterized mitochondrial protein AtMg00810-like [Malus domestica]
MD11G1202100	41.5874	47.7607	84.0039	169.428	95.8403	193.669	121.74	204.524	156.453	Serine acetyltransferase 3, mitochondrial OS=Arabidopsis thaliana GN=SAT3 PE=1 SV=3	chloroplast-like serine acetyltransferase 1 [Pyrus pyrifolia]
MD13G1165000	331.811	109.789	165.757	46.357	84.3592	23.1062	31.5471	68.5665	94.508	RING-H2 finger protein ATL2 OS=Arabidopsis thaliana GN=ATL2 PE=2 SV=2	PREDICTED: RING-H2 finger protein ATL2-like [Malus domestica]
MD03G1273200	2.94371	2.29547	3.41423	6.77496	4.63015	6.25537	8.15876	8.16978	6.25609	Pentatricopeptide repeat-containing protein At2g30780 OS=Arabidopsis thaliana GN=At2g30780 PE=2 SV=1	PREDICTED: pentatricopeptide repeat-containing protein At2g30780 [Malus domestica]
MD11G1030300	1.29431	0.870177	1.33951	2.62819	1.92514	2.67059	3.27039	3.03593	2.98264	Putative disease resistance RPP13-like protein 1 OS=Arabidopsis thaliana GN=RPPL1 PE=3 SV=1	PREDICTED: putative disease resistance protein At3g14460 [Malus domestica]
MD05G1283300	0.760974	0.97378	1.1892	8.16973	1.36184	6.92457	4.58433	2.65503	1.6824	LRR receptor-like serine/threonine-protein kinase HSL2 OS=Arabidopsis thaliana GN=HSL2 PE=2 SV=1	PREDICTED: LRR receptor-like serine/threonine-protein kinase HSL2 [Malus domestica]
MD00G1172900	181.008	69.7494	129.851	44.1998	60.4435	31.8968	39.5694	43.4856	48.8187	Putative disease resistance RPP13-like protein 1 OS=Arabidopsis thaliana GN=RPPL1 PE=3 SV=1	PREDICTED: putative disease resistance RPP13-like protein 1 [Malus domestica]
MD16G1221200	5.45866	6.04124	5.54766	3.04105	1.71615	2.33475	1.83397	3.27559	2.26901	--	PREDICTED: dCTP pyrophosphatase 1-like [Malus domestica]
MD06G1145000	1.32686	0.471643	0.410385	0.0379867	0.118728	0.153111	0.169172	0.0467616	0.0850286	Probable inactive leucine-rich repeat receptor-like protein kinase At3g03770 OS=Arabidopsis thaliana GN=At3g03770 PE=2 SV=1	PREDICTED: probable inactive leucine-rich repeat receptor-like protein kinase At3g03770 [Malus domestica]
MD13G1116600	0.584025	0.451523	0.463468	0.141076	0.146978	0.0902583	0.174521	0.038592	0.0877169	Receptor protein kinase-like protein ZAR1 OS=Arabidopsis thaliana GN=ZAR1 PE=1 SV=1	PREDICTED: probable inactive leucine-rich repeat receptor-like protein kinase At1g66830 [Malus domestica]
MD17G1283300	3.62145	5.59965	9.2849	41.2123	12.3544	22.3871	52.5938	34.699	34.8109	Probable calcium-binding protein CML14 OS=Arabidopsis thaliana GN=CML14 PE=2 SV=1	PREDICTED: LOW QUALITY PROTEIN: probable calcium-binding protein CML13 [Malus domestica]
MD12G1149200	6.10029	14.8056	8.72946	3.2086	4.48533	2.94671	1.58268	3.54981	2.40918	Ultraviolet-B receptor UVR8 OS=Arabidopsis thaliana GN=UVR8 PE=1 SV=1	PREDICTED: ultraviolet-B receptor UVR8 isoform X4 [Malus domestica]
MD05G1308000	1.11301	0.753057	1.19954	0.296668	0.171711	0.0379608	0.1468	0.486931	0.147568	UDP-glycosyltransferase 79B30 OS=Glycine max GN=FG3 PE=1 SV=1	PREDICTED: UDP-glycosyltransferase 79B30-like [Malus domestica]
MD05G1318800	8.11932	25.2752	6.93237	3.048	3.07929	4.36106	2.82794	2.55824	3.56635	#N/A	#N/A
MD01G1082700	25.0403	25.0625	37.9033	91.0673	43.3944	75.0976	82.8616	68.6025	48.7136	Transcription factor bHLH13 OS=Arabidopsis thaliana GN=BHLH13 PE=2 SV=1	PREDICTED: transcription factor bHLH13-like [Malus domestica]
MD03G1004400	16.2128	24.1629	18.806	75.3517	26.4677	63.2053	89.6843	68.0638	27.8427	Tubulin alpha-3 chain OS=Eleusine indica GN=TUBA3 PE=2 SV=1	PREDICTED: tubulin alpha-3 chain [Malus domestica]
MD07G1248700	15.9193	6.95129	15.1064	66.5488	13.9746	120.592	56.8504	132.973	29.0816	Ethylene-responsive transcription factor ERF106 OS=Arabidopsis thaliana GN=ERF106 PE=2 SV=1	ethylene-responsive transcription factor ERF106-like [Malus domestica]
MD16G1072900	3.88216	6.64064	4.17865	2.0584	2.17997	2.5664	2.55692	2.21978	2.36086	--	PREDICTED: uncharacterized protein LOC103402899 [Malus domestica]
novel.351	3.93603	2.63128	4.02421	9.42993	5.43743	9.37983	4.35806	10.2454	8.60684	#N/A	#N/A
MD02G1249800	23.4669	2.24915	14.7873	2.84727	2.80289	1.31675	3.26989	4.30534	3.76374	Rust resistance kinase Lr10 OS=Triticum aestivum GN=LRK10 PE=2 SV=1	PREDICTED: rust resistance kinase Lr10-like [Malus domestica]
MD07G1234700	647.498	380.093	487.19	143.257	295.906	124.766	93.6607	168.787	154.542	Probable WRKY transcription factor 70 OS=Arabidopsis thaliana GN=WRKY70 PE=2 SV=1	PREDICTED: LOW QUALITY PROTEIN: probable WRKY transcription factor 70 [Malus domestica]
MD14G1066100	1.5007	1.4676	1.60875	0.377241	0.49128	0.687859	0.525009	0.541782	0.633307	Zinc finger protein WIP2 OS=Arabidopsis thaliana GN=WIP2 PE=1 SV=1	PREDICTED: zinc finger protein WIP2 isoform X1 [Pyrus x bretschneideri]
MD02G1068200	1.70014	0.58999	3.18036	48.3352	3.1973	57.1457	42.5723	37.7782	3.18539	--	PREDICTED: uncharacterized protein LOC103449874 [Malus domestica]
MD01G1092300	4.25144	5.33112	3.80222	1.30513	2.56669	2.02653	1.87759	1.26363	3.11833	Protein NTM1-like 9 OS=Arabidopsis thaliana GN=NTL9 PE=1 SV=1	PREDICTED: NAC domain-containing protein 30-like isoform X2 [Malus domestica]
MD09G1140700	22.2179	15.125	26.0112	80.8587	30.0217	65.7044	66.8125	65.0926	52.6007	UDP-glycosyltransferase 71A15 OS=Malus domestica GN=UGT71A15 PE=1 SV=1	uDP-glycosyltransferase 71A15 [Malus domestica]
novel.542	0.240744	0.246455	0.611356	1.57144	1.12018	2.71454	2.85459	6.56692	3.00837	#N/A	#N/A
MD00G1007900	2.89852	2.0606	1.93023	0.980692	0.825237	0.608128	0.33596	0.789344	0.886508	Transcription repressor OFP5 OS=Arabidopsis thaliana GN=OFP5 PE=1 SV=1	PREDICTED: transcription repressor OFP5 [Malus domestica]
MD07G1149700	2.46785	0.728765	1.57601	0.163043	0.0849322	0.0938815	0.0907633	0.401412	0.182476	--	PREDICTED: uncharacterized protein LOC103410197 [Malus domestica]
MD15G1275800	2.68624	1.41318	4.02297	0.422975	0.240366	0.97421	0.770606	0.426013	0.774637	Salicylic acid-binding protein 2 OS=Nicotiana tabacum GN=SABP2 PE=1 SV=1	PREDICTED: salicylic acid-binding protein 2-like [Malus domestica]
MD07G1280900	5.18617	7.35544	5.8885	2.44984	2.84237	3.20599	2.72756	2.74159	2.92878	Nuclear pore complex protein NUP160 OS=Arabidopsis thaliana GN=NUP160 PE=1 SV=2	PREDICTED: nuclear pore complex protein NUP160-like [Malus domestica]
MD02G1018900	10.6049	3.03303	8.5324	3.00119	1.76335	1.36641	2.13696	2.98565	2.61682	Probable receptor-like protein kinase At2g23200 OS=Arabidopsis thaliana GN=At2g23200 PE=3 SV=1	PREDICTED: probable receptor-like protein kinase At2g23200 [Malus domestica]
MD15G1193000	4.26145	5.02038	5.66851	2.30059	2.90527	2.00712	1.16427	2.18839	2.14567	Putative RING-H2 finger protein ATL12 OS=Arabidopsis thaliana GN=ATL12 PE=3 SV=1	PREDICTED: E3 ubiquitin-protein ligase ATL42-like [Malus domestica]
MD04G1154600	0.372402	1.20018	1.1316	4.7266	2.07341	3.64246	3.52147	2.36237	2.1478	Trihelix transcription factor GT-3a OS=Arabidopsis thaliana GN=GT-3A PE=1 SV=1	PREDICTED: trihelix transcription factor GT-3b-like [Malus domestica]
MD17G1066700	3.85815	2.94674	4.0445	6.22829	6.32619	9.5901	5.67883	10.2298	10.7181	Uncharacterized protein At1g04910 OS=Arabidopsis thaliana GN=At1g04910 PE=2 SV=1	PREDICTED: uncharacterized protein At1g04910-like [Pyrus x bretschneideri]
MD07G1156200	4.36218	34.8097	14.2522	54.7725	115.648	90.5299	218.198	62.7313	95.0312	Homeobox-leucine zipper protein ATHB-7 OS=Arabidopsis thaliana GN=ATHB-7 PE=1 SV=2	PREDICTED: homeobox-leucine zipper protein ATHB-12-like [Malus domestica]
MD07G1266500	11.8035	17.9176	24.1473	3.57289	6.50659	8.96515	4.33369	10.0122	4.61644	Heat stress transcription factor B-2a OS=Arabidopsis thaliana GN=HSFB2A PE=2 SV=1	PREDICTED: heat stress transcription factor B-2a-like [Malus domestica]
MD05G1285000	0.0348905	0.0297651	0.0681557	0.958926	0.312201	0.483137	0.633908	0.258221	0.201229	Cytochrome P450 710A11 OS=Solanum lycopersicum GN=CYP710A11 PE=1 SV=1	PREDICTED: cytochrome P450 710A11-like [Malus domestica]
MD15G1180300	3.23937	0.759966	1.10737	0.13911	0.217395	0.0801008	0.232321	0.171245	0.0778454	Pentatricopeptide repeat-containing protein At1g08070, chloroplastic OS=Arabidopsis thaliana GN=PCMP-H12 PE=2 SV=1	PREDICTED: pentatricopeptide repeat-containing protein At1g08070, chloroplastic-like [Malus domestica]
MD12G1017400	3.52143	0.0606896	1.70234	0.0916502	0.127313	0.105546	0.340134	0.0376071	0.0683826	Tocopherol O-methyltransferase, chloroplastic OS=Arabidopsis thaliana GN=VTE4 PE=1 SV=2	PREDICTED: tocopherol O-methyltransferase, chloroplastic-like [Pyrus x bretschneideri]
MD06G1073200	8.42193	13.6572	9.14762	3.30489	5.6195	4.91903	3.78369	3.68452	5.05968	F-box protein PP2-A12 OS=Arabidopsis thaliana GN=P2A12 PE=2 SV=1	PREDICTED: F-box protein PP2-A12-like [Malus domestica]
novel.631	0.0127286	0.0108588	0.087025	0.306103	0.501143	0.188846	0.170402	0.430643	0.293646	#N/A	#N/A
MD11G1313600	2.79378	2.45051	4.80406	12.7072	5.4575	10.9364	11.0623	11.6071	4.57668	Probable E3 ubiquitin-protein ligase BAH1-like 1 OS=Oryza sativa subsp. indica GN=OsI_27296 PE=3 SV=1	PREDICTED: probable E3 ubiquitin-protein ligase BAH1-like 1 [Malus domestica]
MD17G1058100	9.36275	14.1737	9.20444	2.70674	5.72211	1.5737	4.33021	1.26163	1.99997	UDP-glycosyltransferase 83A1 OS=Arabidopsis thaliana GN=UGT83A1 PE=2 SV=1	PREDICTED: UDP-glycosyltransferase 83A1-like [Malus domestica]
MD08G1097900	10.4563	8.90147	13.2873	55.4339	12.1534	49.8385	87.3358	73.7317	24.7572	Probable serine/threonine-protein kinase At1g01540 OS=Arabidopsis thaliana GN=At1g01540 PE=1 SV=2	PREDICTED: probable serine/threonine-protein kinase At1g01540 [Malus domestica]
MD15G1439200	7.15381	2.52835	4.01763	0.833856	2.03469	0.935011	1.36815	2.02594	1.54722	LRR receptor-like serine/threonine-protein kinase EFR OS=Arabidopsis thaliana GN=EFR PE=1 SV=1	PREDICTED: probable LRR receptor-like serine/threonine-protein kinase At3g47570 isoform X2 [Malus domestica]
MD15G1312100	3.19948	2.0996	1.26601	0.944165	0.704717	0.632915	0.34517	1.19696	0.646638	Protein NETWORKED 2D OS=Arabidopsis thaliana GN=NET2D PE=3 SV=1	PREDICTED: protein NETWORKED 2D-like [Malus domestica]
MD16G1029200	0	0	0	0.554744	0.231181	1.14993	0.494106	0.478023	0.124173	Uncharacterized protein At1g66480 OS=Arabidopsis thaliana GN=At1g66480 PE=2 SV=1	PREDICTED: uncharacterized protein At1g66480 [Malus domestica]
MD17G1219700	5.88895	8.63477	5.06876	3.06632	3.19461	1.82022	1.61898	1.98461	4.104	--	PREDICTED: uncharacterized protein LOC103403130 [Malus domestica]
novel.565	0.194833	0.26244	0.260403	2.67738	0.35785	0.872253	2.58868	2.34179	1.44896	#N/A	#N/A
MD10G1073900	5.96775	5.18899	9.13544	20.8471	11.2447	16.7431	32.2641	19.9599	14.0653	Universal stress protein A-like protein OS=Arabidopsis thaliana GN=At3g01520 PE=1 SV=2	PREDICTED: uncharacterized protein LOC103420919 [Malus domestica]
MD03G1045100	0.596215	0.932491	0.582328	0.0426726	0.0889159	0.0491425	0	0	0.0955176	--	PREDICTED: uncharacterized protein LOC108175078 [Malus domestica]
MD14G1141200	10.8999	5.97546	10.4997	50.8937	13.8423	26.5634	64.758	32.4735	21.999	Protein DMR6-LIKE OXYGENASE 2 OS=Arabidopsis thaliana GN=DLO2 PE=2 SV=1	PREDICTED: protein DMR6-LIKE OXYGENASE 2-like [Malus domestica]
MD12G1042100	3.23069	6.069	3.69729	1.65364	1.86882	1.96891	1.09218	1.10407	1.94484	Nuclear transcription factor Y subunit A-10 OS=Arabidopsis thaliana GN=NFYA10 PE=2 SV=2	PREDICTED: nuclear transcription factor Y subunit A-10-like [Malus domestica]
MD03G1094900	26.6136	18.3431	27.7438	12.8999	3.58389	6.20291	4.989	11.4223	3.79932	--	PREDICTED: uncharacterized protein LOC103418808 [Malus domestica]
MD17G1048100	1.14133	1.07893	1.56667	8.18644	1.35249	8.05468	5.4569	5.60949	1.00814	--	PREDICTED: katanin p80 WD40 repeat-containing subunit B1-like [Malus domestica]
MD08G1040500	1.22224	2.2458	0.948896	0.430665	0.476726	0.278978	0.209776	0.23194	0.421747	Protein NRT1/ PTR FAMILY 4.5 OS=Arabidopsis thaliana GN=NPF4.5 PE=2 SV=1	PREDICTED: protein NRT1/ PTR FAMILY 4.5-like [Pyrus x bretschneideri]
MD02G1250800	5.66975	4.01106	2.79136	1.78155	0.412465	0.866259	1.14603	2.58298	1.5065	Rust resistance kinase Lr10 OS=Triticum aestivum GN=LRK10 PE=2 SV=1	PREDICTED: rust resistance kinase Lr10-like, partial [Malus domestica]
MD11G1299700	4.96704	7.69177	5.4314	2.96768	1.4493	2.56322	2.58134	2.45451	2.12777	Membrane-anchored ubiquitin-fold protein 3 OS=Oryza sativa subsp. japonica GN=MUB3 PE=3 SV=1	PREDICTED: membrane-anchored ubiquitin-fold protein 3-like [Malus domestica]
MD10G1306700	1.20472	0.0186863	2.01101	0.0752507	0.0587992	0.021665	0.188508	0.0694752	0.021055	G-type lectin S-receptor-like serine/threonine-protein kinase At1g61390 OS=Arabidopsis thaliana GN=At1g61390 PE=3 SV=1	PREDICTED: G-type lectin S-receptor-like serine/threonine-protein kinase At1g61550 [Malus domestica]
MD06G1094200	30.5008	1.22448	9.67312	0.924574	0.577953	0.141967	0.892137	2.2763	2.96635	Late embryogenesis abundant protein At1g64065 OS=Arabidopsis thaliana GN=At1g64065 PE=2 SV=1	PREDICTED: late embryogenesis abundant protein At1g64065-like [Malus domestica]
MD13G1098700	2.13022	1.36919	1.71009	0.676696	0.417782	0.779294	0.61389	0.894718	0.336601	GDSL esterase/lipase At5g14450 OS=Arabidopsis thaliana GN=At5g14450 PE=2 SV=1	PREDICTED: GDSL esterase/lipase At5g14450-like [Malus domestica]
MD17G1110500	11.4827	22.1631	15.8415	6.16383	8.09135	5.96262	4.11755	5.31137	7.03646	--	PREDICTED: uncharacterized protein LOC103955039 [Pyrus x bretschneideri]
MD15G1157900	4.51833	3.24681	5.96957	12.9302	6.91171	15.1873	23.575	29.9113	22.7792	Protein ENHANCED DISEASE RESISTANCE 2-like OS=Arabidopsis thaliana GN=EDR2L PE=2 SV=1	PREDICTED: protein ENHANCED DISEASE RESISTANCE 2-like isoform X1 [Pyrus x bretschneideri]
MD05G1305900	8.6751	3.91135	9.23487	2.79405	2.91094	3.12358	0.927781	2.95674	1.88356	Glutamate receptor 2.7 OS=Arabidopsis thaliana GN=GLR2.7 PE=2 SV=3	PREDICTED: glutamate receptor 2.7-like [Malus domestica]
MD10G1234000	4.51472	3.79403	7.70029	1.90985	2.23093	1.59957	0.708785	1.85232	1.03635	#N/A	#N/A
MD14G1139300	4.84979	2.27555	2.86184	1.47523	1.37421	1.13926	1.46856	0.85459	1.88415	Subtilisin-like protease SBT3.10 OS=Arabidopsis thaliana GN=SBT3.10 PE=3 SV=2	PREDICTED: subtilisin-like protease SBT3.10 [Malus domestica]
MD15G1068500	5.95099	0.733314	7.1686	0.227161	0.94666	0.0654006	0.189685	0.768998	1.14406	--	PREDICTED: uncharacterized protein LOC103455887 [Malus domestica]
novel.614	4.55735	2.73202	4.15044	6.87625	9.03758	8.64977	5.94795	11.6552	13.6749	#N/A	#N/A
MD05G1106500	0	0	0	0.70073	0.243349	0.941467	5.72123	4.81617	7.1236	#N/A	#N/A
MD11G1065600	1.55705	0.817429	1.21663	0.432053	0.428695	0.3554	0.229063	0.405225	0.598681	Serine/threonine-protein kinase STY8 OS=Arabidopsis thaliana GN=STY8 PE=1 SV=2	PREDICTED: probable LIM domain-containing serine/threonine-protein kinase DDB_G0287001 [Malus domestica]
MD11G1204900	3.02572	3.72071	2.76888	10.348	4.34164	9.9757	9.25337	7.57963	7.88686	Scarecrow-like transcription factor PAT1 OS=Arabidopsis thaliana GN=PAT1 PE=2 SV=1	PREDICTED: scarecrow-like protein 21 [Malus domestica]
MD01G1225900	5.36705	12.7257	6.75309	3.72377	2.92249	3.306	3.57973	3.00886	3.81877	Metal-nicotianamine transporter YSL3 OS=Arabidopsis thaliana GN=YSL3 PE=2 SV=1	PREDICTED: metal-nicotianamine transporter YSL3-like [Malus domestica]
MD11G1246900	21.5817	9.42803	19.5516	6.7159	7.27675	4.94985	6.0815	7.60589	6.41397	Cytochrome c oxidase copper chaperone 1 OS=Arabidopsis thaliana GN=COX17-1 PE=2 SV=1	PREDICTED: cytochrome c oxidase copper chaperone 2 [Malus domestica]
MD11G1316800	1.44504	0.911172	0.582961	0.161883	0.224874	0.27964	0.0300391	0.0664259	0.120785	Myb-related protein P OS=Zea mays GN=P PE=2 SV=1	PREDICTED: uncharacterized protein LOC103449226 [Malus domestica]
MD15G1160000	137.982	91.475	117.334	19.1457	65.6892	23.2504	15.1056	36.2829	32.7054	Probable E3 ubiquitin-protein ligase RHY1A OS=Arabidopsis thaliana GN=RHY1A PE=2 SV=1	PREDICTED: probable E3 ubiquitin-protein ligase RHY1A [Malus domestica]
MD13G1036100	80.7663	44.1161	81.974	39.4596	19.498	23.2368	21.5012	41.9243	29.3974	LEAF RUST 10 DISEASE-RESISTANCE LOCUS RECEPTOR-LIKE PROTEIN KINASE-like 1.2 OS=Arabidopsis thaliana GN=LRK10L-1.2 PE=2 SV=3	LEAF RUST 10 DISEASE-RESISTANCE LOCUS RECEPTOR-LIKE PROTEIN KINASE-like 1.2 isoform X1 [Prunus persica]
MD16G1038700	35.5498	4.10525	22.1197	5.60541	4.2252	2.35008	7.65009	4.99235	6.30243	Rust resistance kinase Lr10 OS=Triticum aestivum GN=LRK10 PE=2 SV=1	PREDICTED: LEAF RUST 10 DISEASE-RESISTANCE LOCUS RECEPTOR-LIKE PROTEIN KINASE-like 2.1 [Malus domestica]
MD02G1111800	0.654379	0.383797	0.319568	1.61583	1.17108	1.82036	1.64257	2.50797	1.61185	TMV resistance protein N OS=Nicotiana glutinosa GN=N PE=1 SV=1	PREDICTED: TMV resistance protein N-like [Pyrus x bretschneideri]
MD11G1041800	4.82338	10.4331	4.8326	1.87088	2.17191	3.17024	1.33905	1.25023	1.55544	Probable amino acid permease 7 OS=Arabidopsis thaliana GN=AAP7 PE=2 SV=1	PREDICTED: probable amino acid permease 7 [Pyrus x bretschneideri]
MD05G1226800	1.88773	1.46402	2.43042	5.91413	2.95601	5.3468	7.67176	6.19165	5.23749	G-type lectin S-receptor-like serine/threonine-protein kinase At1g67520 OS=Arabidopsis thaliana GN=At1g67520 PE=2 SV=3	PREDICTED: receptor-like serine/threonine-protein kinase SD1-7 isoform X2 [Malus domestica]
MD07G1023100	3.47958	2.21416	2.36783	0.48992	1.32708	0.902719	0.600005	0.512627	0.63056	Serine carboxypeptidase-like 40 OS=Arabidopsis thaliana GN=SCPL40 PE=2 SV=2	PREDICTED: serine carboxypeptidase-like 40 [Pyrus x bretschneideri]
MD12G1194100	3.03006	2.72659	3.40543	1.17644	0.631401	1.56008	0.595367	0.921581	0.279292	--	PREDICTED: uncharacterized protein LOC103413931 [Malus domestica]
MD17G1262600	211.206	109.529	206.04	51.0629	71.2657	13.0162	10.998	64.8025	68.1007	U-box domain-containing protein 21 OS=Arabidopsis thaliana GN=PUB21 PE=2 SV=1	PREDICTED: U-box domain-containing protein 21-like [Malus domestica]
MD00G1032400	1.12509	0.599886	1.95053	2.65735	5.33571	4.06179	5.35238	4.72837	2.92001	Serine carboxypeptidase-like 48 OS=Arabidopsis thaliana GN=SCPL48 PE=2 SV=2	PREDICTED: serine carboxypeptidase-like [Malus domestica]
MD09G1230900	16.6959	7.80985	13.2237	6.44679	4.9903	3.46927	4.02484	6.11888	5.7654	ATP-dependent RNA helicase DEAH12, chloroplastic OS=Arabidopsis thaliana GN=At5g10370 PE=3 SV=1	PREDICTED: probable E3 ubiquitin-protein ligase RNF217 [Malus domestica]
MD06G1115400	2.73856	2.11432	3.78481	6.33883	4.77843	6.88005	6.9265	6.12377	5.33064	Probable disease resistance protein At5g66900 OS=Arabidopsis thaliana GN=At5g66900 PE=3 SV=1	PREDICTED: uncharacterized protein LOC103420272 [Malus domestica]
MD07G1108600	5.46018	4.62225	4.63561	19.2273	6.35153	15.6202	24.4996	19.8499	11.4661	--	uncharacterized LOC103447875 [Malus domestica]
MD09G1270500	19.2101	33.7051	18.4588	5.00981	6.68084	12.9234	3.86724	6.2493	5.60693	--	PREDICTED: uncharacterized protein LOC103417449 [Malus domestica]
MD02G1063800	2.79798	2.51957	4.09921	9.38181	5.08315	6.62511	7.12124	8.77008	5.24322	TMV resistance protein N OS=Nicotiana glutinosa GN=N PE=1 SV=1	PREDICTED: TMV resistance protein N-like [Pyrus x bretschneideri]
MD08G1180000	7.00228	3.76119	3.79955	9.00871	14.8004	10.6026	10.4433	11.3944	9.83317	Transcription initiation factor TFIID subunit 5 OS=Arabidopsis thaliana GN=TAF5 PE=1 SV=1	PREDICTED: uncharacterized WD repeat-containing protein C2A9.03-like isoform X1 [Pyrus x bretschneideri]
MD04G1216200	1.42344	18.9234	4.69221	58.0711	96.2704	144.721	62.5559	50.6042	41.7321	#N/A	#N/A
MD16G1090600	208.239	62.286	215.127	62.1592	50.8181	23.5105	43.8321	44.6402	59.0893	--	PREDICTED: uncharacterized protein LOC103403005 [Malus domestica]
MD01G1209000	998.066	500.964	1063.41	315.947	423.11	157.224	235.856	334.139	359.598	Heavy metal-associated isoprenylated plant protein 39 OS=Arabidopsis thaliana GN=HIPP39 PE=2 SV=1	PREDICTED: FK506-binding protein 4-like [Malus domestica]
MD16G1045000	1.53865	0.700066	1.36923	0.146834	0.336549	0.372011	0.457742	0.397655	0.262935	Aluminum-activated malate transporter 4 OS=Arabidopsis thaliana GN=ALMT4 PE=3 SV=1	PREDICTED: aluminum-activated malate transporter 4-like [Malus domestica]
MD10G1282500	59.0521	98.4301	57.7598	16.967	42.0587	20.8028	13.0686	13.4141	16.3291	Protein trichome birefringence-like 38 OS=Arabidopsis thaliana GN=TBL38 PE=2 SV=1	PREDICTED: protein trichome birefringence-like 38 [Malus domestica]
MD06G1091500	32.8827	28.8374	33.9964	19.1155	15.423	8.85512	15.6818	10.7925	9.4905	--	PREDICTED: uncharacterized protein LOC103439247 [Malus domestica]
MD02G1065400	42.3581	64.1038	69.4563	173.152	82.9291	152.088	155.853	148.257	82.0833	Senescence/dehydration-associated protein At4g35985, chloroplastic OS=Arabidopsis thaliana GN=P85 PE=2 SV=1	PREDICTED: uncharacterized protein LOC103426655 isoform X1 [Malus domestica]
MD16G1116200	0	0.229941	0.526516	3.38563	0.602954	4.03225	2.83514	4.27458	0.518177	Geraniol 8-hydroxylase OS=Catharanthus roseus GN=CYP76B6 PE=1 SV=1	PREDICTED: geraniol 8-hydroxylase-like isoform X1 [Pyrus x bretschneideri]
MD15G1106000	0.742194	1.33668	1.24845	0.442673	0.40585	0.203916	0.157714	0.305161	0.4558	Probable cyclic nucleotide-gated ion channel 14 OS=Arabidopsis thaliana GN=CNGC14 PE=2 SV=2	PREDICTED: probable cyclic nucleotide-gated ion channel 14 [Malus domestica]
MD14G1207600	46.5413	23.1546	55.9407	164.199	74.5915	105.99	105.162	180.083	157.638	Probable 2-oxoglutarate-dependent dioxygenase At5g05600 OS=Arabidopsis thaliana GN=At5g05600 PE=2 SV=1	PREDICTED: protein DMR6-LIKE OXYGENASE 2-like [Malus domestica]
MD05G1174700	0.0916963	0.250324	0.197033	1.65386	0.328201	0.961376	2.03425	1.1052	0.616995	Myosin-binding protein 3 OS=Arabidopsis thaliana GN=MYOB3 PE=1 SV=1	PREDICTED: uncharacterized protein LOC103435834 [Malus domestica]
MD01G1086900	1.61147	3.81875	4.47698	6.42813	16.4703	9.20915	11.3345	9.84396	28.6051	Transcription factor MYC2 OS=Arabidopsis thaliana GN=MYC2 PE=1 SV=2	PREDICTED: transcription factor bHLH14-like [Malus domestica]
MD11G1102000	0.735608	2.09182	0.718474	1.47418	17.5527	14.7942	3.51708	8.03661	8.72085	#N/A	#N/A
MD10G1097100	9.08414	1.93742	13.4673	39.9161	28.5224	30.7256	105.48	87.4685	78.9002	Probable cinnamyl alcohol dehydrogenase 2 OS=Eucalyptus gunnii GN=CAD2 PE=2 SV=1	probable cinnamyl alcohol dehydrogenase 1 [Pyrus x bretschneideri]
MD12G1216300	1739.04	1389.58	1539.56	240.263	844.933	176.127	138.153	541.036	541.279	Protein SRC2 OS=Glycine max GN=SRC2 PE=2 SV=1	PREDICTED: protein SRC2-like [Malus domestica]
MD01G1152300	140.966	83.6382	117.28	32.9262	70.8316	38.3911	19.0151	57.2099	38.5967	--	PREDICTED: uncharacterized protein LOC103437252 [Malus domestica]
MD06G1100900	170.405	745.199	450.577	152.454	134.793	146.908	45.6914	167.382	126.17	--	hypothetical protein PRUPE_5G114500 [Prunus persica]
novel.448	2.74391	3.86509	1.55814	0.986509	0.285495	0.56804	0.610192	1.21439	0.674722	#N/A	#N/A
MD07G1231300	2.1538	1.37805	1.76896	0.672666	0.525606	0.532574	0.468077	0.258766	0.376421	--	PREDICTED: uncharacterized protein LOC103432902 isoform X1 [Malus domestica]
novel.134	0	0.0275089	0	0.235407	0.187549	0.223258	2.12759	1.3637	1.68928	#N/A	#N/A
MD12G1107600	17.826	14.4397	25.4047	58.3334	26.8019	59.6335	57.0791	78.2418	56.5127	E3 ubiquitin-protein ligase MIEL1 OS=Arabidopsis thaliana GN=MIEL1 PE=1 SV=1	PREDICTED: E3 ubiquitin-protein ligase MIEL1-like [Pyrus x bretschneideri]
MD03G1277900	19.7731	143.533	63.4556	14.1016	21.3265	17.1127	15.5314	9.70615	8.82455	Monothiol glutaredoxin-S9 OS=Arabidopsis thaliana GN=GRXS9 PE=3 SV=1	PREDICTED: monothiol glutaredoxin-S9-like [Malus domestica]
MD09G1187300	0.979162	0.0759385	0.956356	9.45458	1.40716	4.49022	5.92997	4.07821	1.93946	--	PREDICTED: pollen-specific leucine-rich repeat extensin-like protein 1 [Malus domestica]
MD12G1103300	5.65038	1.56806	5.08658	1.49096	0.700527	1.07735	0.878817	1.07963	0.817977	Protein DMR6-LIKE OXYGENASE 1 OS=Arabidopsis thaliana GN=DLO1 PE=1 SV=1	PREDICTED: LOW QUALITY PROTEIN: protein DMR6-LIKE OXYGENASE 1 [Malus domestica]
MD06G1144200	4.89689	9.85753	7.88748	2.32426	3.61303	3.52638	1.72516	2.22535	3.75741	Probable adenylate kinase 7, mitochondrial OS=Arabidopsis thaliana GN=At3g01820 PE=2 SV=1	PREDICTED: probable adenylate kinase 7, mitochondrial isoform X1 [Malus domestica]
MD16G1157700	5.28749	3.4115	6.77005	42.1308	5.08909	24.5229	25.9178	29.126	4.74086	GTP-binding protein SAR1A OS=Arabidopsis thaliana GN=SAR1A PE=2 SV=1	PREDICTED: GTP-binding protein SAR1A-like [Malus domestica]
MD15G1296400	362.626	123.331	273.094	58.9386	128.905	57.5009	58.1192	83.0126	94.0301	Calcium-transporting ATPase 2, plasma membrane-type OS=Arabidopsis thaliana GN=ACA2 PE=1 SV=1	PREDICTED: calcium-transporting ATPase 2, plasma membrane-type-like [Malus domestica]
MD17G1133600	93.35	89.4365	144.326	324.886	147.056	335.493	262.684	324.029	211.401	Glutathione S-transferase F9 OS=Arabidopsis thaliana GN=GSTF9 PE=1 SV=1	PREDICTED: glutathione S-transferase F9-like [Pyrus x bretschneideri]
MD08G1137000	1.60881	2.49213	1.98485	0.727243	0.795552	0.837504	0.728718	0.671427	0.569746	Uncharacterized acetyltransferase At3g50280 OS=Arabidopsis thaliana GN=At3g50280 PE=3 SV=1	PREDICTED: uncharacterized acetyltransferase At3g50280-like [Malus domestica]
MD15G1208900	14.2631	5.00559	15.7294	4.85181	3.826	3.27219	2.56662	6.46754	4.23007	Putative transcription factor bHLH041 OS=Arabidopsis thaliana GN=BHLH41 PE=3 SV=1	PREDICTED: putative transcription factor bHLH041 isoform X1 [Malus domestica]
MD01G1237600	26.4067	28.0792	27.3714	2.71383	14.4735	5.99015	4.24447	5.60766	5.8938	Cinnamoyl-CoA reductase-like SNL6 OS=Oryza sativa subsp. japonica GN=SNL6 PE=3 SV=1	PREDICTED: cinnamoyl-CoA reductase 2-like isoform X2 [Malus domestica]
MD15G1124600	2.27069	1.11385	1.66335	0.0975113	0.406364	0.50533	0.434263	0.660201	0.654802	Probable carboxylesterase 17 OS=Arabidopsis thaliana GN=CXE17 PE=2 SV=1	PREDICTED: probable carboxylesterase 17 [Malus domestica]
novel.174	0.251105	0.906305	0.509378	1.47649	2.28146	1.66213	2.41963	1.87882	1.44823	#N/A	#N/A
MD03G1069500	141.252	54.3171	104.415	252.201	358.513	182.406	328.394	350.57	426.144	Isoflavonoid 7-O-beta-apiosyl-glucoside beta-glycosidase OS=Dalbergia nigrescens PE=1 SV=1	PREDICTED: beta-glucosidase 13-like [Malus domestica]
MD10G1306600	25.2087	2.96878	17.6579	3.18934	4.38606	2.41361	2.31315	3.00625	3.34511	G-type lectin S-receptor-like serine/threonine-protein kinase B120 OS=Arabidopsis thaliana GN=B120 PE=2 SV=1	PREDICTED: G-type lectin S-receptor-like serine/threonine-protein kinase B120 [Malus domestica]
MD00G1129400	1.9086	1.8161	1.64906	4.3503	3.08722	3.41253	4.03623	5.08358	5.22163	Protein JINGUBANG OS=Arabidopsis thaliana GN=JGB PE=1 SV=1	PREDICTED: myosin heavy chain kinase C-like [Malus domestica]
MD09G1145500	2.30666	2.21188	2.23547	5.80515	3.00801	8.56002	12.0032	9.69834	8.61119	Wall-associated receptor kinase-like 2 OS=Arabidopsis thaliana GN=WAKL2 PE=2 SV=1	PREDICTED: LOW QUALITY PROTEIN: wall-associated receptor kinase-like 22 [Malus domestica]
MD00G1175400	25.6671	2.3833	7.78795	2.59937	2.13525	1.66944	2.39316	3.13829	2.62946	--	PREDICTED: uncharacterized protein LOC103425035 isoform X1 [Malus domestica]
novel.400	43.9054	17.1977	36.6504	17.3049	9.50684	9.32584	11.5155	17.0956	10.111	#N/A	#N/A
MD06G1125700	6.3313	9.14055	11.3568	18.4048	27.7816	15.0534	21.9466	21.6908	28.2058	Ethylene-responsive transcription factor RAP2-11 OS=Arabidopsis thaliana GN=RAP2-11 PE=2 SV=1	PREDICTED: dehydration-responsive element-binding protein 1E-like [Malus domestica]
MD01G1211400	1.63486	2.18823	2.53282	5.59232	3.37975	4.68378	3.47702	11.563	10.6482	S-type anion channel SLAH3 OS=Arabidopsis thaliana GN=SLAH3 PE=1 SV=1	PREDICTED: S-type anion channel SLAH2-like isoform X1 [Malus domestica]
MD16G1265000	12.9824	18.0176	19.5384	43.4554	23.1847	41.0796	36.0195	54.7597	41.9374	Zinc finger protein CONSTANS-LIKE 5 OS=Arabidopsis thaliana GN=COL5 PE=2 SV=2	PREDICTED: zinc finger protein CONSTANS-LIKE 5 isoform X1 [Malus domestica]
MD17G1201600	33.6561	15.6252	39.2981	98.9003	48.3388	93.621	136.131	112.868	79.735	Root phototropism protein 3 OS=Arabidopsis thaliana GN=RPT3 PE=1 SV=2	PREDICTED: root phototropism protein 3-like [Malus domestica]
MD10G1331200	13.6947	22.4509	18.6132	7.72322	7.60342	11.0973	4.25994	7.41393	6.97844	BAG family molecular chaperone regulator 5, mitochondrial OS=Arabidopsis thaliana GN=BAG5 PE=1 SV=1	PREDICTED: BAG family molecular chaperone regulator 5, mitochondrial [Pyrus x bretschneideri]
MD06G1128400	3.60265	4.56145	4.68103	10.6547	5.76175	10.2708	31.9869	17.1317	10.9531	Chaperone protein ClpD, chloroplastic OS=Arabidopsis thaliana GN=CLPD PE=1 SV=1	PREDICTED: chaperone protein ClpD, chloroplastic-like isoform X2 [Pyrus x bretschneideri]
MD17G1281100	10.2826	5.95351	10.2407	31.6483	12.5796	24.409	16.4414	24.9509	15.0367	Protein PIN-LIKES 2 OS=Arabidopsis thaliana GN=PILS2 PE=2 SV=1	PREDICTED: protein PIN-LIKES 2-like isoform X1 [Pyrus x bretschneideri]
MD00G1133300	151.817	203.081	192.79	112.053	36.2713	54.3401	55.8263	58.8946	76.5195	Protein PLANT CADMIUM RESISTANCE 2 OS=Arabidopsis thaliana GN=PCR2 PE=1 SV=1	PREDICTED: protein PLANT CADMIUM RESISTANCE 2-like [Malus domestica]
MD14G1228600	11.8558	5.92111	12.1906	3.04454	5.11772	4.30165	1.76606	4.53519	1.9471	Protein SAR DEFICIENT 1 OS=Arabidopsis thaliana GN=SARD1 PE=1 SV=1	PREDICTED: protein SAR DEFICIENT 1-like [Malus domestica]
MD06G1203400	1.58324	2.39551	2.94684	0.74404	0.0801898	0.620476	0.142825	0.0631664	0.229716	Cytochrome P450 78A5 OS=Arabidopsis thaliana GN=CYP78A5 PE=2 SV=1	PREDICTED: cytochrome P450 78A5-like [Malus domestica]
MD13G1044600	0.9959	1.49324	0.618993	0.285116	0.297045	0.268646	0.230865	0.350978	0.174054	Transcription factor PERIANTHIA OS=Arabidopsis thaliana GN=PAN PE=1 SV=1	PREDICTED: transcription factor HBP-1b(c38)-like isoform X1 [Malus domestica]
MD12G1075400	0.627128	0.29182	1.00231	0.122414	0.0765213	0.112779	0	0.090415	0	--	PREDICTED: uncharacterized protein LOC103423272 [Malus domestica]
MD02G1014100	1.38166	3.40513	2.39908	5.44989	5.44896	7.3897	5.67626	6.4383	7.62433	Putative glycerol-3-phosphate transporter 5 OS=Arabidopsis thaliana GN=At2g13100 PE=2 SV=2	PREDICTED: putative glycerol-3-phosphate transporter 5 [Malus domestica]
MD05G1033800	7.2917	8.99328	12.1182	5.72861	3.81869	4.4447	5.56727	3.55584	4.59122	Tryptophan aminotransferase-related protein 4 OS=Arabidopsis thaliana GN=TAR4 PE=2 SV=2	PREDICTED: tryptophan aminotransferase-related protein 3-like [Malus domestica]
MD10G1175900	2.4629	4.71274	1.79853	0.53377	1.1534	1.13833	0.220104	0.316367	0.309758	Subtilisin-like protease SBT1.2 OS=Arabidopsis thaliana GN=SBT1.2 PE=2 SV=1	PREDICTED: subtilisin-like protease SBT1.2 [Malus domestica]
MD01G1225100	0.87399	0	0	2.70232	3.1282	5.01383	24.5708	6.09868	16.1302	#N/A	#N/A
MD08G1147100	31.0216	64.2819	36.4719	13.2262	19.833	22.8913	5.57531	11.0112	13.7759	Transcription factor HY5 OS=Arabidopsis thaliana GN=HY5 PE=1 SV=1	transcription factor HY5 [Malus domestica]
MD16G1074800	1.40185	2.84031	2.65283	4.28929	5.52713	7.32276	3.89584	5.37275	5.30585	Transcription factor TCP15 OS=Arabidopsis thaliana GN=TCP15 PE=1 SV=1	transcription factor TCP15-like [Malus domestica]
MD14G1004500	0.300362	0.484006	0.472645	1.89179	0.731637	1.22135	1.59565	2.15237	1.71628	Protein QUIRKY OS=Arabidopsis thaliana GN=QKY PE=2 SV=1	PREDICTED: LOW QUALITY PROTEIN: protein QUIRKY [Malus domestica]
MD10G1260700	37.8666	7.74171	54.7921	186.349	102.757	119.623	187.911	272.135	252.572	Protein TIFY 5A OS=Arabidopsis thaliana GN=TIFY5A PE=1 SV=1	PREDICTED: protein TIFY 5A [Malus domestica]
MD07G1276700	2.16917	0.359822	1.94209	5.64085	6.20034	5.30415	14.2892	6.11571	9.78833	--	PREDICTED: protein SRC2 homolog [Pyrus x bretschneideri]
MD07G1282000	1.36891	0.820253	1.1301	8.14604	1.15199	4.78727	12.4823	6.84025	2.85101	Katanin p60 ATPase-containing subunit A1 OS=Arabidopsis thaliana GN=AAA1 PE=1 SV=1	PREDICTED: uncharacterized protein LOC103439818 [Malus domestica]
MD05G1297400	1.65441	1.10203	1.39452	0.467153	0.730046	0.38107	0.32507	0.45526	0.74068	Probable LRR receptor-like serine/threonine-protein kinase At5g45780 OS=Arabidopsis thaliana GN=At5g45780 PE=2 SV=1	PREDICTED: probable LRR receptor-like serine/threonine-protein kinase At5g45780 isoform X1 [Malus domestica]
MD07G1108500	3.93216	2.92665	3.33111	12.5784	4.39814	9.40565	14.7909	13.8508	7.4245	--	PREDICTED: uncharacterized protein LOC103407257 [Malus domestica]
MD07G1033800	22.9155	11.8947	16.1401	9.81299	6.26697	7.27848	6.1417	10.476	8.28349	Eukaryotic peptide chain release factor subunit 1-3 OS=Arabidopsis thaliana GN=ERF1-3 PE=1 SV=1	PREDICTED: eukaryotic peptide chain release factor subunit 1-3-like [Malus domestica]
MD05G1238900	2.65983	4.22619	2.30561	12.9928	3.80803	13.5486	10.5552	13.3226	3.6753	Organic cation/carnitine transporter 3 OS=Arabidopsis thaliana GN=OCT3 PE=2 SV=1	PREDICTED: organic cation/carnitine transporter 3 [Malus domestica]
MD09G1152100	15.9065	15.229	15.7735	33.9453	20.1999	39.7446	51.4097	40.2811	36.4555	--	PREDICTED: uncharacterized protein LOC103429250 isoform X2 [Malus domestica]
MD08G1091900	0.788543	0.896941	1.28363	6.09531	2.11677	4.54964	12.9442	6.53067	10.2327	Coatomer subunit epsilon-1 OS=Arabidopsis thaliana GN=At1g30630 PE=2 SV=1	PREDICTED: coatomer subunit epsilon-1-like [Malus domestica]
MD00G1062800	2.94628	1.31588	2.21749	0.878224	0.914967	0.394266	0.298307	1.20936	0.816307	Probable LRR receptor-like serine/threonine-protein kinase At3g47570 OS=Arabidopsis thaliana GN=At3g47570 PE=2 SV=1	PREDICTED: putative receptor-like protein kinase At3g47110 [Malus domestica]
MD02G1100900	2.51578	1.05428	1.5519	0.492798	0.394935	0.567514	0.126615	0.653299	0.59396	TMV resistance protein N OS=Nicotiana glutinosa GN=N PE=1 SV=1	PREDICTED: TMV resistance protein N-like [Pyrus x bretschneideri]
MD10G1336000	2.43512	1.59267	1.54596	0.41829	0.87158	0.280997	0.155236	0.772373	0.234073	--	PREDICTED: uncharacterized protein LOC103412566 isoform X2 [Malus domestica]
MD14G1041300	7.04272	12.3425	7.99919	3.64022	3.93509	5.35837	2.43783	2.89756	2.87944	Nuclear transcription factor Y subunit A-10 OS=Arabidopsis thaliana GN=NFYA10 PE=2 SV=2	PREDICTED: nuclear transcription factor Y subunit A-10-like [Malus domestica]
MD09G1285400	6.63313	9.15763	6.50336	17.4389	10.1943	21.6856	21.5463	32.656	31.2961	Probable WRKY transcription factor 23 OS=Arabidopsis thaliana GN=WRKY23 PE=2 SV=1	PREDICTED: probable WRKY transcription factor 23 [Malus domestica]
MD10G1138400	0	0.0514911	0.0294759	0.181438	0.324049	1.07458	0.230865	1.05294	0.203063	Cytochrome P450 87A3 OS=Oryza sativa subsp. japonica GN=CYP87A3 PE=2 SV=3	PREDICTED: cytochrome P450 87A3-like [Malus domestica]
MD12G1164100	7.02756	7.82302	4.10158	2.57624	2.60734	1.10197	0.901464	2.44647	2.30664	--	hypothetical protein PRUPE_6G274600 [Prunus persica]
MD05G1115800	14.1054	11.05	18.789	59.4186	17.9747	47.283	59.3843	60.7843	21.5514	Transcription factor bHLH121 OS=Arabidopsis thaliana GN=BHLH121 PE=2 SV=1	PREDICTED: transcription factor bHLH121 [Pyrus x bretschneideri]
MD16G1149500	0.119692	4.08438	1.63666	0.1542	0.160651	0.118386	0	0.126547	0	Desiccation-related protein PCC13-62 OS=Craterostigma plantagineum PE=2 SV=1	PREDICTED: desiccation-related protein PCC13-62-like [Malus domestica]
MD09G1037400	4.55602	2.69643	5.08958	15.6766	6.03868	11.2095	20.34	18.0033	12.9193	Protein ALTERED XYLOGLUCAN 4-like OS=Arabidopsis thaliana GN=AXY4L PE=2 SV=1	PREDICTED: protein ALTERED XYLOGLUCAN 4-like isoform X1 [Malus domestica]
MD10G1019700	5.81593	4.49849	5.15029	2.93048	1.52654	1.61069	0.963978	1.47576	2.6089	Probable disease resistance protein RPP1 OS=Arabidopsis thaliana GN=RPP1 PE=2 SV=1	PREDICTED: TMV resistance protein N-like [Malus domestica]
MD15G1210700	8.62988	3.69139	14.4731	48.8524	16.5472	29.1219	40.9143	49.8376	27.2563	Diacylglycerol O-acyltransferase 1 OS=Corylus americana GN=DGAT1 PE=1 SV=1	PREDICTED: diacylglycerol O-acyltransferase 1 [Malus domestica]
MD05G1080100	18.0363	13.4329	17.057	4.18007	10.0762	5.28578	3.28514	4.23761	10.4574	Calmodulin-like protein 1 OS=Arabidopsis thaliana GN=CML1 PE=2 SV=1	PREDICTED: calmodulin-like protein 1 [Malus domestica]
MD15G1117400	1.34788	1.46553	1.70369	3.94965	2.15204	6.01235	5.98956	5.89589	3.40422	Cysteine-rich receptor-like protein kinase 29 OS=Arabidopsis thaliana GN=CRK29 PE=2 SV=1	cysteine-rich receptor-like protein kinase 26 [Prunus persica]
MD06G1101000	21.8275	66.8167	34.8003	5.23813	14.3613	14.6046	0.61389	5.09064	4.01116	--	hypothetical protein PRUPE_5G114500 [Prunus persica]
MD15G1417000	0.573024	0.139671	0.639631	4.14815	0.87899	3.7245	2.5049	4.58708	0.708188	--	PREDICTED: neurofilament heavy polypeptide-like isoform X1 [Pyrus x bretschneideri]
MD01G1168600	338.254	126.019	212.48	74.8535	118.797	53.6099	87.5992	87.8832	141.177	Probable WRKY transcription factor 70 OS=Arabidopsis thaliana GN=WRKY70 PE=2 SV=1	PREDICTED: probable WRKY transcription factor 70 [Malus domestica]
MD16G1196700	0.790504	0.449586	0.257364	0	0	0	0	0	0	Non-specific lipid-transfer protein-like protein At2g13820 OS=Arabidopsis thaliana GN=At2g13820 PE=1 SV=1	PREDICTED: non-specific lipid-transfer protein-like protein At2g13820 [Malus domestica]
MD04G1064200	408.555	7.93042	74.5433	3.28756	0	0.309061	20.1687	1.73442	6.00718	Thaumatin-like protein OS=Actinidia deliciosa GN=tlp PE=1 SV=2	PREDICTED: protein P21-like [Malus domestica]
novel.272	0	0	0	0.425131	3.83862	0.81598	5.52214	1.04667	1.11021	#N/A	#N/A
MD06G1119900	0.747183	0.343227	0.449095	1.06133	2.54575	1.50649	2.96786	2.24839	4.30933	Transcription factor MYC4 OS=Arabidopsis thaliana GN=MYC4 PE=1 SV=1	PREDICTED: transcription factor MYC2-like [Malus domestica]
MD03G1148300	0.140116	0	0.410557	7.70185	0.376128	2.91033	17.016	14.3696	3.63649	Cysteine proteinase inhibitor 1 OS=Actinidia deliciosa PE=1 SV=1	PREDICTED: cysteine proteinase inhibitor 1-like [Malus domestica]
MD14G1120000	0.10031	0.0855746	0.244934	2.36922	0.134637	2.48039	2.44597	2.43926	0.771377	Ethylene-responsive transcription factor CRF2 OS=Arabidopsis thaliana GN=CRF2 PE=1 SV=1	PREDICTED: ethylene-responsive transcription factor CRF2-like [Pyrus x bretschneideri]
MD01G1092700	4.06372	6.52906	4.56442	1.57059	2.78778	1.40678	0.84194	0.787682	1.69269	#N/A	#N/A
MD12G1214800	4.4939	14.3765	6.19194	3.17045	2.01058	0.793726	1.15104	2.63016	0.771377	Ankyrin repeat-containing protein BDA1 OS=Arabidopsis thaliana GN=BAD1 PE=1 SV=1	PREDICTED: alpha-latroinsectotoxin-Lt1a-like [Malus domestica]
MD15G1076600	63.4011	76.2529	74.6671	312.558	76.3044	240.514	270.058	195.226	60.7835	Transcription factor MYB44 OS=Arabidopsis thaliana GN=MYB44 PE=2 SV=1	PREDICTED: transcription factor MYB44-like [Malus domestica]
MD00G1018400	27.2778	24.1349	36.5362	12.118	18.4519	8.37316	8.09504	6.27289	19.6132	--	PREDICTED: uncharacterized protein LOC103444922 [Malus domestica]
MD02G1003300	0.158006	0.0269591	0.370383	1.92704	0.395877	1.9379	5.1069	1.93784	0.911293	UDP-glycosyltransferase 74F2 OS=Arabidopsis thaliana GN=UGT74F2 PE=1 SV=1	PREDICTED: UDP-glycosyltransferase 74F2-like [Malus domestica]
MD02G1218900	293.012	124.715	299.296	111.866	111.307	77.777	58.1394	119.041	86.9295	--	PREDICTED: PRA1 family protein B6-like [Pyrus x bretschneideri]
MD06G1199700	79.1539	39.0532	71.3249	37.5316	23.5329	21.8996	23.1953	33.7062	24.649	SNAP25 homologous protein SNAP33 OS=Arabidopsis thaliana GN=SNAP33 PE=1 SV=1	PREDICTED: SNAP25 homologous protein SNAP33-like [Malus domestica]
MD11G1105100	0.769982	1.26682	0.725189	0.259802	0.246065	0.353591	0.315551	0.377965	0.343635	Probable LRR receptor-like serine/threonine-protein kinase At3g47570 OS=Arabidopsis thaliana GN=At3g47570 PE=2 SV=1	PREDICTED: probable LRR receptor-like serine/threonine-protein kinase At3g47570 isoform X2 [Pyrus x bretschneideri]
MD16G1050800	5.88486	7.8869	5.98351	3.18886	1.69436	3.87432	1.4734	1.60945	4.10428	Phosphate transporter PHO1 homolog 1 OS=Arabidopsis thaliana GN=PHO1-H1 PE=2 SV=1	PREDICTED: phosphate transporter PHO1 homolog 1 [Malus domestica]
MD06G1104100	321.518	129.481	394.699	84.4098	139.598	50.3454	37.0746	75.4023	70.6735	Probable WRKY transcription factor 41 OS=Arabidopsis thaliana GN=WRKY41 PE=2 SV=2	PREDICTED: probable WRKY transcription factor 53 [Malus domestica]
MD05G1191100	9.59968	9.50734	15.6807	39.6134	15.205	35.797	54.9192	34.8815	28.5313	Probable carboxylesterase 13 OS=Arabidopsis thaliana GN=CXE13 PE=1 SV=1	CXE carboxylesterase [Malus pumila]
MD15G1061700	206.313	101.65	218.891	101.676	62.9851	56.5677	46.4937	90.7007	54.1512	Ferrochelatase-2, chloroplastic OS=Cucumis sativus GN=HEMH PE=2 SV=1	PREDICTED: ferrochelatase-2, chloroplastic-like [Pyrus x bretschneideri]
novel.618	0.266129	0.0957802	0.369588	1.58928	0.424174	0.863707	6.9903	4.35244	2.41024	#N/A	#N/A
MD15G1379500	17.9174	3.36277	12.355	2.64686	4.23259	2.12663	2.46719	3.90236	3.41013	Purine permease 3 OS=Arabidopsis thaliana GN=PUP3 PE=2 SV=1	PREDICTED: purine permease 3-like [Malus domestica]
MD12G1149100	5.14505	15.0267	8.39506	2.70335	4.11635	3.41257	1.2155	2.43187	2.67646	--	PREDICTED: ultraviolet-B receptor UVR8 isoform X7 [Malus domestica]
MD01G1076200	34.4784	30.6538	12.3747	5.35165	12.2662	6.57392	14.8959	7.46627	5.39056	--	hypothetical protein PRUPE_2G183600 [Prunus persica]
MD10G1212800	0.41378	0.705991	0.606213	3.19845	3.88764	2.66022	5.14372	15.3117	3.97741	#N/A	#N/A
MD10G1254300	1.48101	0.220603	2.57158	12.0739	3.8284	6.55696	16.5448	10.8117	5.62664	Cationic amino acid transporter 1 OS=Arabidopsis thaliana GN=CAT1 PE=1 SV=1	PREDICTED: cationic amino acid transporter 1-like [Malus domestica]
MD16G1031000	1.77951	1.77777	1.64658	4.92697	2.22085	5.88241	10.8591	11.9074	4.70397	--	PREDICTED: uncharacterized protein LOC103402619 [Malus domestica]
MD03G1147100	16.1055	8.15717	11.9738	6.53776	1.45785	2.27191	3.19251	7.22906	3.95374	Ankyrin repeat-containing protein ITN1 OS=Arabidopsis thaliana GN=ITN1 PE=1 SV=1	PREDICTED: ankyrin repeat-containing protein At5g02620-like [Pyrus x bretschneideri]
MD03G1001100	34.007	42.0216	85.8256	165.954	94.9412	144.303	213.623	145.539	151.288	Leucoanthocyanidin dioxygenase OS=Malus domestica GN=ANS PE=2 SV=1	PREDICTED: leucoanthocyanidin dioxygenase [Malus domestica]
MD15G1332800	3.78313	5.0493	6.25768	15.7744	7.4255	12.1912	35.3004	19.9989	16.4229	--	PREDICTED: uncharacterized protein LOC103455056 [Malus domestica]
MD16G1007900	19.1541	6.17637	18.8453	65.7433	23.586	52.1773	29.2046	54.8451	31.756	Inositol oxygenase 1 OS=Arabidopsis thaliana GN=MIOX1 PE=2 SV=1	PREDICTED: inositol oxygenase 1 [Malus domestica]
MD11G1195800	0.264598	0	0.495334	3.10583	1.16409	1.61389	13.3467	4.63922	5.40478	Acid beta-fructofuranosidase 1, vacuolar OS=Rosa hybrid cultivar PE=1 SV=1	vacuolar invertase [Malus domestica]
MD05G1256100	28.7704	12.3628	27.4023	12.6032	6.85778	8.25721	10.8184	12.2026	8.58016	Protein argonaute 2 OS=Arabidopsis thaliana GN=AGO2 PE=1 SV=1	PREDICTED: protein argonaute 2-like [Malus domestica]
MD07G1006400	22.0702	14.2834	33.7744	69.5715	34.6876	75.6267	54.4893	74.8052	31.0449	Transcription factor bHLH130 OS=Arabidopsis thaliana GN=BHLH130 PE=1 SV=1	PREDICTED: transcription factor bHLH130-like [Malus domestica]
MD14G1220800	2.6267	4.23722	3.59172	1.10749	1.96577	1.13369	1.09603	1.81776	1.42312	--	PREDICTED: uncharacterized protein LOC103929945 [Pyrus x bretschneideri]
MD04G1225000	6.91963	3.86145	6.2503	1.51928	2.7467	2.72736	2.33827	3.46543	1.50032	Auxin-responsive protein IAA3 OS=Arabidopsis thaliana GN=IAA3 PE=1 SV=1	auxin-responsive protein IAA3-like [Malus domestica]
MD03G1179200	6.20732	4.67652	5.27537	13.8129	6.96095	17.6214	19.1175	10.6965	8.33017	Fasciclin-like arabinogalactan protein 1 OS=Arabidopsis thaliana GN=FLA1 PE=1 SV=1	PREDICTED: fasciclin-like arabinogalactan protein 1 [Pyrus x bretschneideri]
MD00G1176400	10.1656	6.1945	11.0552	5.42934	3.51619	2.87278	3.34916	3.20628	3.03823	Bifunctional riboflavin kinase/FMN phosphatase OS=Arabidopsis thaliana GN=FHY PE=1 SV=1	PREDICTED: LOW QUALITY PROTEIN: bifunctional riboflavin kinase/FMN phosphatase-like [Malus domestica]
MD09G1141100	154.627	104.12	211.122	516.506	211.257	452.716	445.226	498.199	342.39	UDP-glycosyltransferase 71A15 OS=Malus domestica GN=UGT71A15 PE=1 SV=1	uDP-glycosyltransferase 71A15 [Malus domestica]
MD15G1060800	0.956653	2.81933	1.86874	7.69355	4.747	4.73107	4.74026	5.14915	5.43384	Abscisic acid receptor PYL2 OS=Arabidopsis thaliana GN=PYL2 PE=1 SV=1	PREDICTED: abscisic acid receptor PYL2-like [Malus domestica]
MD14G1140700	0	0	0.0484365	1.95927	0.0887494	0.392404	9.67394	1.73024	0.76271	Protein DMR6-LIKE OXYGENASE 2 OS=Arabidopsis thaliana GN=DLO2 PE=2 SV=1	PREDICTED: protein DMR6-LIKE OXYGENASE 2-like [Malus domestica]
MD06G1178800	2.86427	2.18629	4.22087	7.81168	5.03598	9.04576	11.5323	14.4508	8.88767	LIM domain-containing protein WLIM1 OS=Arabidopsis thaliana GN=WLIM1 PE=1 SV=1	PREDICTED: LIM domain-containing protein WLIM1-like [Malus domestica]
novel.287	0.268585	0.298865	0.250923	2.60768	0.198534	1.35715	4.15396	1.6359	0.420937	#N/A	#N/A
MD16G1161600	0.700287	1.94946	1.90793	12.219	1.45112	8.96794	20.1244	9.6251	4.78286	Heavy metal-associated isoprenylated plant protein 23 OS=Arabidopsis thaliana GN=HIPP23 PE=1 SV=1	PREDICTED: leucine-rich repeat extensin-like protein 3 [Malus domestica]
MD07G1017400	20.2252	13.2544	27.1441	94.1301	22.5966	75.3807	77.5612	62.6291	19.4412	Disease resistance protein RGA2 OS=Solanum bulbocastanum GN=RGA2 PE=1 SV=1	PREDICTED: disease resistance protein RGA2-like [Malus domestica]
MD02G1268700	1.32189	0.601443	0.688588	2.57342	3.94278	2.35344	3.79212	2.51567	2.88015	#N/A	#N/A
MD05G1030800	0	0.0242922	0	0.538042	0.076439	0.422467	1.44314	0.511801	0.0821143	Ethylene-responsive transcription factor ERF110 OS=Arabidopsis thaliana GN=ERF110 PE=2 SV=2	PREDICTED: ethylene-responsive transcription factor ABR1-like [Malus domestica]
MD07G1276500	8.53067	2.61781	4.31584	0.316262	2.00442	1.15334	2.58218	0.389319	1.20935	BAHD acyltransferase DCR OS=Arabidopsis thaliana GN=DCR PE=2 SV=1	PREDICTED: BAHD acyltransferase DCR isoform X1 [Pyrus x bretschneideri]
MD04G1050800	9.31544	2.56803	4.41017	0.908383	2.36597	1.12658	1.94493	1.29025	2.26792	Protein ECERIFERUM 2 OS=Arabidopsis thaliana GN=CER2 PE=1 SV=1	PREDICTED: taxadien-5-alpha-ol O-acetyltransferase [Malus domestica]
MD15G1059900	8.09993	4.52728	6.61546	3.62833	2.56174	3.0734	2.33699	2.36243	3.42314	Probable beta-1,3-galactosyltransferase 12 OS=Arabidopsis thaliana GN=B3GALT12 PE=2 SV=1	PREDICTED: LOW QUALITY PROTEIN: probable beta-1,3-galactosyltransferase 12 [Malus domestica]
MD02G1015200	0.156976	0.589232	0.337304	0.566254	1.8822	3.38474	2.91206	5.17815	1.90124	Benzyl alcohol O-benzoyltransferase OS=Nicotiana tabacum GN=HSR201 PE=1 SV=1	alcohol acyl transferase [Malus domestica]
MD09G1109700	1.88037	2.94093	1.93861	0.807498	0.186951	0.309976	0.29968	0.662687	0.50208	(+)-pulegone reductase OS=Mentha piperita PE=1 SV=1	PREDICTED: NADP-dependent alkenal double bond reductase P1-like [Malus domestica]
MD05G1164900	9.59648	5.03079	17.2076	26.8341	31.6931	25.2872	28.9305	27.8049	40.8766	Serine/threonine-protein kinase OXI1 OS=Arabidopsis thaliana GN=OXI1 PE=1 SV=1	PREDICTED: serine/threonine-protein kinase OXI1 [Malus domestica]
MD02G1150700	0.71452	0.457168	0.785112	2.60814	2.39758	1.76681	6.8325	2.26632	6.78239	--	PREDICTED: uncharacterized protein LOC103418311 [Malus domestica]
MD00G1116400	11.3284	17.6968	15.7106	7.83422	8.95186	5.04457	7.12794	4.51087	9.99362	Protein ODORANT1 OS=Petunia hybrida GN=ODO1 PE=2 SV=1	PREDICTED: protein ODORANT1-like [Malus domestica]
MD11G1233100	199.688	111.127	175.308	97.8083	73.1519	47.1945	26.8439	70.795	51.446	Calcium-binding protein PBP1 OS=Arabidopsis thaliana GN=PBP1 PE=1 SV=1	PREDICTED: calcium-binding protein PBP1-like [Malus domestica]
MD16G1097900	0.822738	0.482541	0.301341	0.154574	0.0230059	0.02543	0.122927	0.054366	0.0741421	--	PREDICTED: uncharacterized protein LOC103431861 [Malus domestica]
MD08G1107300	2.92991	1.9227	7.55774	27.4225	7.12563	15.6786	38.2179	40.6673	13.7929	Protein MIZU-KUSSEI 1 OS=Arabidopsis thaliana GN=MIZ1 PE=1 SV=1	PREDICTED: protein MIZU-KUSSEI 1 [Malus domestica]
MD12G1180500	0.558132	0.300722	0.717279	1.6147	1.44569	1.2203	2.41572	1.98769	3.27546	B2 protein OS=Daucus carota PE=2 SV=1	PREDICTED: uncharacterized protein LOC103450706 [Malus domestica]
MD02G1146300	0.329992	1.50142	0.537177	3.02316	1.91931	6.03825	1.99849	3.54706	3.38349	Zinc-finger homeodomain protein 6 OS=Arabidopsis thaliana GN=ZHD6 PE=1 SV=1	PREDICTED: zinc-finger homeodomain protein 6-like [Malus domestica]
MD01G1092800	3.47813	4.29399	3.59045	0.461448	2.12544	0.699225	0.73008	1.52475	0.869807	Protein NTM1-like 9 OS=Arabidopsis thaliana GN=NTL9 PE=1 SV=1	PREDICTED: uncharacterized protein LOC103423046 [Malus domestica]
MD16G1169000	27.0551	20.8639	47.8485	176.475	31.458	149.372	105.677	116.236	32.2142	Xyloglucan 6-xylosyltransferase 2 OS=Arabidopsis thaliana GN=XXT2 PE=1 SV=1	calmodulin binding transcription activator 1 [Malus domestica]
MD00G1186200	0.662507	0.565185	0.431384	2.24442	0.461078	8.91907	1.97093	1.90678	0.778346	Microtubule-associated protein RP/EB family member 1B OS=Arabidopsis thaliana GN=EB1B PE=1 SV=1	PREDICTED: microtubule-associated protein RP/EB family member 1A [Malus domestica]
novel.28	1.40768	1.05078	4.29652	0.377816	0.314898	0.435099	0.504776	0.279055	0.422848	#N/A	#N/A
MD02G1157400	14.968	1.76805	6.5225	0.197778	0	1.59435	0.2202	0	0	#N/A	#N/A
MD11G1101400	71.1846	31.0005	43.0163	14.1905	28.5858	12.9989	13.9945	10.7387	17.2836	Probable LRR receptor-like serine/threonine-protein kinase At3g47570 OS=Arabidopsis thaliana GN=At3g47570 PE=2 SV=1	PREDICTED: putative receptor-like protein kinase At3g47110 [Pyrus x bretschneideri]
MD03G1166900	2.17908	0.258191	1.15284	0.0779812	0.21665	0.239478	0.0289405	0.159991	0.14546	Protein LATERAL ROOT PRIMORDIUM 1 OS=Arabidopsis thaliana GN=LRP1 PE=1 SV=1	PREDICTED: protein LATERAL ROOT PRIMORDIUM 1 [Malus domestica]
MD11G1019900	4.75798	1.60225	2.8739	0.645235	0	0.681141	0.658517	1.39	0.300892	Accelerated cell death 11 OS=Arabidopsis thaliana GN=ACD11 PE=1 SV=1	PREDICTED: accelerated cell death 11-like [Malus domestica]
MD12G1189500	3.1492	4.0163	2.95157	10.4638	4.69652	7.61405	13.0189	7.33174	7.24677	#N/A	#N/A
MD16G1045500	2.2641	2.69031	3.23807	4.58363	6.29484	13.1165	17.2428	4.87302	5.82949	#N/A	#N/A
MD17G1210000	1.91343	1.89352	1.34558	0.657356	0.205457	0.302809	0.0731877	0.404603	0.367853	EPIDERMAL PATTERNING FACTOR-like protein 8 OS=Arabidopsis thaliana GN=EPFL8 PE=1 SV=1	PREDICTED: EPIDERMAL PATTERNING FACTOR-like protein 8 [Malus domestica]
MD04G1165100	0.898199	1.20046	2.07622	8.35723	1.47347	7.16642	8.70342	10.5726	1.81311	Protein trichome birefringence-like 35 OS=Arabidopsis thaliana GN=TBL35 PE=2 SV=1	PREDICTED: protein trichome birefringence-like 35 [Malus domestica]
MD05G1331300	4.31557	3.01223	2.31828	1.58369	1.08826	1.70739	0.806583	1.0992	0.622244	G-type lectin S-receptor-like serine/threonine-protein kinase At1g61390 OS=Arabidopsis thaliana GN=At1g61390 PE=3 SV=1	PREDICTED: G-type lectin S-receptor-like serine/threonine-protein kinase At1g61550 [Malus domestica]
MD10G1097200	15.0019	2.84637	20.301	53.1731	35.2069	54.6837	157.822	116.384	102.534	Probable cinnamyl alcohol dehydrogenase 2 OS=Eucalyptus gunnii GN=CAD2 PE=2 SV=1	PREDICTED: probable cinnamyl alcohol dehydrogenase 1 [Malus domestica]
MD06G1172200	2.11479	3.60826	3.16715	5.52972	5.38261	7.34425	7.41488	6.70772	5.24016	--	PREDICTED: uncharacterized protein LOC103437704 [Malus domestica]
MD01G1155000	0.64143	1.32892	3.49044	7.39787	4.01768	10.3775	9.63849	31.1471	11.3184	Transcription factor bHLH51 OS=Arabidopsis thaliana GN=BHLH51 PE=2 SV=1	PREDICTED: transcription factor bHLH51-like [Malus domestica]
MD02G1063700	1.06193	1.69862	1.94474	4.10427	3.91965	6.03948	5.58501	4.06996	3.70029	#N/A	#N/A
MD13G1049800	1.30591	1.16181	1.4577	0.400573	0.784584	0.49821	0.624377	0.355036	0.789038	Phosphate transporter PHO1 homolog 1 OS=Arabidopsis thaliana GN=PHO1-H1 PE=2 SV=1	PREDICTED: phosphate transporter PHO1 homolog 1-like [Malus domestica]
MD11G1125200	0.24543	0.628129	0.191771	0	0	0	0	0	0	LOB domain-containing protein 11 OS=Arabidopsis thaliana GN=LBD11 PE=2 SV=2	PREDICTED: LOB domain-containing protein 1-like [Malus domestica]
MD05G1197200	12.5441	13.3172	12.7964	3.59124	7.8987	2.29763	2.75443	3.14369	9.02105	--	PREDICTED: uncharacterized protein LOC103435590 [Malus domestica]
MD11G1148200	12.7792	29.2564	22.1352	45.3604	58.7824	37.5737	63.5819	44.3332	58.9722	Superoxide dismutase [Cu-Zn], chloroplastic OS=Solidago canadensis var. scabra GN=SODCP PE=2 SV=1	PREDICTED: superoxide dismutase [Cu-Zn], chloroplastic isoform X1 [Malus domestica]
MD07G1043300	9.39513	20.6687	11.4956	6.68	2.77147	6.02489	1.08597	0.727706	0.396966	WAT1-related protein At5g07050 OS=Arabidopsis thaliana GN=At5g07050 PE=2 SV=1	PREDICTED: WAT1-related protein At5g07050-like [Malus domestica]
MD15G1360900	2.48099	0.644163	1.05357	4.44699	5.01913	4.69446	10.9337	5.3602	4.14753	#N/A	#N/A
MD16G1175800	2.09217	3.43386	2.77641	0.917984	1.68894	0.787251	0.97856	0.456824	1.39901	Sodium/hydrogen exchanger 2 OS=Arabidopsis thaliana GN=NHX2 PE=2 SV=2	PREDICTED: sodium/hydrogen exchanger 2-like [Malus domestica]
MD01G1167300	47.5255	20.4737	76.4405	219.474	101.766	117.342	333.494	231.8	251.827	Probable chalcone--flavonone isomerase 3 OS=Arabidopsis thaliana GN=CHI3 PE=1 SV=1	PREDICTED: probable chalcone--flavonone isomerase 3 isoform X2 [Malus domestica]
MD15G1285100	140.432	286.376	191.446	480.421	400.066	354.513	446.098	464.408	540.245	Mitogen-activated protein kinase kinase kinase YODA OS=Arabidopsis thaliana GN=YDA PE=1 SV=1	PREDICTED: mitogen-activated protein kinase kinase kinase 3-like [Malus domestica]
MD09G1116600	19.3298	27.8136	17.558	6.55773	14.0966	5.76755	3.97404	7.97038	8.02063	GDSL esterase/lipase At2g42990 OS=Arabidopsis thaliana GN=At2g42990 PE=2 SV=1	PREDICTED: GDSL esterase/lipase At2g42990-like isoform X1 [Malus domestica]
MD02G1118100	10.9995	45.0257	22.6602	6.9861	11.4965	5.57686	1.85613	5.57038	3.99824	Dirigent protein 19 OS=Arabidopsis thaliana GN=DIR19 PE=2 SV=1	PREDICTED: dirigent protein 19-like [Malus domestica]
MD00G1039900	2.24846	6.35125	2.63531	1.2016	1.11774	1.33436	1.52893	1.00372	1.05664	B-box zinc finger protein 19 OS=Arabidopsis thaliana GN=BBX19 PE=2 SV=1	PREDICTED: B-box zinc finger protein 19-like isoform X1 [Pyrus x bretschneideri]
MD11G1172500	9.10315	5.09882	11.765	23.1394	17.6075	17.2801	35.7863	30.6234	31.3774	Transcription repressor OFP6 OS=Arabidopsis thaliana GN=OFP6 PE=1 SV=1	PREDICTED: transcription repressor OFP4-like [Pyrus x bretschneideri]
MD15G1072600	31.8662	16.186	43.502	92.4881	51.9151	81.4409	138.348	145.453	136.959	--	PREDICTED: acyl-CoA-binding domain-containing protein 3-like [Malus domestica]
MD12G1043000	8.3261	6.57388	11.8036	25.7308	12.731	19.8538	29.205	24.064	17.5605	--	PREDICTED: uncharacterized protein LOC103449577 [Malus domestica]
MD13G1084900	15.1977	17.9656	17.9976	65.1437	21.8588	37.0416	63.3661	34.1029	47.031	Probable galacturonosyltransferase-like 9 OS=Arabidopsis thaliana GN=GATL9 PE=2 SV=1	PREDICTED: probable galacturonosyltransferase-like 9 [Malus domestica]
MD04G1244200	3.20054	1.61474	3.29406	7.35982	4.92706	5.82066	9.60923	9.38741	11.8428	GDT1-like protein 3 OS=Arabidopsis thaliana GN=At5g36290 PE=2 SV=1	PREDICTED: GDT1-like protein 4 [Malus domestica]
MD00G1019900	4.43418	3.7828	3.12787	12.2715	7.93544	9.50256	15.3116	7.03218	10.8926	Probable WRKY transcription factor 19 OS=Arabidopsis thaliana GN=WRKY19 PE=3 SV=1	PREDICTED: protein SUPPRESSOR OF npr1-1, CONSTITUTIVE 1-like [Malus domestica]
MD15G1284800	2.84269	0.287183	1.4613	0.32125	0.234283	0.147983	0.0357669	0.276821	0.323586	--	PREDICTED: uncharacterized protein LOC103401439 [Malus domestica]
MD04G1039600	74.4075	44.1358	90.6969	41.1619	32.6843	26.411	26.8285	40.1501	33.1435	--	PREDICTED: histidine protein methyltransferase 1 homolog [Malus domestica]
MD07G1265800	1.04191	1.48142	2.88332	14.3179	3.41845	6.87028	12.62	7.71106	8.17912	Probable calcium-binding protein CML14 OS=Arabidopsis thaliana GN=CML14 PE=2 SV=1	PREDICTED: probable calcium-binding protein CML13 [Pyrus x bretschneideri]
MD15G1057600	4.1045	5.43189	6.37311	1.9208	2.00116	3.48719	2.21403	2.28105	2.57969	Cytochrome P450 711A1 OS=Arabidopsis thaliana GN=CYP711A1 PE=2 SV=1	PREDICTED: cytochrome P450 711A1-like [Malus domestica]
MD14G1154900	7.82778	3.87748	4.62427	20.2776	7.56919	16.796	19.377	24.0941	16.7478	Squamosa promoter-binding-like protein 13B OS=Arabidopsis thaliana GN=SPL13B PE=3 SV=1	PREDICTED: squamosa promoter-binding-like protein 13A isoform X1 [Malus domestica]
MD02G1073400	7.83963	5.74008	4.2807	1.64354	3.61793	1.40428	0.472223	2.15373	1.63176	Probable caffeoyl-CoA O-methyltransferase At4g26220 OS=Arabidopsis thaliana GN=At4g26220 PE=2 SV=1	PREDICTED: probable caffeoyl-CoA O-methyltransferase At4g26220 [Malus domestica]
novel.585	0.531409	0.755575	0.951558	4.48805	1.82278	2.19005	6.09783	4.30746	1.61757	#N/A	#N/A
MD12G1146600	4.73328	7.12445	3.58684	2.57	1.92295	2.6906	1.35264	2.12829	2.92862	L-type lectin-domain containing receptor kinase IV.1 OS=Arabidopsis thaliana GN=LECRK41 PE=2 SV=1	PREDICTED: L-type lectin-domain containing receptor kinase IV.1-like [Pyrus x bretschneideri]
MD15G1211600	1320.47	773.383	1272.25	304.738	661.549	155.752	180.015	503.617	555.849	Protein ALP1-like OS=Arabidopsis thaliana GN=At3g55350 PE=2 SV=1	PREDICTED: putative nuclease HARBI1 [Malus domestica]
MD03G1128900	26.6253	84.2907	55.2784	149.317	189.013	99.3346	241.574	180.626	200.841	Superoxide dismutase [Cu-Zn], chloroplastic OS=Solidago canadensis var. scabra GN=SODCP PE=2 SV=1	PREDICTED: superoxide dismutase [Cu-Zn], chloroplastic [Malus domestica]
novel.184	0.881792	0.192066	0.806279	2.56208	1.44376	2.35672	3.57015	2.06294	3.0478	#N/A	#N/A
MD16G1155100	0.769822	1.34631	1.16543	0.0330589	0.413304	0.0761423	0.11042	0.203478	0.147997	Pectinesterase inhibitor 11 OS=Arabidopsis thaliana GN=PMEI11 PE=2 SV=1	PREDICTED: probable pectinesterase/pectinesterase inhibitor 47 [Malus domestica]
MD11G1140000	1.57401	1.63624	2.02604	8.26341	1.58565	7.49548	9.86803	10.3596	1.58314	Helicase protein MOM1 OS=Arabidopsis thaliana GN=MOM1 PE=1 SV=1	PREDICTED: helicase protein MOM1-like isoform X1 [Malus domestica]
MD03G1223200	1.16288	0.721492	0.722777	4.35823	2.17569	2.61407	4.95339	3.68843	4.87769	#N/A	#N/A
MD01G1108000	18.0409	9.84104	27.55	98.1034	18.2876	90.4445	86.4582	70.0032	22.658	GATA transcription factor 8 OS=Arabidopsis thaliana GN=GATA8 PE=2 SV=1	PREDICTED: GATA transcription factor 8-like [Malus domestica]
MD02G1013800	1495.6	291.306	1125.58	161.172	12.4609	90.6028	113.571	451.114	227.343	EG45-like domain containing protein OS=Citrus jambhiri GN=CjBAp12 PE=1 SV=1	PREDICTED: EG45-like domain containing protein [Malus domestica]
MD13G1026300	0	0	0.0454971	0.400079	0.208409	0.783254	2.3608	1.23124	0.179106	U-box domain-containing protein 10 OS=Arabidopsis thaliana GN=PUB10 PE=2 SV=1	PREDICTED: LOW QUALITY PROTEIN: U-box domain-containing protein 10-like [Malus domestica]
MD11G1317200	3.65011	2.22422	2.32822	1.02366	0.799868	1.10519	0.498624	1.33889	1.07407	--	PREDICTED: uncharacterized protein LOC103422135 [Malus domestica]
MD04G1125700	6.64257	12.6048	10.4102	21.8877	14.3736	29.1782	30.3103	24.7006	17.8929	--	PREDICTED: uncharacterized protein LOC103433398 [Malus domestica]
MD14G1232400	64.8401	22.4658	85.0882	25.1203	12.5411	21.0127	11.4271	22.8901	9.00513	Probable S-adenosylmethionine-dependent methyltransferase At5g37990 OS=Arabidopsis thaliana GN=At5g37990 PE=3 SV=2	PREDICTED: probable S-adenosylmethionine-dependent methyltransferase At5g38780 [Pyrus x bretschneideri]
MD04G1102000	1.57586	1.28135	1.7556	5.73107	1.89481	4.65165	6.92231	5.41487	5.15973	L-type lectin-domain containing receptor kinase VIII.1 OS=Arabidopsis thaliana GN=LECRK81 PE=2 SV=1	PREDICTED: L-type lectin-domain containing receptor kinase VIII.1-like [Malus domestica]
MD00G1070100	0.866967	0.672372	0.500366	3.28306	0.775765	4.40447	2.26098	2.70819	0.871243	F-box protein CPR30 OS=Arabidopsis thaliana GN=CPR30 PE=1 SV=2	PREDICTED: F-box protein CPR30-like [Malus domestica]
MD07G1298200	8.46518	5.46438	13.8627	19.0002	19.8961	21.7135	24.8508	43.467	58.5597	Polyadenylate-binding protein-interacting protein 11 OS=Arabidopsis thaliana GN=CID11 PE=2 SV=1	PREDICTED: polyadenylate-binding protein-interacting protein 11-like [Malus domestica]
MD10G1316100	6.3469	6.24139	19.0553	54.6996	11.3864	63.9825	69.5709	60.3935	8.89588	Glucose-6-phosphate/phosphate translocator 2, chloroplastic OS=Arabidopsis thaliana GN=GPT2 PE=2 SV=2	PREDICTED: glucose-6-phosphate/phosphate translocator 2, chloroplastic isoform X2 [Malus domestica]
MD02G1232200	4.81489	5.25388	5.68704	2.93323	0.801559	1.82742	1.33842	1.30226	0.861072	#N/A	#N/A
MD15G1355100	3.11798	3.48114	6.13159	2.44429	0.88006	1.22116	0.720368	1.32747	1.66954	Sulfate transporter 1.3 OS=Arabidopsis thaliana GN=SULTR1;3 PE=2 SV=1	PREDICTED: sulfate transporter 1.2-like [Malus domestica]
MD16G1067000	0.261892	0.0394271	0.451397	1.16435	0.868443	1.2647	4.43409	2.94807	5.09405	Protein argonaute 7 OS=Arabidopsis thaliana GN=AGO7 PE=2 SV=1	PREDICTED: LOW QUALITY PROTEIN: protein argonaute 7-like [Malus domestica]
MD11G1071300	1.95311	0.882106	2.69311	0.197349	0.411212	0	0	0.242937	0.552179	--	PREDICTED: SAGA-associated factor 11 homolog [Pyrus x bretschneideri]
MD02G1299400	0.173794	0.259462	0.509239	2.16437	0.583169	1.67601	3.15758	2.6184	1.41999	Acyl-CoA--sterol O-acyltransferase 1 OS=Arabidopsis thaliana GN=ASAT1 PE=1 SV=1	PREDICTED: acyl-CoA--sterol O-acyltransferase 1-like [Malus domestica]
MD02G1037600	4.21119	3.92419	7.75161	20.2823	8.7248	11.1821	15.519	17.9464	9.466	--	PREDICTED: uncharacterized protein LOC103448416 [Malus domestica]
MD16G1030200	13.8807	10.9766	14.7834	36.2834	16.4382	29.8461	37.165	32.1077	25.177	Beta-glucuronosyltransferase GlcAT14A OS=Arabidopsis thaliana GN=GLCAT14A PE=2 SV=1	PREDICTED: beta-glucuronosyltransferase GlcAT14A-like [Malus domestica]
MD06G1011300	4.25602	7.48574	5.33724	1.9405	2.82096	3.06624	2.00976	1.72213	2.77788	--	PREDICTED: uncharacterized protein LOC103436755 [Malus domestica]
MD15G1038200	2.55599	6.04314	3.79818	2.05414	1.91137	1.39046	0.541201	0.926528	0.61423	Chaperone protein ClpB4, mitochondrial OS=Arabidopsis thaliana GN=CLPB4 PE=2 SV=1	PREDICTED: chaperone protein ClpB4, mitochondrial-like [Malus domestica]
MD02G1054900	0.338307	0.609287	0.367141	1.61423	1.34541	0.966667	1.61751	1.0333	1.58984	1-aminocyclopropane-1-carboxylate oxidase homolog 1 OS=Arabidopsis thaliana GN=At1g06620 PE=2 SV=1	PREDICTED: 1-aminocyclopropane-1-carboxylate oxidase homolog 3-like [Malus domestica]
MD16G1035900	0.365688	0.38996	0.505991	0.706677	1.60883	1.50707	2.79747	1.25655	2.66564	Putative zinc finger protein At1g68190 OS=Arabidopsis thaliana GN=At1g68190 PE=2 SV=1	PREDICTED: putative zinc finger protein At1g68190 [Malus domestica]
MD05G1222100	0	0	0	0.0833133	1.56238	1.05539	0.742065	0.923028	0.372973	LOB domain-containing protein 4 OS=Arabidopsis thaliana GN=LBD4 PE=2 SV=1	PREDICTED: LOB domain-containing protein 4-like [Malus domestica]
MD09G1054400	6.41469	6.87679	5.6369	1.85272	4.21603	3.01327	1.41135	2.88088	3.25582	Phosphate transporter PHO1 homolog 9 OS=Arabidopsis thaliana GN=PHO1-H9 PE=2 SV=1	PREDICTED: phosphate transporter PHO1 homolog 9-like [Malus domestica]
MD02G1315600	2.01923	1.95539	7.46236	22.7797	6.81217	13.7645	14.2466	36.639	13.1933	Transcription factor bHLH130 OS=Arabidopsis thaliana GN=BHLH130 PE=1 SV=1	PREDICTED: transcription factor bHLH130-like [Pyrus x bretschneideri]
MD17G1192600	5.73992	5.56446	8.9827	17.3665	9.16327	21.4189	20.5827	26.0676	9.969	#N/A	#N/A
MD12G1056900	1.7853	1.5529	3.00876	15.9046	1.25293	14.7151	11.7493	15.0633	0.841224	Actin OS=Gossypium hirsutum PE=3 SV=1	hypothetical protein AMTR_s00044p00088410 [Amborella trichopoda]
MD06G1200300	36.0195	24.4319	40.5617	108.098	49.3921	63.4389	158.026	90.5349	62.9266	Diacylglycerol kinase 1 OS=Arabidopsis thaliana GN=DGK1 PE=1 SV=2	PREDICTED: diacylglycerol kinase 1-like isoform X1 [Malus domestica]
MD15G1057800	6.83777	40.9815	13.923	4.42946	7.4666	4.75714	3.04762	1.16405	1.55963	Glutaredoxin-C6 OS=Arabidopsis thaliana GN=GRXC6 PE=2 SV=2	PREDICTED: glutaredoxin-C6-like [Malus domestica]
MD03G1081200	1.87156	2.96697	1.97191	0.556905	1.33183	0.976587	0.70459	0.966003	1.26073	--	PREDICTED: uncharacterized protein LOC103419334 [Malus domestica]
MD11G1278500	5.58046	3.64343	5.36112	13.32	6.95373	8.9437	16.4323	9.86566	8.99271	Protein SPIRRIG OS=Arabidopsis thaliana GN=SPI PE=1 SV=1	PREDICTED: protein SPIRRIG [Pyrus x bretschneideri]
MD09G1286600	2.29833	2.39642	1.09746	0.833454	0.502714	0.404134	0.341872	0.863985	0.687321	NifU-like protein 1, chloroplastic OS=Arabidopsis thaliana GN=NIFU1 PE=1 SV=1	PREDICTED: nifU-like protein 1, chloroplastic [Pyrus x bretschneideri]
MD08G1135100	28.8284	11.8328	45.1675	166.025	38.9136	99.0101	110.823	110.309	69.6999	E3 ubiquitin-protein ligase MIEL1 OS=Arabidopsis thaliana GN=MIEL1 PE=1 SV=1	PREDICTED: E3 ubiquitin-protein ligase MIEL1-like [Pyrus x bretschneideri]
MD07G1304200	1.81351	1.62644	1.77127	2.51607	4.11925	5.51915	4.53545	6.78454	5.81072	--	PREDICTED: VAN3-binding protein-like isoform X1 [Malus domestica]
MD12G1245100	3.74658	1.61922	4.48145	9.59678	5.96648	8.27661	21.8745	13.611	14.8021	Protein EIN4 OS=Arabidopsis thaliana GN=EIN4 PE=1 SV=1	PREDICTED: protein EIN4 [Malus domestica]
MD10G1050200	86.7717	57.6831	118.24	257.926	113.752	257.475	367.499	191.736	103.034	Protein EXORDIUM-like 2 OS=Arabidopsis thaliana GN=EXL2 PE=2 SV=1	PREDICTED: protein EXORDIUM-like 2 [Malus domestica]
MD08G1124900	4.1718	2.86265	3.41029	9.89231	4.95021	7.49011	10.1465	8.62968	6.10233	Trihelix transcription factor ASR3 OS=Arabidopsis thaliana GN=ASR3 PE=1 SV=1	PREDICTED: trihelix transcription factor ASR3-like [Pyrus x bretschneideri]
MD13G1086100	9.13352	6.08806	8.11453	23.0533	10.198	16.8035	33.0255	23.5925	18.0197	Chaperone protein dnaJ 16 OS=Arabidopsis thaliana GN=ATJ16 PE=2 SV=1	PREDICTED: chaperone protein dnaJ 16 [Malus domestica]
MD11G1024000	5.34409	7.00139	6.6488	4.12543	1.87861	2.92606	2.52469	2.52239	2.26271	Beta-glucosidase 12 OS=Oryza sativa subsp. indica GN=BGLU12 PE=3 SV=1	PREDICTED: beta-glucosidase 12-like [Pyrus x bretschneideri]
MD16G1246100	9.85502	6.23424	12.1678	22.8103	13.8502	21.1471	28.2712	24.6946	19.4813	Calcium-transporting ATPase 10, plasma membrane-type OS=Arabidopsis thaliana GN=ACA10 PE=1 SV=2	PREDICTED: calcium-transporting ATPase 10, plasma membrane-type-like isoform X1 [Pyrus x bretschneideri]
MD15G1161000	4.20776	6.02665	3.20486	2.02247	2.48705	1.75638	0.627537	1.46931	1.41007	Probable E3 ubiquitin-protein ligase HIP1 OS=Oryza sativa subsp. japonica GN=HIP1 PE=1 SV=2	PREDICTED: uncharacterized protein LOC103421570 isoform X1 [Malus domestica]
MD13G1036700	7.24673	1.98441	4.89339	2.25396	1.01402	0.766911	1.16919	2.36474	1.57663	Rust resistance kinase Lr10 OS=Triticum aestivum GN=LRK10 PE=2 SV=1	PREDICTED: rust resistance kinase Lr10-like isoform X2 [Malus domestica]
MD01G1209100	366.864	143.175	325.621	68.0133	149.911	31.8083	48.1942	73.5009	119.144	Heavy metal-associated isoprenylated plant protein 39 OS=Arabidopsis thaliana GN=HIPP39 PE=2 SV=1	PREDICTED: heavy metal-associated isoprenylated plant protein 3-like isoform X1 [Malus domestica]
MD09G1031100	1.1091	2.87967	0.926276	4.19686	4.02726	4.76958	4.87246	4.84344	4.57348	Serine/threonine-protein kinase ATM OS=Arabidopsis thaliana GN=ATM PE=2 SV=1	PREDICTED: uncharacterized protein LOC103442246 [Malus domestica]
MD06G1124600	0.597163	0.744566	1.21137	1.65702	2.26069	2.99867	2.45982	1.89409	3.57657	Heavy metal-associated isoprenylated plant protein 30 OS=Arabidopsis thaliana GN=HIPP30 PE=1 SV=1	PREDICTED: heavy metal-associated isoprenylated plant protein 21 [Malus domestica]
novel.471	1.47122	1.77444	1.93245	0.435719	0.817107	0.652315	0.485114	0.590007	0.536417	#N/A	#N/A
MD10G1063000	0.995794	1.22117	0.9726	0.106907	0.38983	0.0615581	0.238054	0.197404	0.179474	--	PREDICTED: uncharacterized protein LOC103412090 isoform X2 [Malus domestica]
MD06G1020400	0	0	0	0.0986747	0.479747	0.227271	1.06199	0.607343	1.17798	Methanol O-anthraniloyltransferase OS=Vitis labrusca GN=AMAT PE=1 SV=1	PREDICTED: methanol O-anthraniloyltransferase-like [Malus domestica]
MD05G1163300	4.57512	5.05099	6.25598	17.798	6.26116	15.226	25.7347	17.6413	7.91602	--	PREDICTED: dCTP pyrophosphatase 1-like [Malus domestica]
MD04G1067800	1.33242	0.426259	1.57251	0.286095	0.0496773	0	0.371616	0.117394	0.0533657	Dehydration-responsive element-binding protein 1D OS=Arabidopsis thaliana GN=DREB1D PE=2 SV=1	DREB1b transcription factor [Malus sieversii]
MD02G1317900	6.28012	7.62423	7.1633	37.1532	4.85318	37.2044	33.9949	23.0767	5.38237	Uncharacterized protein At1g04910 OS=Arabidopsis thaliana GN=At1g04910 PE=2 SV=1	PREDICTED: uncharacterized protein At1g04910-like [Malus domestica]
MD15G1073900	112.714	135.802	206.272	353.395	204.948	415.731	446.008	306.502	279.584	Peamaclein OS=Prunus persica PE=1 SV=1	PREDICTED: peamaclein [Malus domestica]
MD15G1385200	27.8313	16.644	40.5824	93.1028	44.0717	66.8449	92.9046	96.1817	77.8255	Mechanosensitive ion channel protein 3, chloroplastic OS=Arabidopsis thaliana GN=MSL3 PE=1 SV=1	PREDICTED: mechanosensitive ion channel protein 3, chloroplastic-like isoform X2 [Malus domestica]
MD12G1256200	0.0401241	0.0342299	0.0391895	0.689228	0.251322	0.396863	0.652258	0.296954	0.65567	Receptor-like protein kinase FERONIA OS=Arabidopsis thaliana GN=FER PE=1 SV=1	PREDICTED: receptor-like protein kinase FERONIA [Malus domestica]
MD11G1262700	0	0	0	0.399027	0.242504	0.114881	0.481284	0.204667	0.148862	Epidermis-specific secreted glycoprotein EP1 OS=Daucus carota GN=EP1 PE=1 SV=1	epidermis-specific secreted glycoprotein EP1-like precursor [Malus domestica]
MD08G1178500	12.9014	26.8783	18.8351	7.69814	6.19744	11.2831	8.96043	6.17403	11.096	--	PREDICTED: uncharacterized protein LOC103962220 [Pyrus x bretschneideri]
MD10G1249500	3.67976	3.10393	2.30181	1.38491	1.66483	0.858785	0.553507	1.26769	0.794862	Wall-associated receptor kinase 5 OS=Arabidopsis thaliana GN=WAK5 PE=2 SV=1	PREDICTED: wall-associated receptor kinase 5-like, partial [Malus domestica]
MD15G1111000	0.869936	1.39698	1.49942	2.681	2.88474	2.73318	3.86573	2.65107	2.55784	--	PREDICTED: protein starmaker-like [Malus domestica]
MD14G1022500	8.7738	18.8036	11.4956	3.85968	3.73393	7.51394	3.17176	4.52501	4.93681	Protein BIC1 OS=Arabidopsis thaliana GN=BIC1 PE=1 SV=1	PREDICTED: uncharacterized protein LOC103452045 [Malus domestica]
MD12G1086600	1.45693	0.658011	0.920763	2.94427	1.61041	10.8502	2.8683	2.89952	2.80092	--	unnamed protein product [Coffea canephora]
MD12G1130800	0.567933	0.456818	0.23773	0.167239	0.0580787	0.0481488	0.031033	0.120092	0.124782	Probable LRR receptor-like serine/threonine-protein kinase At3g47570 OS=Arabidopsis thaliana GN=At3g47570 PE=2 SV=1	PREDICTED: probable LRR receptor-like serine/threonine-protein kinase At3g47570 [Malus domestica]
MD08G1061600	2.57876	7.36134	4.1171	1.44815	1.95249	1.86392	1.18553	1.67781	1.90677	Putative GATA transcription factor 22 OS=Arabidopsis thaliana GN=GATA22 PE=3 SV=1	PREDICTED: GATA transcription factor 21-like [Malus domestica]
MD15G1295800	11.2769	3.9764	4.77283	2.5182	2.859	2.26795	1.86912	2.02686	2.16796	Cyclin-D5-1 OS=Arabidopsis thaliana GN=CYCD5-1 PE=2 SV=2	PREDICTED: cyclin-D5-1-like [Malus domestica]
MD17G1159100	0.340056	0.580204	0.41517	2.40953	1.14106	1.8499	2.43881	2.51672	0.898908	Probable histone H2A.4 OS=Arabidopsis thaliana GN=At5g02560 PE=1 SV=1	PREDICTED: histone H2A.1-like [Malus domestica]
MD02G1022400	1.36555	0.776633	1.30199	0.251321	0.436392	0.482375	0.497443	0.446876	0.21877	Heptahelical transmembrane protein 1 OS=Arabidopsis thaliana GN=HHP1 PE=1 SV=1	PREDICTED: heptahelical transmembrane protein 1-like [Pyrus x bretschneideri]
MD04G1179200	92.0124	53.4198	95.2522	28.5356	53.3031	23.274	18.8007	47.8144	39.564	Unknown protein 1 OS=Helianthus annuus PE=1 SV=1	PREDICTED: uncharacterized protein LOC103419419 [Malus domestica]
MD01G1050800	82.5003	60.7758	116.874	206.153	121.846	203.95	181.389	254.896	203.838	F-box protein PP2-A13 OS=Arabidopsis thaliana GN=PP2A13 PE=1 SV=1	PREDICTED: F-box protein PP2-A13 isoform X2 [Pyrus x bretschneideri]
MD15G1335800	6.20573	10.5882	6.54128	4.53835	2.03424	3.16017	1.64511	1.68901	2.12621	--	hypothetical protein PRUPE_6G166900 [Prunus persica]
MD14G1086200	0.126859	0	0.0619523	0.926124	0.227028	1.56844	1.03111	0.670623	0.365827	#N/A	#N/A
MD05G1016600	2.92887	1.04109	2.90833	0.377328	0.78623	0.820793	0.233391	0.619322	0.234612	--	PREDICTED: uncharacterized protein LOC103437232 isoform X2 [Malus domestica]
MD12G1136300	4.18464	1.70503	1.22005	0.107285	0.670644	0.617758	0.238896	0.594308	0.240146	--	PREDICTED: uncharacterized protein LOC103423410 [Malus domestica]
MD16G1061500	3.02566	3.05734	4.73404	2.14452	0.630844	1.01692	1.60112	1.73923	1.01652	Ureide permease 2 OS=Arabidopsis thaliana GN=UPS2 PE=1 SV=2	PREDICTED: ureide permease 2-like isoform X1 [Malus domestica]
MD15G1068900	2.03952	1.63117	0.964882	0.520031	0.741394	0.315198	0.487566	0.707544	0.459484	Probable pre-mRNA-splicing factor ATP-dependent RNA helicase DEAH5 OS=Arabidopsis thaliana GN=At3g26560 PE=1 SV=2	probable pre-mRNA-splicing factor ATP-dependent RNA helicase DEAH5 [Hevea brasiliensis]
MD09G1265400	1.24176	1.42781	1.16011	0.625996	0.362326	0.640806	0.309761	0.428112	0.363278	Transcription repressor KAN1 OS=Arabidopsis thaliana GN=KAN1 PE=1 SV=1	PREDICTED: transcription repressor KAN1 [Malus domestica]
MD16G1042400	10.6989	16.3309	20.7266	53.0073	21.1247	38.1306	111.776	69.3652	50.0609	--	PREDICTED: uncharacterized protein LOC103402697 [Malus domestica]
MD16G1015200	31.7539	26.7433	41.8277	140.461	34.2801	99.9183	116.636	89.8553	39.9049	Receptor-like kinase TMK3 OS=Arabidopsis thaliana GN=TMK3 PE=2 SV=1	PREDICTED: receptor protein kinase TMK1 isoform X1 [Pyrus x bretschneideri]
MD17G1218200	0.124547	0.0796886	0.18247	1.12319	0.250752	0.739131	3.98974	3.98333	2.27468	Putative UPF0481 protein At3g02645 OS=Arabidopsis thaliana GN=At3g02645 PE=3 SV=1	PREDICTED: putative UPF0481 protein At3g02645 [Malus domestica]
MD07G1198700	171.473	81.9113	275.225	521.411	380.455	392.955	458.073	492.683	474.038	Glucan endo-1,3-beta-glucosidase OS=Triticum aestivum GN=GLC1 PE=2 SV=1	PREDICTED: glucan endo-1,3-beta-glucosidase-like [Malus domestica]
MD05G1016700	15.3	9.90522	32.1498	53.57	37.924	51.6787	36.0428	76.6482	48.7392	GDP-mannose transporter GONST1 OS=Arabidopsis thaliana GN=GONST1 PE=1 SV=2	PREDICTED: GDP-mannose transporter GONST1 [Malus domestica]
MD15G1438300	22.6124	27.0275	26.5147	15.163	7.24949	15.0699	7.86283	12.2733	7.09033	--	PREDICTED: uncharacterized protein LOC103431793 [Malus domestica]
MD01G1184300	0.920576	0.453754	0.579442	0.245982	0.219663	0.0809361	0.0586859	0.108144	0.2753	Cadmium/zinc-transporting ATPase HMA2 OS=Arabidopsis thaliana GN=HMA2 PE=2 SV=1	PREDICTED: putative inactive cadmium/zinc-transporting ATPase HMA3 [Malus domestica]
MD06G1094500	30.0379	3.85451	17.2434	1.50911	0	0.579307	0.240028	4.33468	1.4477	--	PREDICTED: uncharacterized protein LOC103441150 [Malus domestica]
MD01G1059700	3.74536	14.1903	7.25169	3.65199	2.46424	3.07255	0.695223	4.19279	1.4189	Rust resistance kinase Lr10 OS=Triticum aestivum GN=LRK10 PE=2 SV=1	PREDICTED: LEAF RUST 10 DISEASE-RESISTANCE LOCUS RECEPTOR-LIKE PROTEIN KINASE-like 2.1 [Pyrus x bretschneideri]
MD06G1127200	0.672933	4.08609	2.0491	0.577962	0.566723	0.548134	0.0757039	0.209256	0.3805	WAT1-related protein At5g07050 OS=Arabidopsis thaliana GN=At5g07050 PE=2 SV=1	PREDICTED: WAT1-related protein At1g43650-like [Pyrus x bretschneideri]
MD15G1411800	7.12227	6.03918	9.10653	22.4294	10.1196	14.8149	53.5765	17.6616	20.4971	Non-specific lipid-transfer protein-like protein At5g64080 OS=Arabidopsis thaliana GN=At5g64080 PE=1 SV=1	PREDICTED: non-specific lipid-transfer protein-like protein At5g64080 [Malus domestica]
MD02G1247200	3.31381	1.73032	2.06474	0.760604	1.17586	1.13022	0.355122	1.14773	0.988561	Rust resistance kinase Lr10 OS=Triticum aestivum GN=LRK10 PE=2 SV=1	PREDICTED: rust resistance kinase Lr10-like [Malus domestica]
MD07G1097400	1.73554	0.153164	1.2275	10.023	1.92782	5.09061	9.27078	9.17465	3.85427	Cyclin-U4-1 OS=Arabidopsis thaliana GN=CYCU4-1 PE=1 SV=1	PREDICTED: cyclin-U4-1-like [Malus domestica]
MD16G1017800	1.59219	1.15855	1.00625	0.361982	0.544738	0.185273	0.492577	0.297066	0.540168	Phosphatidylinositol/phosphatidylcholine transfer protein SFH4 OS=Arabidopsis thaliana GN=SFH4 PE=2 SV=1	PREDICTED: SEC14 cytosolic factor-like isoform X1 [Malus domestica]
MD04G1008900	124.38	45.0517	124.273	44.4944	43.9379	38.564	27.6854	42.9365	22.19	Ubiquitin-conjugating enzyme E2 11 OS=Arabidopsis thaliana GN=UBC11 PE=1 SV=2	PREDICTED: ubiquitin-conjugating enzyme E2 4-like isoform X2 [Pyrus x bretschneideri]
MD14G1246200	47.7413	13.7995	67.3485	15.0042	17.3275	10.788	4.50775	17.3952	6.21948	Putative GEM-like protein 8 OS=Arabidopsis thaliana GN=At5g23370 PE=3 SV=1	PREDICTED: putative GEM-like protein 8 [Malus domestica]
MD09G1090400	11.2943	4.7677	7.30845	11.5279	23.853	19.1503	21.1304	33.6229	46.7076	--	PREDICTED: uncharacterized protein LOC103411248 [Malus domestica]
MD08G1038600	86.846	49.2035	156.714	356.359	164.715	246.765	389.332	346.859	257.936	Allene oxide synthase 1, chloroplastic OS=Solanum lycopersicum GN=AOS1 PE=2 SV=1	PREDICTED: allene oxide synthase 1, chloroplastic-like [Malus domestica]
MD07G1256300	0	0.0112313	0.0771516	0.226145	0.200265	0.234389	0.352494	0.403657	0.202479	Probable serine/threonine protein kinase IRE OS=Arabidopsis thaliana GN=IRE PE=2 SV=1	PREDICTED: LOW QUALITY PROTEIN: probable serine/threonine protein kinase IRE [Malus domestica]
MD05G1158400	2.33025	1.81947	1.54303	6.7165	2.19114	6.79728	8.3088	9.68778	6.49199	--	PREDICTED: uncharacterized protein LOC103433319 [Malus domestica]
MD05G1165800	0.187298	0.727906	0.833374	4.43272	0.633137	3.10816	9.15407	4.33454	0.960205	Transcription factor bHLH62 OS=Arabidopsis thaliana GN=BHLH62 PE=2 SV=1	PREDICTED: transcription factor bHLH62-like [Malus domestica]
MD05G1334000	3.12476	3.50402	2.01546	0.793315	1.84645	0.758089	0.394643	0.955793	1.19012	G-type lectin S-receptor-like serine/threonine-protein kinase At1g11410 OS=Arabidopsis thaliana GN=At1g11410 PE=3 SV=3	PREDICTED: G-type lectin S-receptor-like serine/threonine-protein kinase At1g11410 [Malus domestica]
MD16G1000500	355.81	204.277	374.1	209.603	108.495	118.526	118.365	165.767	177.528	Anamorsin homolog OS=Vitis vinifera GN=VIT_01s0010g01180 PE=3 SV=1	PREDICTED: anamorsin homolog [Malus domestica]
MD04G1096300	30.0331	19.389	16.847	7.66865	9.98686	12.8456	8.34396	8.79647	8.58268	--	PREDICTED: transmembrane protein 40-like [Malus domestica]
MD03G1045200	2.90782	3.36661	5.07158	0.535165	1.30096	0.82174	0	0.439192	1.1979	Putative 4-hydroxy-4-methyl-2-oxoglutarate aldolase 3 OS=Arabidopsis thaliana GN=At5g56260 PE=1 SV=1	PREDICTED: putative 4-hydroxy-4-methyl-2-oxoglutarate aldolase 3 [Malus domestica]
MD02G1247800	14.0208	0.0584899	1.74108	0	0.0920237	0	0.163903	0	0.131808	Cytochrome P450 77A3 OS=Glycine max GN=CYP77A3 PE=2 SV=1	PREDICTED: cytochrome P450 77A3-like [Malus domestica]
MD03G1297400	99.9427	43.4664	78.6298	29.8408	45.3069	21.3734	26.7917	29.5104	37.114	--	PREDICTED: uncharacterized protein LOC103432643 [Malus domestica]
MD09G1121400	2.66341	4.28463	2.11826	4.8038	6.97945	7.63961	13.3164	5.02847	5.08377	Probable serine/threonine-protein kinase WNK11 OS=Arabidopsis thaliana GN=WNK11 PE=2 SV=1	PREDICTED: probable serine/threonine-protein kinase WNK11 [Malus domestica]
MD15G1087900	1.05176	0.44863	0.36688	2.58094	1.14279	4.23546	5.4597	8.26055	3.46627	Protein MIZU-KUSSEI 1 OS=Arabidopsis thaliana GN=MIZ1 PE=1 SV=1	PREDICTED: protein MIZU-KUSSEI 1-like [Pyrus x bretschneideri]
MD09G1199400	0.0673839	0.0574853	0.131629	0.347245	1.02502	0.999731	0.64435	0.783673	0.518177	--	receptor-like serine/threonine-protein kinase At4g25390 [Prunus avium]
MD04G1111400	0.950876	0.689513	1.67171	7.63595	1.1061	4.98466	6.31937	4.77533	2.83346	Glutathione S-transferase L3 OS=Arabidopsis thaliana GN=GSTL3 PE=2 SV=1	PREDICTED: glutathione S-transferase L3-like isoform X2 [Pyrus x bretschneideri]
MD17G1179500	0.249437	0.390124	0.162418	0.999759	0.669591	1.2747	1.55038	2.3735	2.51757	Inositol oxygenase 1 OS=Arabidopsis thaliana GN=MIOX1 PE=2 SV=1	PREDICTED: inositol oxygenase 1-like isoform X1 [Pyrus x bretschneideri]
MD01G1137700	2.08599	1.1502	1.86348	3.05882	2.9364	5.28388	9.41401	5.02951	7.72711	L-type lectin-domain containing receptor kinase S.4 OS=Arabidopsis thaliana GN=LECRKS4 PE=2 SV=1	PREDICTED: L-type lectin-domain containing receptor kinase S.4-like [Malus domestica]
MD11G1077100	14.5106	7.42741	9.80274	4.88124	3.57064	5.62132	2.19697	4.09111	3.71952	Pleckstrin homology domain-containing protein 1 OS=Arabidopsis thaliana GN=PH1 PE=2 SV=2	PREDICTED: pleckstrin homology domain-containing protein 1-like [Malus domestica]
MD05G1230800	0.106739	0.0910589	0.0625516	0.421704	0.19102	0.65456	0.449097	0.383696	0.266764	G-type lectin S-receptor-like serine/threonine-protein kinase At4g27290 OS=Arabidopsis thaliana GN=At4g27290 PE=3 SV=4	PREDICTED: G-type lectin S-receptor-like serine/threonine-protein kinase At4g27290 isoform X1 [Malus domestica]
MD07G1233400	29.9159	25.054	60.537	122.281	57.3457	97.2702	201.093	128.254	120.453	Probable chalcone--flavonone isomerase 3 OS=Arabidopsis thaliana GN=CHI3 PE=1 SV=1	PREDICTED: probable chalcone--flavonone isomerase 3 isoform X1 [Malus domestica]
MD14G1006800	7.42483	11.8237	8.46054	3.7199	5.09355	4.65108	5.32492	2.48585	4.40117	#N/A	#N/A
MD07G1248400	3.30752	4.64086	4.33564	23.137	3.03746	17.9498	29.0475	16.4264	9.28695	--	PREDICTED: ethylene-responsive transcription factor 2-like [Malus domestica]
MD09G1285100	0.286387	0.167968	0.314682	0.415074	1.58561	0.725861	3.49164	0.738048	0.757039	Stachyose synthase OS=Pisum sativum GN=STS1 PE=1 SV=1	PREDICTED: stachyose synthase [Malus domestica]
MD04G1135500	5.52737	13.0201	7.09074	3.89704	3.46952	3.67191	0.946652	1.83168	3.96502	Ultraviolet-B receptor UVR8 OS=Arabidopsis thaliana GN=UVR8 PE=1 SV=1	PREDICTED: ultraviolet-B receptor UVR8-like isoform X3 [Pyrus x bretschneideri]
MD03G1172800	0.0363014	0.0619375	0.106368	0.592386	0.292344	0.46677	0.62483	0.805989	0.767676	Cinnamoyl-CoA reductase 1 OS=Arabidopsis thaliana GN=CCR1 PE=1 SV=1	PREDICTED: cinnamoyl-CoA reductase 1 [Malus domestica]
MD05G1236200	15.6753	7.34597	14.2286	43.1277	17.7678	27.0616	54.5895	47.0948	43.9001	Putative cyclin-B3-1 OS=Arabidopsis thaliana GN=CYCB3-1 PE=3 SV=2	PREDICTED: putative cyclin-B3-1 [Pyrus x bretschneideri]
MD10G1161600	6.49138	22.5288	11.9599	3.29447	5.01644	5.69095	3.52687	3.11961	2.26901	Small ubiquitin-related modifier 2 OS=Arabidopsis thaliana GN=SUMO2 PE=1 SV=1	PREDICTED: small ubiquitin-related modifier 1-like [Malus domestica]
MD13G1059500	1.59269	0.990258	1.95109	0.208665	0.24155	0.827708	0.516268	0.656438	0.207588	Squamosa promoter-binding-like protein 6 OS=Arabidopsis thaliana GN=SPL6 PE=2 SV=2	PREDICTED: squamosa promoter-binding-like protein 6 [Malus domestica]
MD05G1304000	0.89243	0.496521	1.06113	0.266602	0.138878	0.230268	0.259723	0	0.186487	GDSL esterase/lipase At1g28600 OS=Arabidopsis thaliana GN=At1g28600 PE=2 SV=1	PREDICTED: GDSL esterase/lipase At1g28580-like [Pyrus x bretschneideri]
MD04G1090700	14.6071	13.5661	9.76422	2.64704	8.25018	5.04647	3.71486	3.28589	5.60144	ACT domain-containing protein ACR10 OS=Arabidopsis thaliana GN=ACR10 PE=2 SV=1	PREDICTED: ACT domain-containing protein ACR10-like [Malus domestica]
MD12G1242500	5.2654	5.31103	3.47893	6.88986	23.4189	8.33273	10.2477	6.90957	13.6656	E3 ubiquitin protein ligase DRIP2 OS=Arabidopsis thaliana GN=DRIP2 PE=1 SV=1	PREDICTED: E3 ubiquitin protein ligase DRIP2-like isoform X1 [Malus domestica]
MD07G1264100	0.158479	0	0	0.544453	0.482147	0.47025	1.3942	0.737244	1.94991	Protein DETOXIFICATION 49 OS=Arabidopsis thaliana GN=DTX49 PE=2 SV=1	PREDICTED: protein DETOXIFICATION 49-like [Malus domestica]
MD15G1262300	9.29971	4.8634	4.7904	1.99681	3.73324	1.13403	1.40091	2.02034	1.62254	Phosphatidylinositol/phosphatidylcholine transfer protein SFH8 OS=Arabidopsis thaliana GN=SFH8 PE=2 SV=1	PREDICTED: random slug protein 5-like [Pyrus x bretschneideri]
MD07G1029000	0.327274	0.961679	0.443959	0.124927	0.2115	0.143868	0.0869308	0.0576694	0.139817	Putative disease resistance protein At1g50180 OS=Arabidopsis thaliana GN=At1g50180 PE=3 SV=2	PREDICTED: probable disease resistance protein RF9 isoform X1 [Malus domestica]
MD06G1107900	3.63792	2.73839	1.56758	0.183794	1.05316	0.529151	0.20463	0.113125	0.514251	Valine--tRNA ligase, mitochondrial 1 OS=Arabidopsis thaliana GN=TWN2 PE=2 SV=2	valine--tRNA ligase, mitochondrial 1-like isoform X2 [Prunus avium]
MD01G1049700	0.897691	0.401144	1.12729	2.12943	1.98902	2.07176	2.37083	3.25406	2.09561	E3 ubiquitin-protein ligase At4g11680 OS=Arabidopsis thaliana GN=At4g11680 PE=2 SV=1	PREDICTED: E3 ubiquitin-protein ligase At4g11680 [Prunus mume]
MD11G1111600	11.8064	6.47085	15.751	30.5337	24.1682	18.5601	56.3854	53.2076	68.5363	--	PREDICTED: uncharacterized protein LOC103447724 [Malus domestica]
MD14G1037300	1304.82	928.397	1007.5	441.648	685.014	188.803	252.787	559.644	675.181	NDR1/HIN1-like protein 3 OS=Arabidopsis thaliana GN=NHL3 PE=1 SV=1	PREDICTED: NDR1/HIN1-Like protein 3-like [Malus domestica]
MD12G1076700	1.67582	2.0946	1.4084	0.769866	0.802075	0.770948	0.63354	0.576864	0.786702	ABC transporter G family member 15 OS=Arabidopsis thaliana GN=ABCG15 PE=2 SV=2	PREDICTED: ABC transporter G family member 12-like [Malus domestica]
MD08G1166700	0.172333	0.343041	0.196373	0.592048	0.745322	0.880674	0.933818	0.576976	0.690223	Phosphatidylinositol 4-phosphate 5-kinase 1 OS=Arabidopsis thaliana GN=PIP5K1 PE=1 SV=1	PREDICTED: uncharacterized protein LOC103450656 [Malus domestica]
MD16G1089300	2.62197	3.42976	3.75598	0.300258	1.09487	1.03734	0.501445	0.184809	0.840114	Transcription factor PAR2 OS=Arabidopsis thaliana GN=PAR2 PE=3 SV=1	transcription factor PAR1 [Prunus avium]
MD17G1091300	2.36004	0.585277	1.63499	5.98664	3.87977	3.20287	24.8244	10.271	16.302	Probable terpene synthase 9 OS=Ricinus communis GN=TPS9 PE=3 SV=1	PREDICTED: probable terpene synthase 9 [Malus domestica]
MD06G1229600	11.1354	33.6803	19.6559	5.94696	10.2538	10.1728	4.99489	5.95075	4.04796	Myb-related protein 308 OS=Antirrhinum majus GN=MYB308 PE=2 SV=1	PREDICTED: transcription repressor MYB6-like [Malus domestica]
MD02G1095500	4.22229	2.30657	2.36946	1.55872	1.59079	0.915837	1.00938	1.48803	1.12146	Pollen receptor-like kinase 3 OS=Arabidopsis thaliana GN=PRK3 PE=1 SV=1	PREDICTED: pollen receptor-like kinase 3 [Pyrus x bretschneideri]
MD03G1273500	0.991006	0.814116	1.61321	3.40458	1.93773	2.65015	8.28304	1.59104	2.18744	Probable E3 ubiquitin-protein ligase XBOS32 OS=Oryza sativa subsp. japonica GN=XBOS32 PE=2 SV=2	PREDICTED: tankyrase-2-like [Malus domestica]
MD00G1112400	0	0	0.0361496	0.286095	0.165591	0.402687	0.460096	0.27392	0.925005	Scarecrow-like protein 32 OS=Arabidopsis thaliana GN=SCL32 PE=2 SV=1	PREDICTED: scarecrow-like protein 32 [Malus domestica]
MD05G1134000	1.18829	0.54307	1.28496	2.18697	2.16455	2.98029	1.9885	2.82677	2.24367	--	uncharacterized protein LOC110744412 [Prunus avium]
MD03G1198600	0.0483687	0.0412634	0.0472421	0.747765	0.0865611	1.0525	1.1563	2.19897	0.0929879	GDSL esterase/lipase At5g55050 OS=Arabidopsis thaliana GN=At5g55050 PE=2 SV=1	PREDICTED: GDSL esterase/lipase At5g55050-like [Malus domestica]
MD10G1019800	13.9672	7.72122	5.2385	4.12664	3.59941	2.76297	2.24381	3.78039	4.40368	L-type lectin-domain containing receptor kinase S.6 OS=Arabidopsis thaliana GN=LECRKS6 PE=2 SV=1	PREDICTED: LOW QUALITY PROTEIN: L-type lectin-domain containing receptor kinase S.6-like [Malus domestica]
MD11G1195900	109.542	34.4762	32.7325	22.7445	26.0481	14.9488	12.3787	26.5395	19.9601	--	PREDICTED: uncharacterized protein LOC103439362 [Malus domestica]
MD09G1248000	1.15678	0.986845	1.21053	0.212897	0	0.326901	0.158022	0.262077	0	GPI-anchored protein LLG1 OS=Arabidopsis thaliana GN=LLG1 PE=1 SV=1	PREDICTED: GPI-anchored protein LORELEI-like [Malus domestica]
MD13G1212200	1.42154	2.38631	2.37376	1.024	0.861676	0.725692	0.745438	0.290894	0.66118	CASP-like protein 5B3 OS=Arabidopsis thaliana GN=At3g23200 PE=2 SV=1	PREDICTED: CASP-like protein 5B3 isoform X1 [Malus domestica]
MD11G1216400	1.72943	2.32833	2.69208	8.03021	2.92574	4.89113	13.5142	9.17094	4.00014	Probable beta-1,3-galactosyltransferase 2 OS=Arabidopsis thaliana GN=B3GALT2 PE=2 SV=1	PREDICTED: probable beta-1,3-galactosyltransferase 2, partial [Malus domestica]
MD04G1022200	0.523761	0.392331	0.449176	0.153605	0.251478	0.126353	0.183234	0.202594	0.221031	Protein PRD1 OS=Arabidopsis thaliana GN=PRD1 PE=1 SV=3	PREDICTED: protein PRD1 [Malus domestica]
MD13G1027100	0.722703	0.506442	0.932756	1.37443	1.66288	1.50622	2.46812	1.69192	2.00964	Beta-glucuronosyltransferase GlcAT14A OS=Arabidopsis thaliana GN=GLCAT14A PE=2 SV=1	PREDICTED: beta-glucuronosyltransferase GlcAT14A [Malus domestica]
MD06G1165300	2.65871	2.30078	2.61546	0.624263	1.74576	0.927017	1.07913	0.707799	1.37895	Probable serine/threonine-protein kinase WNK2 OS=Oryza sativa subsp. japonica GN=WNK2 PE=2 SV=1	PREDICTED: probable serine/threonine-protein kinase WNK3 isoform X1 [Malus domestica]
MD10G1142000	0.906587	1.75035	1.63113	3.89321	2.17748	4.2947	4.83646	2.92597	2.52261	Homoserine kinase OS=Arabidopsis thaliana GN=HSK PE=1 SV=1	PREDICTED: homoserine kinase [Malus domestica]
MD16G1019500	1.44974	1.6078	0.707986	0.0415046	0.43241	0.334581	0.277259	0.357645	0.278709	Nudix hydrolase 17, mitochondrial OS=Arabidopsis thaliana GN=NUDT17 PE=2 SV=1	PREDICTED: nudix hydrolase 17, mitochondrial [Malus domestica]
MD15G1203000	9.18039	6.02445	7.06979	3.18423	3.79137	1.57158	1.51938	2.42654	2.20614	#N/A	#N/A
MD03G1034200	2.13674	1.90042	1.77614	0.624742	1.09836	0.854362	0.652093	1.00939	0.655505	#N/A	#N/A
novel.344	6.67611	2.08831	2.49957	0.668956	1.49345	0.660327	0.531995	0.470563	0.962601	#N/A	#N/A
MD00G1098300	2.47494	1.6891	3.14249	7.7055	4.26308	4.52869	10.709	7.71921	9.99185	--	PREDICTED: uncharacterized WD repeat-containing protein C2A9.03-like [Malus domestica]
MD05G1262700	3.36225	6.56026	3.25142	2.65901	1.40002	1.28413	1.05048	2.32294	1.82396	Beta-amyrin 28-oxidase OS=Panax ginseng PE=2 SV=1	PREDICTED: beta-amyrin 28-oxidase-like [Malus domestica]
MD14G1002600	26.0202	8.23469	29.3493	10.3089	6.45916	7.13976	3.85262	3.81596	8.63307	--	PREDICTED: uncharacterized protein LOC103453877 [Malus domestica]
MD02G1139700	0.193122	1.07089	0.424404	2.19774	3.62894	1.14609	2.49305	1.42928	2.32046	Dehydrin Xero 2 OS=Arabidopsis thaliana GN=XERO2 PE=2 SV=1	dehydrin DHN3-like [Malus domestica]
MD09G1072200	207.514	112.079	307.245	697.147	272.452	592.008	669.22	566.404	397.703	Cellulose synthase-like protein H1 OS=Oryza sativa subsp. japonica GN=CSLH1 PE=2 SV=2	PREDICTED: cellulose synthase-like protein H1 [Pyrus x bretschneideri]
MD03G1207400	1.27011	0.243795	0.496212	2.26354	1.76158	2.38689	3.97759	3.65928	7.69157	Cytochrome P450 71A25 OS=Arabidopsis thaliana GN=CYP71A25 PE=2 SV=1	PREDICTED: cytochrome P450 71A25-like [Malus domestica]
MD12G1236900	0.933625	0.348458	0.759899	1.88772	1.23571	1.76992	4.94741	2.22096	3.01015	Serine/threonine-protein kinase WNK1 OS=Arabidopsis thaliana GN=WNK1 PE=1 SV=1	PREDICTED: probable serine/threonine-protein kinase WNK9 isoform X1 [Malus domestica]
MD01G1137300	0.410011	0.267479	0.5418	0.932152	1.12222	0.858785	2.44466	1.52997	2.04014	L-type lectin-domain containing receptor kinase S.4 OS=Arabidopsis thaliana GN=LECRKS4 PE=2 SV=1	PREDICTED: L-type lectin-domain containing receptor kinase S.4-like [Malus domestica]
MD10G1307800	3.4806	1.91394	3.97294	1.90888	1.21951	1.14063	0.521296	1.77346	0.927118	G-type lectin S-receptor-like serine/threonine-protein kinase RKS1 OS=Arabidopsis thaliana GN=RKS1 PE=3 SV=3	PREDICTED: G-type lectin S-receptor-like serine/threonine-protein kinase RKS1 isoform X1 [Malus domestica]
MD15G1364800	11.3743	8.29402	15.3918	40.9319	12.5659	33.0594	47.6078	40.1418	16.0948	Patellin-6 OS=Arabidopsis thaliana GN=PATL6 PE=2 SV=1	PREDICTED: random slug protein 5-like [Malus domestica]
MD10G1316300	0.255042	4.20648	0.249102	0.0365081	0.266248	0.12613	0.0812936	0	0	Beta-glucosidase 47 OS=Arabidopsis thaliana GN=BGLU47 PE=3 SV=2	PREDICTED: beta-glucosidase 47-like isoform X1 [Malus domestica]
MD15G1039300	2.7457	8.66891	5.23818	24.8382	6.01587	20.7107	16.7102	20.0493	8.46048	CBL-interacting serine/threonine-protein kinase 5 OS=Arabidopsis thaliana GN=CIPK5 PE=2 SV=1	CBL-interacting serine/threonine-protein kinase 5 [Malus domestica]
MD04G1195900	2.54879	3.95735	2.88773	1.83883	0.592972	1.10923	0.731173	1.72464	1.274	Chaperone protein dnaJ 6 OS=Arabidopsis thaliana GN=ATJ6 PE=2 SV=1	PREDICTED: dnaJ homolog subfamily B member 3-like [Pyrus x bretschneideri]
MD09G1213100	0	0	0.0856459	0.301252	1.33389	0.52039	0.922359	0.927103	0.674316	--	PREDICTED: uncharacterized protein LOC103408844 [Malus domestica]
MD02G1183500	0.310303	0.75236	0.350929	0.757449	1.30062	1.95458	0.796467	1.86484	1.1931	BTB/POZ domain-containing protein NPY2 OS=Arabidopsis thaliana GN=NPY2 PE=2 SV=1	PREDICTED: BTB/POZ domain-containing protein NPY2-like [Malus domestica]
MD16G1056200	1.06536	2.51019	1.8829	8.2133	2.40593	4.54112	10.2117	6.46326	2.85276	ACT domain-containing protein ACR4 OS=Arabidopsis thaliana GN=ACR4 PE=2 SV=1	PREDICTED: ACT domain-containing protein ACR4-like [Malus domestica]
MD01G1209200	452.246	178.398	393.783	76.5577	205.817	39.9131	86.2014	102.852	204.96	Heavy metal-associated isoprenylated plant protein 39 OS=Arabidopsis thaliana GN=HIPP39 PE=2 SV=1	PREDICTED: heavy metal-associated isoprenylated plant protein 3-like isoform X1 [Malus domestica]
MD10G1019900	11.4619	5.65372	4.8812	1.86622	3.88859	3.11629	0.883057	2.46961	1.98422	L-type lectin-domain containing receptor kinase S.6 OS=Arabidopsis thaliana GN=LECRKS6 PE=2 SV=1	PREDICTED: LOW QUALITY PROTEIN: L-type lectin-domain containing receptor kinase S.6-like [Malus domestica]
MD11G1300300	0.659985	0.140758	0.805766	5.66842	1.47639	2.28474	6.46879	3.48891	5.86823	Monothiol glutaredoxin-S6 OS=Arabidopsis thaliana GN=GRXS6 PE=3 SV=1	PREDICTED: monothiol glutaredoxin-S6-like [Malus domestica]
MD05G1144000	2.37293	0.485843	1.76142	4.23912	4.07675	6.00842	25.9583	4.61624	7.02534	AT-hook motif nuclear-localized protein 29 OS=Arabidopsis thaliana GN=AHL29 PE=1 SV=1	PREDICTED: AT-hook motif nuclear-localized protein 25-like [Malus domestica]
MD08G1103600	0.865107	1.42138	0.876252	2.77943	1.60554	2.66208	3.12516	1.96481	1.97114	--	hypothetical protein PRUPE_1G438700 [Prunus persica]
MD12G1208000	0.0730535	0.0623219	0.11892	0.209145	0.392211	0.602137	0.419139	0.437678	0.25748	Werner Syndrome-like exonuclease OS=Arabidopsis thaliana GN=WEX PE=1 SV=1	PREDICTED: uncharacterized protein LOC103413943 isoform X1 [Malus domestica]
MD02G1034500	0.942043	0.506007	0.954179	1.97778	1.68589	1.62196	5.33817	2.65598	4.76241	Probable ethanolamine kinase OS=Arabidopsis thaliana GN=EMB1187 PE=2 SV=1	PREDICTED: probable ethanolamine kinase [Malus domestica]
MD14G1150700	5.1203	6.87831	5.49887	2.34808	4.27069	1.83328	0.930502	1.76369	3.31834	Probable serine/threonine-protein kinase At1g54610 OS=Arabidopsis thaliana GN=At1g54610 PE=1 SV=1	PREDICTED: probable serine/threonine-protein kinase At1g54610 [Malus domestica]
MD15G1180000	39.408	22.3232	46.5225	14.6504	24.0658	10.3721	10.0276	16.6618	20.3492	Probable WRKY transcription factor 16 OS=Arabidopsis thaliana GN=WRKY16 PE=3 SV=1	PREDICTED: TMV resistance protein N-like [Pyrus x bretschneideri]
MD11G1216500	10.5928	8.5705	11.5777	2.9243	7.48496	3.28451	3.13522	4.88863	3.23244	--	PREDICTED: uncharacterized protein LOC103430090 [Malus domestica]
MD16G1116100	3.01986	1.04749	15.9145	144.505	15.5895	85.3404	82.7915	156.132	13.3657	Geraniol 8-hydroxylase OS=Catharanthus roseus GN=CYP76B6 PE=1 SV=1	PREDICTED: geraniol 8-hydroxylase-like [Pyrus x bretschneideri]
MD16G1099500	29.0645	16.9027	38.2517	77.2056	38.1483	67.6365	56.2487	66.3487	50.318	SufE-like protein 2, chloroplastic OS=Arabidopsis thaliana GN=SUFE2 PE=2 SV=1	PREDICTED: sufE-like protein 2, chloroplastic [Malus domestica]
MD13G1045900	3.60531	1.97723	6.03658	22.8182	5.0695	9.67908	54.7091	28.7699	16.3789	Allene oxide cyclase 4, chloroplastic OS=Arabidopsis thaliana GN=AOC4 PE=2 SV=1	PREDICTED: allene oxide cyclase 4, chloroplastic [Malus domestica]
MD16G1047500	240.167	148.266	492.276	1006.18	458.453	774.36	1191.97	1099.15	760.738	Allene oxide cyclase, chloroplastic OS=Oryza sativa subsp. japonica GN=AOC PE=1 SV=1	PREDICTED: allene oxide cyclase 4, chloroplastic [Malus domestica]
novel.660	7.97756	18.626	17.8097	8.96386	4.99148	5.51743	3.90025	2.79034	3.92066	#N/A	#N/A
MD03G1039000	1.31315	1.36919	0.142507	0	0	0	0	0	0	Heavy metal-associated isoprenylated plant protein 41 OS=Arabidopsis thaliana GN=HIPP41 PE=3 SV=1	PREDICTED: uncharacterized protein LOC108170161 [Malus domestica]
MD04G1167700	481.363	154.254	452.703	98.0871	215.632	67.4384	23.4444	160.818	101.948	WRKY transcription factor WRKY24 OS=Oryza sativa subsp. japonica GN=WRKY24 PE=2 SV=1	probable WRKY transcription factor 33 [Malus domestica]
MD13G1081800	0.194007	0.30737	0.406045	2.71363	0.644792	0.548256	4.6114	1.78745	1.25213	LEAF RUST 10 DISEASE-RESISTANCE LOCUS RECEPTOR-LIKE PROTEIN KINASE-like 1.5 OS=Arabidopsis thaliana GN=LRK10L-1.5 PE=3 SV=1	PREDICTED: LEAF RUST 10 DISEASE-RESISTANCE LOCUS RECEPTOR-LIKE PROTEIN KINASE-like 1.5 [Malus domestica]
MD04G1162200	0.484425	0.137754	0.283885	1.13723	0.780237	0.894393	1.08086	1.80966	1.33486	Ammonium transporter 3 member 1 OS=Oryza sativa subsp. japonica GN=AMT3-1 PE=2 SV=1	PREDICTED: ammonium transporter 2-like, partial [Malus domestica]
MD00G1115200	1.73554	1.99113	1.69511	0.668201	0.910358	0.651124	0.228908	0.442914	0.115053	Dof zinc finger protein DOF3.7 OS=Arabidopsis thaliana GN=DOF3.7 PE=1 SV=2	PREDICTED: dof zinc finger protein DOF2.1-like [Malus domestica]
MD07G1043500	2.73951	1.16854	3.37249	7.54883	4.46855	5.10875	13.8894	8.14612	4.77289	Probable choline kinase 2 OS=Arabidopsis thaliana GN=At1g74320 PE=2 SV=1	PREDICTED: probable choline kinase 2 isoform X1 [Pyrus x bretschneideri]
MD05G1207400	0.585124	0.223765	0.433548	0.138633	0.0902708	0.0997827	0.0771747	0.106661	0.0387892	Disease resistance protein RPM1 OS=Arabidopsis thaliana GN=RPM1 PE=1 SV=1	PREDICTED: disease resistance protein RPM1-like [Malus domestica]
MD10G1020000	14.7993	10.7384	11.5087	6.28626	8.38449	3.46057	5.15304	5.78253	6.64895	TMV resistance protein N OS=Nicotiana glutinosa GN=N PE=1 SV=1	PREDICTED: TMV resistance protein N-like [Malus domestica]
MD11G1260800	3.87824	2.55594	2.79622	8.0485	3.09792	12.8413	15.5344	17.6157	2.97593	TPR repeat-containing thioredoxin TTL1 OS=Arabidopsis thaliana GN=TTL1 PE=1 SV=1	PREDICTED: TPR repeat-containing thioredoxin TTL1-like [Malus domestica]
MD02G1299900	3.45339	2.70559	5.16269	11.1377	4.95048	8.6787	13.3775	10.4319	6.67295	Serine/threonine-protein kinase-like protein At3g51990 OS=Arabidopsis thaliana GN=At3g51990 PE=2 SV=1	PREDICTED: serine/threonine-protein kinase-like protein At3g51990 [Malus domestica]
MD02G1021400	13.1477	13.3641	21.0381	38.6016	45.3897	18.6302	47.0793	43.378	63.549	Bifunctional purple acid phosphatase 26 OS=Arabidopsis thaliana GN=PAP26 PE=1 SV=1	PREDICTED: bifunctional purple acid phosphatase 26-like [Malus domestica]
MD17G1240400	41.9317	28.9141	81.0376	142.832	81.1543	116.949	134.486	154.566	128.484	--	PREDICTED: ATP-dependent helicase brm-like isoform X2 [Malus domestica]
MD13G1030600	113.053	56.0994	108.332	63.7203	33.2064	31.7722	46.5011	53.4232	37.1843	Protein PLANT CADMIUM RESISTANCE 2 OS=Arabidopsis thaliana GN=PCR2 PE=1 SV=1	PREDICTED: protein PLANT CADMIUM RESISTANCE 2-like [Malus domestica]
MD01G1158000	19.1301	20.8812	27.0529	59.8302	24.5686	51.5189	58.6294	52.6145	34.7129	Cytosolic endo-beta-N-acetylglucosaminidase 1 OS=Arabidopsis thaliana GN=ENGASE1 PE=1 SV=1	PREDICTED: cytosolic endo-beta-N-acetylglucosaminidase 1-like [Pyrus x bretschneideri]
MD16G1044000	117.721	212.671	207.792	493.363	238.849	344.95	531.989	340.301	421.796	Protein NRT1/ PTR FAMILY 3.1 OS=Arabidopsis thaliana GN=NPF3.1 PE=2 SV=1	PREDICTED: protein NRT1/ PTR FAMILY 3.1 [Malus domestica]
MD11G1060600	16.3599	11.433	22.9381	78.4294	11.6466	75.7675	64.0023	65.7061	37.5836	Protein NUCLEAR FUSION DEFECTIVE 4 OS=Arabidopsis thaliana GN=NFD4 PE=3 SV=1	PREDICTED: protein NUCLEAR FUSION DEFECTIVE 4 [Malus domestica]
MD07G1249600	8.27976	7.65589	8.42604	22.0907	8.03014	23.7758	25.9487	14.2887	10.4492	Putative kinase-like protein TMKL1 OS=Arabidopsis thaliana GN=TMKL1 PE=1 SV=1	PREDICTED: putative kinase-like protein TMKL1 [Malus domestica]
MD03G1072600	7.98128	4.00359	4.31864	0.959684	3.24232	2.19459	0.763199	1.6708	2.33226	Probable LRR receptor-like serine/threonine-protein kinase At3g47570 OS=Arabidopsis thaliana GN=At3g47570 PE=2 SV=1	PREDICTED: putative receptor-like protein kinase At3g47110 [Malus domestica]

## Sheet: Table S2
Table S2 The KEGG enrichment analysis of differentially expressed genes between ‘Galaxy Gala’ and its transgenic lines with MdMYB10 overexpression.
KEGG Main Class	KEGG Subclass
1. Metabolism	1.1 Carbohydrate metabolism	MD03G1170700/MD16G1138900/MD00G1005700/MD09G1285100/MD17G1179500/MD09G1030800/MD03G1069400/MD05G1013400/MD16G1022200/MD01G1194700/MD11G1195800/MD11G1307000/MD04G1069500/MD15G1243000/MD16G1016800/MD11G1024000/MD16G1089800/MD10G1316300/MD00G1105700/MD17G1140800/MD15G1037300/MD15G1345700/MD04G1047700/MD15G1365900/MD12G1150100/MD00G1130900/MD16G1007900/MD09G1034400/MD02G1244000/MD07G1254500/MD16G1022…
	1.2 Energy metabolism	MD12G1003600/MD11G1202100/MD01G1219500/MD09G1034400/MD01G1174400/MD03G1170700/MD14G1002500/MD17G1030600/MD11G1246900/MD12G1206600/MD04G1055700
	1.3 Lipid metabolism	MD17G1118500/MD02G1261000/MD05G1013400/MD10G1190400/MD11G1093000/MD09G1221600/MD12G1218200/MD13G1045900/MD08G1038600/MD16G1047500/MD05G1285000/MD07G1043500/MD15G1365400/MD15G1345700/MD14G1107200/MD12G1087400/MD02G1317800/MD15G1237100/MD15G1023700/MD15G1028600/MD07G1004600/MD17G1010400/MD06G1200300/MD12G1150100/MD02G1034500/MD07G1003600/MD02G1287500
	1.4 Nucleotide metabolism	MD05G1314100/MD01G1114300/MD05G1163300/MD06G1144200
	1.5 Amino acid metabolism	MD12G1003600/MD12G1246700/MD06G1118700/MD03G1237500/MD01G1236300/MD14G1002500/MD15G1345700/MD11G1202100/MD16G1132300/MD02G1073400/MD01G1174400/MD10G1142000/MD17G1235000/MD05G1013400/MD13G1222900/MD01G1219500/MD07G1216200/MD03G1066000/MD01G1108900/MD14G1175000/MD11G1070800/MD04G1055700/MD03G1237300
	1.6 Metabolism of other amino acids	MD15G1345700/MD06G1118700/MD03G1069400/MD15G1243000/MD17G1133600/MD10G1316300/MD05G1184400/MD00G1157300/MD11G1024000/MD06G1012200/MD04G1111400/MD00G1105700/MD17G1272100/MD09G1147100/MD03G1069500
	1.7 Glycan biosynthesis and metabolism	MD12G1075400/MD01G1158000/MD02G1287500
	1.8 Metabolism of cofactors and vitamins	MD01G1236300/MD01G1114300/MD12G1017400/MD00G1176400/MD17G1235000/MD06G1144200/MD12G1197300/MD15G1061700
	1.9 Metabolism of terpenoids and polyketides	MD04G1206900/MD17G1091300/MD12G1086800/MD10G1314500/MD17G1090100/MD10G1158100/MD09G1248000/MD05G1341000/MD05G1169600
	1.10 Biosynthesis of other secondary metabolites	MD01G1236300/MD03G1069400/MD04G1170900/MD10G1097200/MD11G1024000/MD02G1073400/MD10G1316300/MD00G1105700/MD06G1201700/MD04G1003400/MD15G1024100/MD15G1407300/MD01G1167300/MD07G1233400/MD17G1235000/MD16G1048500/MD03G1069500
2. Genetic Information Processing	2.1 Transcription	MD04G1125600/MD07G1196500/MD02G1013600/MD15G1068900/MD12G1026300/MD17G1225700
	2.2 Translation	MD12G1197300/MD02G1037500/MD03G1274200/MD11G1296600/MD14G1016100/MD11G1171700/MD01G1009700/MD08G1095700/MD10G1161600/MD07G1033800
	2.3 Folding, sorting and degradation	MD12G1034100/MD12G1107600/MD08G1095700/MD11G1134600/MD00G1046700/MD07G1210700/MD11G1174700/MD14G1041000/MD04G1207800/MD16G1157700/MD08G1249100/MD13G1108500/MD12G1026300/MD17G1225700/MD16G1108600/MD07G1195500/MD04G1125600/MD15G1269800/MD03G1036600/MD07G1196500/MD09G1248700/MD11G1037400/MD07G1253800
	2.4 Replication and repair	MD05G1243000
3. Environmental Information Processing	3.1 Membrane transport	MD13G1109600/MD10G1255500
	3.2 Signal transduction	MD06G1200300/MD04G1167700/MD05G1164900/MD05G1223400/MD02G1084600/MD06G1115400/MD15G1171800/MD13G1044600/MD15G1060800/MD04G1225000/MD08G1091700/MD05G1108800/MD03G1273300/MD15G1225800/MD13G1030000/MD08G1015500/MD12G1245100/MD08G1150200/MD15G1125200/MD05G1109100
4. Cellular Processes	4.1 Transport and catabolism	MD04G1125600/MD07G1196500/MD15G1186500/MD03G1094900/MD15G1237100/MD06G1230900/MD12G1026300/MD17G1225700/MD04G1207800/MD03G1004400/MD04G1206900/MD03G1128900/MD17G1118500/MD11G1148200
5. Organismal Systems	5.1 Environmental adaptation	MD05G1108800/MD15G1282600/MD10G1321000/MD03G1036600/MD07G1063300/MD12G1194200/MD11G1037400/MD05G1109100/MD04G1183900/MD04G1003400/MD08G1147100/MD07G1265800/MD15G1106000/MD12G1130800/MD05G1080100/MD04G1167700/MD14G1043300

## Sheet: Table S3
Table S3 Expression (FPKM) of genes involved in carbon metabolism (1.1 carbohydrate metabolism in Table S2) and nitrogen metabolism (1.5 amino acid metabolism in Table S2) in 'Galaxy Gala' (WT) and its transgenic lines (L8, L9) with MdMBY10 overexpression.
1.1 Carbohydrate metabolism	KEGG_pathway_annotation	Swiss-Prot_annotation	NR_annotation	WT	L8	L9
MD02G1244000	Glycolysis / Gluconeogenesis (ko00010);; Purine metabolism (ko00230);; Pyruvate metabolism (ko00620);; Carbon metabolism (ko01200);; Biosynthesis of amino acids (ko01230)	Pyruvate kinase 1, cytosolic OS=Oryza sativa subsp. japonica GN=Os11g0148500 PE=1 SV=1	PREDICTED: pyruvate kinase 1, cytosolic-like [Malus domestica]	5.33921	19.8496	34.6608
MD03G1170700	Glycolysis / Gluconeogenesis (ko00010);; Fructose and mannose metabolism (ko00051);; Galactose metabolism (ko00052);; Starch and sucrose metabolism (ko00500);; Amino sugar and nucleotide sugar metabolism (ko00520);; Carbon metabolism (ko01200)	Hexokinase-4 OS=Arabidopsis thaliana GN=At3g20040 PE=1 SV=2	PREDICTED: hexokinase-3 [Malus domestica]	4.43108	37.2922	85.4192
MD05G1013400	Glycolysis / Gluconeogenesis (ko00010);; Fatty acid degradation (ko00071);; Tyrosine metabolism (ko00350);; alpha-Linolenic acid metabolism (ko00592)	Alcohol dehydrogenase 1 OS=Pisum sativum PE=1 SV=1	PREDICTED: alcohol dehydrogenase 1-like [Malus domestica]	2.7346	8.7049	14.7635
MD12G1150100	Glycolysis / Gluconeogenesis(ko00010);Pentose and glucuronate interconversions(ko00040);Glycerolipid metabolism(ko00561);Biosynthesis of secondary metabolites(ko1110)	NADPH-dependent aldo-keto reductase, chloroplastic OS=Arabidopsis thaliana GN=AKR4C9 PE=1 SV=1	hypothetical protein VITISV_025518 [Vitis vinifera]	0.611572	2.85079	2.70548
MD15G1345700	Glycolysis / Gluconeogenesis (ko00010);; Pentose and glucuronate interconversions (ko00040);; Ascorbate and aldarate metabolism (ko00053);; Fatty acid degradation (ko00071);; Valine, leucine and isoleucine degradation (ko00280);; Lysine degradation (ko00310);; Arginine and proline metabolism (ko00330);; Histidine metabolism (ko00340);; Tryptophan metabolism (ko00380);; beta-Alanine metabolism (ko…	Aldehyde dehydrogenase family 3 member H1 OS=Arabidopsis thaliana GN=ALDH3H1 PE=1 SV=2	PREDICTED: aldehyde dehydrogenase family 3 member H1-like [Malus domestica]	10.1407	4.81014	4.74915
MD16G1138900	Citrate cycle (TCA cycle) (ko00020)	ATP-citrate synthase alpha chain protein 3 OS=Oryza sativa subsp. japonica GN=ACLA-3 PE=2 SV=1	PREDICTED: ATP-citrate synthase alpha chain protein 3, partial [Malus domestica]	17.9685	44.9379	48.5703
MD00G1005700	Pentose and glucuronate interconversions (ko00040);; Fructose and mannose metabolism (ko00051)	Sorbitol dehydrogenase OS=Arabidopsis thaliana GN=SDH PE=1 SV=1	PREDICTED: sorbitol dehydrogenase-like [Pyrus x bretschneideri]	51.3111	350.009	418.069
MD01G1194700	Pentose and glucuronate interconversions (ko00040);; Fructose and mannose metabolism (ko00051)	Sorbitol dehydrogenase OS=Arabidopsis thaliana GN=SDH PE=1 SV=1	PREDICTED: sorbitol dehydrogenase-like [Malus domestica]	40.5343	168.719	147.278
MD16G1022000	Pentose and glucuronate interconversions (ko00040);; Starch and sucrose metabolism (ko00500)	Probable pectinesterase/pectinesterase inhibitor 6 OS=Arabidopsis thaliana GN=PME6 PE=2 SV=1	PREDICTED: pectinesterase-like [Pyrus x bretschneideri]	42.3534	13.954	21.0133
MD16G1022100	Pentose and glucuronate interconversions (ko00040);; Starch and sucrose metabolism (ko00500)	Probable pectinesterase/pectinesterase inhibitor 6 OS=Arabidopsis thaliana GN=PME6 PE=2 SV=1	PREDICTED: pectinesterase-like [Pyrus x bretschneideri]	5.36142	0.857959	0.959791
MD16G1022200	Pentose and glucuronate interconversions (ko00040);; Starch and sucrose metabolism (ko00500)	Probable pectinesterase/pectinesterase inhibitor 6 OS=Arabidopsis thaliana GN=PME6 PE=2 SV=1	PREDICTED: pectinesterase-like [Pyrus x bretschneideri]	71.4499	13.5023	17.9585
MD02G1287500	Galactose metabolism (ko00052);; Other glycan degradation (ko00511);; Sphingolipid metabolism (ko00600)	--	PREDICTED: LOW QUALITY PROTEIN: beta-galactosidase [Malus domestica]	14.2168	32.4347	31.786
MD07G1254500	Galactose metabolism (ko00052);; Starch and sucrose metabolism (ko00500)	Acid beta-fructofuranosidase 1, vacuolar OS=Rosa hybrid cultivar PE=1 SV=1	PREDICTED: beta-fructofuranosidase, soluble isoenzyme I-like [Malus domestica]	8.31039	28.9054	63.5044
MD09G1285100	Galactose metabolism (ko00052)	Stachyose synthase OS=Pisum sativum GN=STS1 PE=1 SV=1	PREDICTED: stachyose synthase [Malus domestica]	0.256346	0.908849	1.66224
MD11G1195800	Galactose metabolism (ko00052);; Starch and sucrose metabolism (ko00500)	Acid beta-fructofuranosidase 1, vacuolar OS=Rosa hybrid cultivar PE=1 SV=1	vacuolar invertase [Malus domestica]	0.253311	1.96127	7.79691
MD09G1030800	Ascorbate and aldarate metabolism (ko00053)	Monodehydroascorbate reductase 4, peroxisomal OS=Arabidopsis thaliana GN=MDAR4 PE=1 SV=1	PREDICTED: monodehydroascorbate reductase 4, peroxisomal-like isoform X1 [Malus domestica]	7.41915	47.0231	57.1269
MD15G1243000	Ascorbate and aldarate metabolism (ko00053);; Glutathione metabolism (ko00480)	L-ascorbate peroxidase 3, peroxisomal OS=Arabidopsis thaliana GN=APX3 PE=1 SV=1	PREDICTED: L-ascorbate peroxidase 3, peroxisomal-like [Malus domestica]	17.5816	7.36367	3.69551
MD16G1007900	Ascorbate and aldarate metabolism (ko00053);; Inositol phosphate metabolism (ko00562)	Inositol oxygenase 1 OS=Arabidopsis thaliana GN=MIOX1 PE=2 SV=1	PREDICTED: inositol oxygenase 1 [Malus domestica]	14.7253	47.1689	38.6019
MD17G1179500	Ascorbate and aldarate metabolism (ko00053);; Inositol phosphate metabolism (ko00562)	Inositol oxygenase 1 OS=Arabidopsis thaliana GN=MIOX1 PE=2 SV=1	PREDICTED: inositol oxygenase 1-like isoform X1 [Pyrus x bretschneideri]	0.267326	0.981349	2.14715
MD00G1105700	Cyanoamino acid metabolism (ko00460);; Starch and sucrose metabolism (ko00500);; Phenylpropanoid biosynthesis (ko00940)	Beta-glucosidase 12 OS=Oryza sativa subsp. indica GN=BGLU12 PE=3 SV=1	beta-glucosidase 12-like precursor [Malus domestica]	0.0822419	1.33504	8.39334
MD03G1069400	Cyanoamino acid metabolism (ko00460);; Starch and sucrose metabolism (ko00500);; Phenylpropanoid biosynthesis (ko00940)	Beta-glucosidase 13 OS=Oryza sativa subsp. japonica GN=BGLU13 PE=2 SV=2	PREDICTED: beta-glucosidase 13-like [Malus domestica]	2.58505	8.61619	15.5406
MD10G1316300	Cyanoamino acid metabolism (ko00460);; Starch and sucrose metabolism (ko00500);; Phenylpropanoid biosynthesis (ko00940)	Beta-glucosidase 47 OS=Arabidopsis thaliana GN=BGLU47 PE=3 SV=2	PREDICTED: beta-glucosidase 47-like isoform X1 [Malus domestica]	1.57021	0.142962	0.0270979
MD11G1024000	Cyanoamino acid metabolism (ko00460);; Starch and sucrose metabolism (ko00500);; Phenylpropanoid biosynthesis (ko00940)	Beta-glucosidase 12 OS=Oryza sativa subsp. indica GN=BGLU12 PE=3 SV=1	PREDICTED: beta-glucosidase 12-like [Pyrus x bretschneideri]	6.33143	2.9767	2.43659
MD00G1130900	Starch and sucrose metabolism (ko00500)	Starch synthase 2, chloroplastic/amyloplastic OS=Arabidopsis thaliana GN=SS2 PE=1 SV=1	PREDICTED: LOW QUALITY PROTEIN: granule-bound starch synthase 2, chloroplastic/amyloplastic [Malus domestica]	46.1123	210.631	252.101
MD03G1069500	Starch and sucrose metabolism (ko00500);;Cyanoamino acid metabolism (ko00460);; Phenylpropanoid biosynthesis (ko00940)	Isoflavonoid 7-O-beta-apiosyl-glucoside beta-glycosidase OS=Dalbergia nigrescens PE=1 SV=1	PREDICTED: beta-glucosidase 13-like [Malus domestica]	99.9946	264.373	368.369
MD11G1307000	Starch and sucrose metabolism (ko00500)	Sucrose synthase 3 OS=Arabidopsis thaliana GN=SUS3 PE=1 SV=1	sucrose synthase 3 [Malus domestica]	22.9837	56.4392	89.6103
MD15G1365900	Starch and sucrose metabolism (ko00500)	Probable trehalose-phosphate phosphatase I OS=Arabidopsis thaliana GN=TPPI PE=3 SV=1	PREDICTED: probable trehalose-phosphate phosphatase C [Malus domestica]	9.03562	0.714993	0.378614
MD16G1089800	Starch and sucrose metabolism (ko00500)	Probable alpha,alpha-trehalose-phosphate synthase [UDP-forming] 9 OS=Arabidopsis thaliana GN=TPS9 PE=2 SV=1	PREDICTED: probable alpha,alpha-trehalose-phosphate synthase [UDP-forming] 9 [Malus domestica]	7.11021	16.5664	21.354
MD16G1016800	Starch and sucrose metabolism (ko00500)	Alpha,alpha-trehalose-phosphate synthase [UDP-forming] 6 OS=Arabidopsis thaliana GN=TPS6 PE=1 SV=2	PREDICTED: alpha,alpha-trehalose-phosphate synthase [UDP-forming] 6 [Malus domestica]	24.9735	75.3483	77.6245
MD04G1047700	Amino sugar and nucleotide sugar metabolism (ko00520)	Endochitinase EP3 OS=Arabidopsis thaliana GN=EP3 PE=1 SV=1	PREDICTED: endochitinase EP3-like [Malus domestica]	39.07	2.91639	2.52751
MD04G1069500	Amino sugar and nucleotide sugar metabolism (ko00520)	Bifunctional dTDP-4-dehydrorhamnose 3,5-epimerase/dTDP-4-dehydrorhamnose reductase OS=Arabidopsis thaliana GN=NRS/ER PE=1 SV=1	PREDICTED: bifunctional dTDP-4-dehydrorhamnose 3,5-epimerase/dTDP-4-dehydrorhamnose reductase [Malus domestica]	105.775	46.6296	47.0703
MD15G1037300	Amino sugar and nucleotide sugar metabolism (ko00520)	--	PREDICTED: acidic mammalian chitinase-like [Malus domestica]	23.9418	73.2849	104.456
MD17G1140800	Amino sugar and nucleotide sugar metabolism (ko00520)	Trifunctional UDP-glucose 4,6-dehydratase/UDP-4-keto-6-deoxy-D-glucose 3,5-epimerase/UDP-4-keto-L-rhamnose-reductase RHM1 OS=Arabidopsis thaliana GN=RHM1 PE=1 SV=1	PREDICTED: trifunctional UDP-glucose 4,6-dehydratase/UDP-4-keto-6-deoxy-D-glucose 3,5-epimerase/UDP-4-keto-L-rhamnose-reductase RHM1-like [Malus domestica]	2.61971	0.790178	0.96528
MD09G1034400	Glyoxylate and dicarboxylate metabolism (ko00630);; Carbon metabolism (ko01200)	Formate dehydrogenase, mitochondrial OS=Solanum tuberosum GN=FDH1 PE=1 SV=2	PREDICTED: formate dehydrogenase 1, mitochondrial-like [Pyrus x bretschneideri]	12.1708	75.3618	70.1223
1.5 Amino acid metabolism	KEGG_pathway_annotation	Swiss-Prot_annotation	NR_annotation	WT	L8	L9
MD16G1132300	Arginine biosynthesis(ko00220);Arginine and proline metabolism(ko00330)	PREDICTED: Malus domestica calponin homology domain-containing protein DDB_G0272472 (LOC114821978), mRNA	PREDICTED: calponin homology domain-containing protein DDB_G0272472-like [Pyrus x bretschneideri]	10.1909	31.9996	26.8281
MD03G1066000	Alanine, aspartate and glutamate metabolism (ko00250)	Asparagine synthetase [glutamine-hydrolyzing] OS=Asparagus officinalis PE=2 SV=2	PREDICTED: asparagine synthetase [glutamine-hydrolyzing]-like [Pyrus x bretschneideri]	2.27339	9.94252	10.9657
MD11G1070800	Alanine, aspartate and glutamate metabolism (ko00250)	Asparagine synthetase [glutamine-hydrolyzing] 1 OS=Lotus japonicus GN=AS1 PE=2 SV=2	PREDICTED: asparagine synthetase [glutamine-hydrolyzing] 1 [Malus domestica]	2.37567	12.5612	14.3279
MD01G1174400	Alanine, aspartate and glutamate metabolism (ko00250);; Arginine and proline metabolism (ko00330);; Nitrogen metabolism (ko00910)	Glutamate dehydrogenase 2 OS=Arabidopsis thaliana GN=GDH2 PE=1 SV=1	PREDICTED: glutamate dehydrogenase 2 [Pyrus x bretschneideri]	1.72324	17.8965	18.328
MD01G1219500	Alanine, aspartate and glutamate metabolism (ko00250);; Nitrogen metabolism (ko00910);; Biosynthesis of amino acids (ko01230)	Glutamate synthase [NADH], amyloplastic OS=Medicago sativa PE=1 SV=1	PREDICTED: glutamate synthase [NADH], amyloplastic isoform X1 [Malus domestica]	14.5143	49.2798	49.8685
MD04G1055700	Alanine, aspartate and glutamate metabolism (ko00250);; Arginine and proline metabolism (ko00330);; Nitrogen metabolism (ko00910)	Glutamate dehydrogenase 2 OS=Arabidopsis thaliana GN=GDH2 PE=1 SV=1	PREDICTED: glutamate dehydrogenase 2-like [Prunus mume]	3.60217	1.48889	1.5653
MD12G1003600	Alanine, aspartate and glutamate metabolism (ko00250);; Arginine and proline metabolism (ko00330);; Nitrogen metabolism (ko00910)	Glutamate dehydrogenase 1 OS=Arabidopsis thaliana GN=GDH1 PE=2 SV=1	PREDICTED: glutamate dehydrogenase 1 [Malus domestica]	6.54483	1.32179	0.998179
MD14G1002500	Alanine, aspartate and glutamate metabolism (ko00250);; Arginine and proline metabolism (ko00330);; Nitrogen metabolism (ko00910)	Glutamate dehydrogenase 1 OS=Arabidopsis thaliana GN=GDH1 PE=2 SV=1	PREDICTED: glutamate dehydrogenase 1-like [Malus domestica]	44.9688	16.4779	15.5081
MD10G1142000	Glycine, serine and threonine metabolism (ko00260);; Biosynthesis of amino acids (ko01230)	Homoserine kinase OS=Arabidopsis thaliana GN=HSK PE=1 SV=1	PREDICTED: homoserine kinase [Malus domestica]	1.42936	3.45513	3.42835
MD12G1246700	Glycine, serine and threonine metabolism (ko00260);; Biosynthesis of amino acids (ko01230)	Probable low-specificity L-threonine aldolase 1 OS=Arabidopsis thaliana GN=THA1 PE=1 SV=1	PREDICTED: probable low-specificity L-threonine aldolase 1 [Malus domestica]	91.9129	27.8298	30.1078
MD06G1118700	Cysteine and methionine metabolism (ko00270);; Selenocompound metabolism (ko00450)	Methionine gamma-lyase OS=Arabidopsis thaliana GN=MGL PE=1 SV=1	PREDICTED: methionine gamma-lyase [Malus domestica]	46.344	118.865	214.475
MD11G1202100	Cysteine and methionine metabolism (ko00270);; Sulfur metabolism (ko00920);; Carbon metabolism (ko01200);; Biosynthesis of amino acids (ko01230)	Serine acetyltransferase 3, mitochondrial OS=Arabidopsis thaliana GN=SAT3 PE=1 SV=3	chloroplast-like serine acetyltransferase 1 [Pyrus pyrifolia]	57.784	152.979	160.906
MD17G1235000	Cysteine and methionine metabolism (ko00270);; Tyrosine metabolism (ko00350);; Phenylalanine metabolism (ko00360);; Phenylalanine, tyrosine and tryptophan biosynthesis (ko00400);; Isoquinoline alkaloid biosynthesis (ko00950);; Tropane, piperidine and pyridine alkaloid biosynthesis (ko00960);; Biosynthesis of amino acids (ko01230);Ubiquinone and other terpenoid-quinone biosynthesis (ko00130);;	Probable aminotransferase TAT2 OS=Arabidopsis thaliana GN=At5g53970 PE=2 SV=1	PREDICTED: probable aminotransferase TAT2 isoform X1 [Pyrus x bretschneideri]	3.49223	0.513754	0.371612
MD15G1345700	Valine, leucine and isoleucine degradation (ko00280);;Glycolysis / Gluconeogenesis (ko00010);; Pentose and glucuronate interconversions (ko00040);; Ascorbate and aldarate metabolism (ko00053);; Fatty acid degradation (ko00071);; Lysine degradation (ko00310);; Arginine and proline metabolism (ko00330);; Histidine metabolism (ko00340);; Tryptophan metabolism (ko00380);; beta-Alanine metabolism (ko0…	Aldehyde dehydrogenase family 3 member H1 OS=Arabidopsis thaliana GN=ALDH3H1 PE=1 SV=2	PREDICTED: aldehyde dehydrogenase family 3 member H1-like [Malus domestica]	10.1407	4.81014	4.74915
MD13G1222900	Valine, leucine and isoleucine biosynthesis (ko00290);; C5-Branched dibasic acid metabolism (ko00660);; 2-Oxocarboxylic acid metabolism (ko01210);; Biosynthesis of amino acids (ko01230)	3-isopropylmalate dehydratase large subunit, chloroplastic OS=Arabidopsis thaliana GN=IIL1 PE=1 SV=1	PREDICTED: 3-isopropylmalate dehydratase large subunit-like [Pyrus x bretschneideri]	1.19631	4.13231	5.54239
MD03G1237500	Tyrosine metabolism (ko00350)	Homogentisate 1,2-dioxygenase OS=Arabidopsis thaliana GN=HGO PE=2 SV=2	PREDICTED: homogentisate 1,2-dioxygenase [Pyrus x bretschneideri]	10.5876	47.2754	56.0888
MD03G1237300	Tyrosine metabolism (ko00350)	Homogentisate 1,2-dioxygenase OS=Arabidopsis thaliana GN=HGO PE=2 SV=2	PREDICTED: homogentisate 1,2-dioxygenase [Pyrus x bretschneideri]	7.20624	32.9906	36.8529
MD05G1013400	Tyrosine metabolism (ko00350);; Glycolysis / Gluconeogenesis (ko00010);; Fatty acid degradation (ko00071);;alpha-Linolenic acid metabolism (ko00592)	Alcohol dehydrogenase 1 OS=Pisum sativum PE=1 SV=1	PREDICTED: alcohol dehydrogenase 1-like [Malus domestica]	2.7346	8.7049	14.7635
MD01G1236300	Phenylalanine metabolism (ko00360);;Ubiquinone and other terpenoid-quinone biosynthesis (ko00130);; Phenylpropanoid biosynthesis (ko00940)	4-coumarate--CoA ligase 2 OS=Glycine max PE=2 SV=2	PREDICTED: 4-coumarate--CoA ligase 2-like [Malus domestica]	19.3453	205.979	388.886
MD02G1073400	Phenylalanine metabolism (ko00360);; Phenylpropanoid biosynthesis (ko00940);; Flavonoid biosynthesis (ko00941);; Stilbenoid, diarylheptanoid and gingerol biosynthesis (ko00945)	Probable caffeoyl-CoA O-methyltransferase At4g26220 OS=Arabidopsis thaliana GN=At4g26220 PE=2 SV=1	PREDICTED: probable caffeoyl-CoA O-methyltransferase At4g26220 [Malus domestica]	5.95347	2.22192	1.41924
MD14G1175000	Tryptophan metabolism (ko00380)	Tryptophan aminotransferase-related protein 2 OS=Arabidopsis thaliana GN=TAR2 PE=2 SV=1	PREDICTED: tryptophan aminotransferase-related protein 2-like [Malus domestica]	2.2835	0.676144	0.877571
MD07G1216200	Phenylalanine, tyrosine and tryptophan biosynthesis (ko00400);; Biosynthesis of amino acids (ko01230)	Anthranilate synthase alpha subunit 1, chloroplastic OS=Arabidopsis thaliana GN=ASA1 PE=1 SV=1	PREDICTED: anthranilate synthase alpha subunit 1, chloroplastic-like [Malus domestica]	25.6023	148.137	313.062
MD01G1108900	Phenylalanine, tyrosine and tryptophan biosynthesis (ko00400);; Biosynthesis of amino acids (ko01230)	Chorismate synthase, chloroplastic OS=Arabidopsis thaliana GN=EMB1144 PE=2 SV=2	PREDICTED: chorismate synthase, chloroplastic-like [Malus domestica]	13.1669	37.0618	85.7407

## Sheet: Table S4
Table S4 Non-structural carbohydrate, organic acid, and free amino acid content in the leaves of ‘Galaxy Gala’ (WT) and its transgenic lines (L8, L9) with MdMYB10 overexpression.
(μmol m-2)	WT	L8	L9
3-phosphoglycerate	324.2±19.2	147.0±7.1**	153.2±19.6**
Dihydroxyacetone phosphate	4.2±0.5	2.4±0.6	2.7±0.6
Fructose 1,6-bisphosphate	3.4±0.7	1.2±0.4*	1.3±0.4*
Fructose 6-phosphate	55.0±2.7	30.2±3.4**	28.1±2.3**
Glucose 6-phosphate	107.5±3.4	51.4±4.4**	60.7±7.7**
Glucose 1-phosphate	13.5±0.6	10.9±0.5*	9.5±0.6**
Adenosine diphosphate glucose	4.0±0.4	1.5±0.1**	1.1±0.2**
Sedoheptulose 7-phosphate	59.8±7.4	23.7±1.9**	22.8±5.9**
Ribose 5 phosphate	5.4±0.5	4.7±0.5	4.0±0.7
Xylulose 5-phosphate + Ribulose 5-phosphate	9.5±0.8	5.2±0.9*	4.8±0.6**
Ribulose-1,5-bisphosphate	97.4±11.7	30.6±5.6**	58.4±3.4*
Uridine diphosphate glucose	29.3±1.6	20.0±1.0**	20.8±1.1**
Sucrose 6-phosphate	1.1±0.09	0.8±0.09*	0.8±0.09*
Sucrose	2381.8±77.6	1685.3±52.4**	1492.9±161.8**
Sorbitol 6-phosphate	54.6±2.8	25.6±2.2**	30.3±2.5**
Sorbitol	28561.0±562.4	18273.5±967.2**	17932.7±2286.7**
2-phosphoglycerate	5.4±0.6	2.0±0.3**	2.5±0.4**
Aconitate	22.3±0.7	14.1±1.2**	12.1±0.8**
2-ketoglutarate	187.5±15.8	111.1±6.8**	113.7±8.2**
Malate	7661.8±577.9	5435.8±253.8**	4501.9±254.9**
Myo-Inositol	426.6±13.4	276.7±8.2**	302.3±29.0**
Glucose	4042.6±105.3	3019.1±61.4**	2818.2±237.7**
Ribose	104.8±6.5	77.8±2.4**	77.9±4.0**
Erythritol	47.7±1.5	39.6±1.2**	38.5±1.5**
Phosphoenolpyruvate	10.4±1.5	3.7±0.6**	5.3±1.2*
Glycerate	550.1±34.2	320.9±30.2**	344.8±46.6*
Xylitol	151.4±10.2	107.5±6.9**	107.3±11.7*
Isocitrate	81.9±6.3	59.5±3.2*	47.4±5.7**
Shikimate	76.1±7.2	53.1±4.2*	47.7±5.6*
Citrate	654.2±32.1	541.4±18.7*	487.6±46.3*
Succinate	245.2±12.1	209.1±7.4*	194.2±8.1*
Xylulose	10.4±3.1	7.6±2.3	5.9±0.9
Pyruvate	48.6±3.6	38.6±3.0	37.0±3.5
Maltose	148.7±14.2	120.8±4.4	111.5±7.3
Galactose	1235.9±98.5	1026.5±51.6	996.4±83.2
Maltitol	57.9±5.1	47.6±3.6	51.3±5.4
Fumarate	42.9±3.0	41.5±3.3	36.0±2.3
Rhamonose	72.7±6.1	79.4±2.9	57.5±1.8
Quinate	7385.0±244.9	6677.7±379.3	7405.2±1014.0
Maleic Acid	1138.1±188.0	1220.8±52.1	1016.5±121.0
Fructose	2208.3±259.0	2846.5±593.8	1778.4±126.6
Xylose	58.9±7.6	73.9±2.0	56.0±5.5
Histidine	72.3±5.5	40.6±6.0**	36.0±2.7**
Glycine	89.0±7.7	45.4±4.1**	49.6±8.0**
Proline	97.7±4.5	53.5±2.4**	56.1±3.5**
Isoleucine	56.2±4.2	35.2±2.3**	33.0±2.2**
γ-aminobutyrate	176.1±7.2	108.5±2.0**	116.7±8.8**
Leucine	27.4±1.8	20.9±1.1*	15.8±1.1**
Phenylalanine	21.9±1.2	16.5±1.2*	13.3±1.0**
Serine	342.6±41.9	192.6±27.9*	237.0±17.5*
Alanine	35.6±3.6	23.6±1.9*	24.2±1.7*
Methionine	7.4±0.7	5.1±1.0	4.0±1.2
Valine	63.2±13.4	45.6±2.5	41.7±4.8
Arginine	88.6±17.1	74.6±7.7	65.0±8.5
Tyrosine	41.8±2.5	42.4±4.9	30.1±4.6
Threonine	468.0±87.9	492.4±88.8	436.8±54.2
Glutamate	716.1±41.8	815.0±74.2	746.3±68.0
Ornithine	11.2±3.8	13.6±3.9	12.9±3.4
Aspartate	239.3±28.7	309.6±63.1	280.1±48.2
Glutamine	162.0±28.1	345.2±50.8*	345.7±46.6*
Asparagine	49.9±29.7	259.4±37.3**	198.5±26.0**
For statistical analysis, the symbol “*” or “**” indicates a significant difference at P < 0.05 or P < 0.01, respectively, t-test.

## Sheet: Table S5
Table S5 Activities of key enzymes involved in photosynthesis in the leaves of ‘Galaxy Gala’ (WT) and its transgenic lines (L8, L9) with MdMYB10 overexpression.
(μmol m-2 s-1)	WT	L8	L9
Rubisco(ribulose-1,5-bisphosphate carboxylase/oxygenase)	21.5±1.6	10.4±0.9**	10.5±0.9**
GAPDH(glyceraldehyde-3-phosphate dehydrogenase)	159.7±4.2	94.3±16.9*	92.5±12.7**
PRK(phosphoribulokinase)	157.1±10.7	69.5±6.6**	94.0±9.5**
SPS(sucrose phosphate synthase)	2.6±0.5	0.8±0.3*	1.0±0.3*
A6PR(aldose-6-phosphate reductase)	2.5±0.1	1.3±0.3**	1.5±0.1**
For statistical analysis, the symbol “*” or “**” indicates a significant difference at P < 0.05 or P < 0.01, respectively, t-test.
